# Supplementary material for: Catalyst-free reductions of nitriles to amino-boranes using sodium amidoborane and lithium borohydride
Source: Royal Society of Chemistry journal article supplement (doi:10.1039/d1qo01904j), 2022-01-01
Supplement: d1qo01904j1.pdf [file d1qo01904j1.pdf]

## Supporting Information (SI)

### Catalyst-Free Reductions of Nitriles to Amino-Boranes Using Sodium Amidoborane and Lithium Borohydride

Jiamin Peng, Yuwei Song, Yingying Wang, Zhenxing Liu,\* Xuenian Chen\*

<sup>a</sup> College of Chemistry, Zhengzhou University, Zhengzhou, Henan 450001, China

#### Contents Page

|                                                              |     |
|--------------------------------------------------------------|-----|
| 1. General methods and materials                             | S2  |
| 2. General procedure and spectral data of compounds          | S2  |
| 3. One-Pot synthesis of primary amines                       | S12 |
| 4. Synthesis of secondary amines through reductive amination | S13 |
| 5. Preliminary mechanism study                               | S14 |
| 6. References                                                | S19 |
| 7. NMR spectra                                               | S20 |

## 1. General methods and Materials:

All experiments were carried out under a dry Argon atmosphere using standard Schlenk techniques or in a glovebox. Dry THF were obtained by distillation from Na/benzophenone.  $^1\text{H}$ ,  $^1\text{H}\{^{11}\text{B}\}$ ,  $^{13}\text{C}$ ,  $^{19}\text{F}$ ,  $^{11}\text{B}$  and  $^{11}\text{B}\{^1\text{H}\}$  NMR spectra were recorded on a Bruker AV300 MHz spectrometer, Bruker AVANCENE0 400 MHz spectrometer and Bruker AVANCE 600 MHz spectrometer. The data contain properties such as chemical shift, multiplicity and coupling constants. All chemical shifts were reported in ppm units with references to the residual solvent resonance or an external standard. Coupling constants J which are reported in hertz. High-resolution mass spectra (HRMS) were obtained *via* an electrospray ionization (ESI) mode using a UPLC G2-XS Qtof mass spectrometer and the  $\text{BH}_3$  in the products was disassociated due to electrospray ionization<sup>1</sup>. Sodium amino-borane was synthesized by the literature procedures<sup>2</sup>. All the nitriles were purchased from Energy Chemicals, Aladdin, Heowns or Royaltech. Compounds Ammonia borane and Lithium borohydride were purchased from ZhengzhouYuanli technology.

## 2. General procedure and spectral data of new compounds

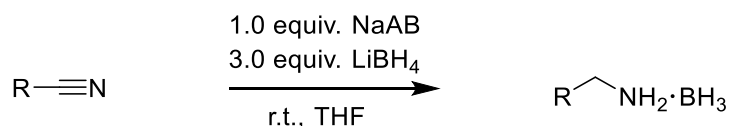

In an argon-filled glovebox, sodium amidoborane (0.2 mmol), lithium borohydride (0.6 mmol) were added in a 10-ml Schlenk flask and then the flask was removed out of the box. THF (4 ml) and nitriles (0.2 mmol) were added sequentially to the flask under  $\text{N}_2$ . Then the reaction mixture was allowed to stirred at room temperature. After completion of the reaction indicated by TLC, volatiles was then evaporated under reduced pressure and the residue was purified by flash chromatography on aluminum oxide. (petroleum ether: ethyl acetate = 4:1 for **2a** - **2q**, **2u**, **2v**, **2y** petroleum ether: ethyl acetate = 2:1 for **2r** - **2t**, **2x**, **2w**)

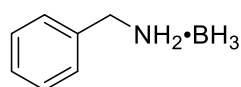

Following the general procedure, reaction time: 0.5 h.

**2a**<sup>3</sup>: white solid, 92%; 52-53°C;

**<sup>1</sup>H NMR** (400 MHz, DMSO)  $\delta$  7.48 - 7.22 (m, 5H), 5.67 (s, 2H), 3.72 - 3.55 (m, 2H);  
**<sup>1</sup>H{B} NMR** (400 MHz, DMSO)  $\delta$  7.55 - 7.16 (m, 5H), 5.65 (s, 2H), 3.61 (s, 2H), 1.42 (s, 3H);  
**<sup>11</sup>B NMR** (128 MHz, DMSO)  $\delta$  -20.10;  
**<sup>11</sup>B{H} NMR** (101 MHz, DMSO)  $\delta$  -20.00;  
**<sup>13</sup>C NMR** (101 MHz, DMSO)  $\delta$  137.81, 128.95, 128.6, 127.87, 52.19.

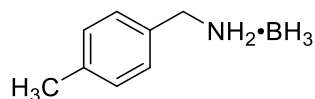

Following the general procedure, reaction time: 1 h.

**2b<sup>3</sup>**: white solid, 88%; melting point: 97-100°C;

**<sup>1</sup>H NMR** (400 MHz, CDCl<sub>3</sub>)  $\delta$  7.24 (d,  $J$  = 7.8 Hz, 2H), 7.11 (d,  $J$  = 7.8 Hz, 2H), 5.57 (s, 2H), 3.55 - 3.51 (m, 2H) 2.27 (s, 3H);  
**<sup>1</sup>H{B} NMR** (400 MHz, DMSO)  $\delta$  7.26 (d,  $J$  = 7.9 Hz, 2H), 7.13 (d,  $J$  = 7.8 Hz, 2H), 5.57 (s, 2H), 3.57 - 3.54 (m, 2H), 2.29 (s, 3H), 1.39 (t,  $J$  = 3.6 Hz, 3H);  
**<sup>11</sup>B NMR** (193 MHz, CDCl<sub>3</sub>)  $\delta$  -18.72(q,  $J$  = 90.7 Hz);  
**<sup>11</sup>B{<sup>1</sup>H} NMR** (193 MHz, CDCl<sub>3</sub>)  $\delta$  -18.90;  
**<sup>13</sup>C NMR** (151 MHz, CDCl<sub>3</sub>)  $\delta$  138.87, 133.01, 129.98, 128.18, 53.09, 21.17.

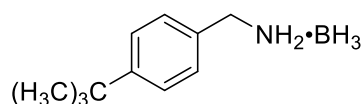

Following the general procedure, reaction time: 8 h.

**2c**: white solid, 82%; melting point: 120-122°C;

**<sup>1</sup>H NMR** (300 MHz, CD<sub>3</sub>CN)  $\delta$  7.42 (d,  $J$  = 8.3 Hz, 2H), 7.28 (d,  $J$  = 8.3 Hz, 2H), 4.34 (s, 2H), 3.75 - 3.70 (m, 2H), 1.30 (s, 9H);  
**<sup>1</sup>H{B} NMR** (600 MHz, CD<sub>3</sub>CN)  $\delta$  7.42 (d,  $J$  = 8.2 Hz, 2H), 7.28 (d,  $J$  = 8.2 Hz, 2H), 4.34 (s, 2H), 3.75 - 3.72 (m, 2H), 1.44 (t,  $J$  = 3.8 Hz, 3H), 1.31 (s, 9H);  
**<sup>11</sup>B NMR** (193 MHz, CD<sub>3</sub>CN)  $\delta$  -19.20 (q,  $J$  = 94.6Hz);  
**<sup>11</sup>B{H} NMR** (193 MHz, CD<sub>3</sub>CN)  $\delta$  -19.18;  
**<sup>13</sup>C NMR** (151 MHz, CD<sub>3</sub>CN)  $\delta$  151.67, 134.67, 129.00, 126.21, 52.59, 34.88, 31.21.  
**HRMS** (ESI<sup>+</sup>): exact mass calculated for [M+H]<sup>+</sup> (C<sub>11</sub>H<sub>18</sub>N) requires  $m/z$  = 164.1439, found  $m/z$  = 164.1437.

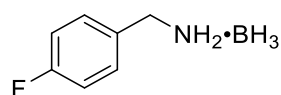

Following the general procedure, reaction time: 5 min.

**2d**: white solid, 72%; melting point: 108-110°C;

**<sup>1</sup>H NMR** (600 MHz, DMSO)  $\delta$  7.49 - 7.37 (m, 2H), 7.24 - 7.10 (m, 2H), 5.66 (s, 2H), 3.64 - 3.53 (m, 2H);  
**<sup>1</sup>H{B} NMR** (600 MHz, DMSO)  $\delta$  7.44 - 7.41 (m, 2H), 7.17 - 7.14 (m, 2H), 5.65 (s, 2H), 3.63 - 3.55 (m, 2H), 1.38 (d,  $J$  = 3.3 Hz, 3H);

$^{11}\text{B}$  NMR (128 MHz, DMSO)  $\delta$  -18.81;

$^{11}\text{B}\{\text{H}\}$  NMR (128 MHz, DMSO)  $\delta$  -18.75;

$^{13}\text{C}$  NMR (101 MHz, DMSO)  $\delta$  162.03(d,  $J$  = 243.4 Hz), 134.03 (d,  $J$  = 3 Hz), 131.15 (d,  $J$  = 8.1Hz), 115.35(d,  $J$  =21.2 Hz), 51.29;

$^{19}\text{F}\{\text{H}\}$  NMR (377 MHz, DMSO)  $\delta$  -115.21.

HRMS (ESI+): exact mass calculated for  $[\text{M}+\text{H}]^+$  ( $\text{C}_7\text{H}_9\text{FN}$ ) requires  $m/z$  = 126.0719, found  $m/z$  = 126.0722

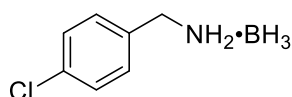

Following the general procedure, reaction time: 5 min.

**2e<sup>3</sup>**: white solid, 56%; melting point: 107-110°C;

$^1\text{H}$  NMR (300 MHz, DMSO)  $\delta$  7.50 - 7.31 (m, 4H), 5.69 (s, 2H), 3.65 - 3.52 (m, 2H);

$^1\text{H}\{^{11}\text{B}\}$  NMR (600 MHz, DMSO)  $\delta$  7.42 - 7.33 (m, 3H), 5.66 (s, 2H), 3.63 - 3.52 (m, 2H), 1.36 (s, 3H);

$^{11}\text{B}$  NMR (193 MHz, DMSO)  $\delta$  -18.73 (q,  $J$  = 90.7 Hz);

$^{11}\text{B}\{^1\text{H}\}$  NMR (193 MHz, DMSO)  $\delta$  -18.66;

$^{13}\text{C}$  NMR (151 MHz, DMSO)  $\delta$  136.82, 132.69, 130.94, 128.70, 51.45.

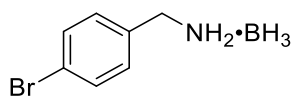

Following the general procedure, reaction time: 1 h.

**2f<sup>3</sup>**: white solid, 66%; melting point: 120-123°C;

$^1\text{H}$  NMR (300 MHz, DMSO)  $\delta$  7.52 (d,  $J$  = 8.4 Hz, 2H), 7.33 (d,  $J$  = 8.4 Hz, 2H), 5.68 (s, 2H), 3.61 - 3.53 (m, 2H);

$^1\text{H}\{\text{B}\}$  NMR (400 MHz, DMSO)  $\delta$  7.53 (d,  $J$  = 8.2 Hz, 2H), 7.35 (d,  $J$  = 8.2 Hz, 2H), 5.68 (s, 2H), 3.64 - 3.51 (m, 2H), 1.38 (s, 3H);

$^{11}\text{B}$  NMR (128 MHz, DMSO)  $\delta$  -18.81;

$^{11}\text{B}\{\text{H}\}$  NMR (128 MHz, DMSO)  $\delta$  -18.81;

$^{13}\text{C}$  NMR (151 MHz, DMSO)  $\delta$  137.14, 131.50, 131.29, 121.11, 51.33.

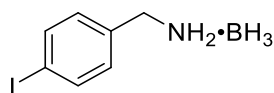

Following the general procedure, reaction time: 1 h.

**2g**: white solid 91%; melting point: 70-72°C;

$^1\text{H}$  NMR (400 MHz,  $\text{CDCl}_3$ )  $\delta$  7.67 (d,  $J$  = 7.9 Hz, 2H), 7.18 (d,  $J$  = 7.9 Hz, 2H), 5.65 (s, 2H), 3.59 - 3.49 (m, 2H);

$^1\text{H}\{\text{B}\}$  NMR (400 MHz, DMSO)  $\delta$  7.43 (d,  $J$  = 7.8 Hz, 2H), 7.38 (d,  $J$  = 7.9 Hz, 2H), 5.67 (s, 2H), 3.62 (d,  $J$  = 6.9 Hz, 2H), 1.37 (s, 3H);

$^{11}\text{B}$  NMR (128 MHz, DMSO)  $\delta$  -19.02;

$^{11}\text{B}\{\text{H}\}$  NMR (128 MHz, DMSO)  $\delta$  -19.15;

$^{13}\text{C}$  NMR (101 MHz, DMSO)  $\delta$  137.49, 137.38, 131.39, 93.97, 51.46.

HRMS (ESI+): exact mass calculated for  $[\text{M}+\text{H}]^+$  ( $\text{C}_7\text{H}_9\text{NI}$ ) requires  $m/z = 6233.9780$ , found  $m/z = 233.9779$ .

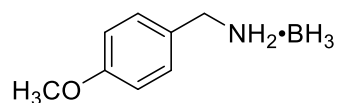

Following the general procedure, reaction time: 20 h.

**2h<sup>3</sup>**: white solid, 85%; melting point: 80-83°C;

$^1\text{H}$  NMR (300 MHz,  $\text{CDCl}_3$ )  $\delta$  7.23 (d,  $J = 8.2$  Hz, 2H), 6.88 (d,  $J = 8.2$  Hz, 2H), 4.03 (s, 2H), 3.89 - 3.81 (m, 2H), 3.79 (s, 3H);

$^1\text{H}\{\text{B}\}$  NMR (600 MHz,  $\text{CDCl}_3$ )  $\delta$  7.22 (d,  $J = 7.9$  Hz, 2H), 6.88 (d,  $J = 7.5$  Hz, 2H), 4.01 (s, 2H), 3.85 (d,  $J = 6.1$  Hz, 2H), 3.79 (s, 3H), 1.62 (s, 3H);

$^{11}\text{B}$  NMR (193 MHz,  $\text{CDCl}_3$ )  $\delta$  -18.91 (q,  $J = 83.0$  Hz);

$^{11}\text{B}\{\text{H}\}$  NMR (193 MHz,  $\text{CDCl}_3$ )  $\delta$  -18.90;

$^{13}\text{C}$  NMR (151 MHz,  $\text{CDCl}_3$ )  $\delta$  159.89, 129.78, 128.20, 114.57, 55.35, 52.62

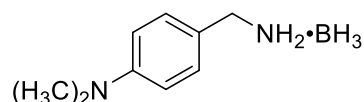

Following the general procedure, reaction time: 24 h.

**2i**: white solid, 46%; melting point: 99-101°C;

$^1\text{H}$  NMR (300 MHz,  $\text{CD}_3\text{CN}$ )  $\delta$  7.22 - 7.13 (m, 2H), 6.77 - 6.68 (m, 2H), 4.19 (s, 2H), 3.68 - 3.59 (m, 2H), 2.91 (s, 6H);

$^1\text{H}\{\text{B}\}$  NMR (600 MHz, DMSO)  $\delta$  7.17 (d,  $J = 8.5$  Hz, 2H), 6.72 (d,  $J = 8.4$  Hz, 2H), 4.19 (s, 2H), 3.66 - 3.61 (m, 2H), 2.91 (s, 6H), 1.41 (s, 3H);

$^{11}\text{B}$  NMR (193 MHz,  $\text{CDCl}_3$ )  $\delta$  -18.82 (q,  $J = 94.6$  Hz);

$^{11}\text{B}\{\text{H}\}$  NMR (193 MHz, DMSO)  $\delta$  -18.83;

$^{13}\text{C}$  NMR (151 MHz, DMSO)  $\delta$  151.29, 130.26, 125.04, 112.98, 52.67, 40.37.

HRMS (ESI+): exact mass calculated for  $[\text{M}+\text{H}]^+$  ( $\text{C}_9\text{H}_{15}\text{N}_2$ ) requires  $m/z = 151.1235$ , found  $m/z = 151.1236$ .

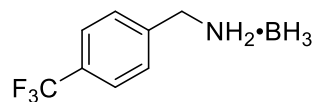

Following the general procedure, reaction time: 25 min.

**2j<sup>4</sup>**: white solid, 99%; melting point: 95-97 °C;

$^1\text{H}$  NMR (300 MHz,  $\text{CDCl}_3$ )  $\delta$  7.65 (d,  $J = 8.1$  Hz, 2H), 7.46 (d,  $J = 8.0$  Hz, 2H), 4.24 (s, 2H), 3.99 (dd,  $J = 8.9, 5.5$  Hz, 2H);

$^1\text{H}\{\text{B}\}$  NMR (600 MHz,  $\text{CDCl}_3$ )  $\delta$  7.65 (d,  $J = 7.7$  Hz, 2H), 7.46 (d,  $J = 7.6$  Hz, 2H), 4.24 (s, 2H), 4.06 - 3.90 (m, 2H), 1.64 (s, 3H);

$^{11}\text{B}$  NMR (193 MHz,  $\text{CDCl}_3$ )  $\delta$  -18.60 (m,  $J = 65.6$  Hz);

$^{11}\text{B}\{\text{H}\}$  NMR (193 MHz,  $\text{CDCl}_3$ )  $\delta$  -18.55;

$^{13}\text{C}$  NMR (151 MHz,  $\text{CDCl}_3$ )  $\delta$  139.40, 131.17(q,  $J = 33.22$ ), 128.84, 126.23(q,  $J = 135.9$ ), 123.75, 52.40.

$^{19}\text{F}\{\text{H}\}$  NMR (377 MHz, DMSO)  $\delta$  -60.97.

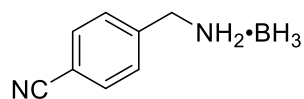

Following the general procedure, reaction time: 20 h.

**2k**: white solid, 60%, melting point: 150-153°C;

$^1\text{H}$  NMR (400 MHz, DMSO)  $\delta$  7.87 – 7.78 (m, 2H), 7.59 (d,  $J = 8.4$  Hz, 2H), 5.81 (s, 2H), 3.75 – 3.61 (m, 2H).

$^1\text{H}\{\text{B}\}$  NMR (400 MHz, DMSO)  $\delta$  7.82 (d,  $J = 8.2$  Hz, 2H), 7.59 (d,  $J = 8.2$  Hz, 2H), 5.80 (s, 2H), 3.75 – 3.65 (m, 2H), 1.39 (t,  $J = 3.7$  Hz, 3H).

$^{11}\text{B}$  NMR (128 MHz, DMSO)  $\delta$  -18.95;

$^{11}\text{B}\{\text{H}\}$  NMR (101 MHz, DMSO)  $\delta$  -18.98;

$^{13}\text{C}$  NMR (101 MHz, DMSO)  $\delta$  143.32, 132.56, 129.87, 119.25, 110.65, 51.49.

HRMS (ESI+): exact mass calculated for  $[\text{M}+\text{H}]^+$  ( $\text{C}_8\text{H}_9\text{N}_2$ ) requires  $m/z = 133.0766$ , found  $m/z = 133.0766$ .

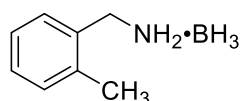

Following the general procedure, reaction time: 4 h.

**2l<sup>5</sup>**: white solid, 62%; melting point: 109-112°C;

$^1\text{H}$  NMR (300 MHz, DMSO)  $\delta$  7.33 - 7.28 (m, 1H), 7.17 - 7.12 (m, 3H), 5.53 (s, 2H), 3.62 - 3.54 (m, 2H), 2.27 (s, 3H);

$^1\text{H}\{\text{B}\}$  NMR (600 MHz, DMSO)  $\delta$  7.32 (d,  $J = 7.0$  Hz, 1H), 7.17 (t,  $J = 5.7$  Hz, 3H), 5.52 (s, 2H), 3.62 - 3.58 (m, 2H), 2.29 (s, 3H), 1.43 (t,  $J = 3.3$  Hz, 3H);

$^{11}\text{B}$  NMR (193 MHz, DMSO)  $\delta$  -18.73 (m,  $J = 86.9$  Hz);

$^{11}\text{B}\{\text{H}\}$  NMR (193 MHz, DMSO)  $\delta$  -18.66;

$^{13}\text{C}$  NMR (151 MHz, DMSO)  $\delta$  136.53, 135.93, 130.40, 129.36, 127.94, 126.19, 49.37, 19.24.

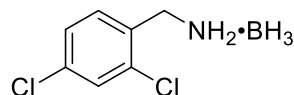

Following the general procedure, reaction time: 5 min.

**2m**: white solid, 89%; melting point: 98-100°C

$^1\text{H}$  NMR (300 MHz, DMSO)  $\delta$  7.63 - 7.39 (m, 3H), 5.73 (s, 2H), 3.75 - 3.65 (m, 2H);

$^1\text{H}\{\text{B}\}$  NMR (400 MHz,  $\text{CDCl}_3$ )  $\delta$  7.59 (s, 1H), 7.54 (d,  $J = 8.3$  Hz, 1H), 7.43 (d,  $J = 8.4$  Hz, 1H), 5.71 (d,  $J = 11.3$  Hz, 2H), 3.73 - 3.66 (m, 2H), 1.38 (s, 3H);

$^{11}\text{B}$  NMR (193 MHz, DMSO)  $\delta$  -18.88;

$^{11}\text{B}\{\text{H}\}$  NMR (193 MHz, DMSO)  $\delta$  -18.88;

$^{13}\text{C}$  NMR (101 MHz,  $\text{CDCl}_3$ )  $\delta$  138.93, 138.86, 138.16, 136.89, 133.75, 132.46, 53.13.

**HRMS** (ESI+): exact mass calculated for  $[M+H]^+$  ( $C_7H_8NCl_2$ ) requires  $m/z = 18.0034$ , found  $m/z = 178.0031$

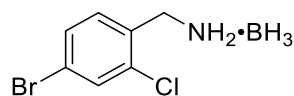

Following the general procedure, reaction time: 1 h.

**2n**: white solid, 54%; melting point: 103-106°C;

**<sup>1</sup>H NMR** (300 MHz, DMSO)  $\delta$  7.71 (d,  $J = 1.9$  Hz, 1H), 7.56 (dd,  $J = 8.3, 1.9$  Hz, 1H), 7.46 (d,  $J = 8.3$  Hz, 1H), 5.71 (s, 2H), 3.72 - 3.62 (m, 2H);

**<sup>1</sup>H{B} NMR** (400 MHz, DMSO)  $\delta$  7.68 (d,  $J = 28.9$  Hz, 1H), 7.55 (dd,  $J = 16.0, 6.9$  Hz, 1H), 7.49 (t,  $J = 7.2$  Hz, 1H), 5.71 (s, 2H), 3.73 - 3.66 (m, 2H), 1.40 (s, 3H).

**<sup>11</sup>B NMR** (128 MHz, DMSO)  $\delta$  -18.71.

**<sup>11</sup>B{H} NMR** (128 MHz, DMSO)  $\delta$  -18.71.

**<sup>13</sup>C NMR** (101 MHz, DMSO)  $\delta$  134.55, 134.29, 132.42, 131.70, 130.61, 121.55, 48.45.

**HRMS** (ESI+): exact mass calculated for  $[M+H]^+$  ( $C_7H_8NClBr$ ) requires  $m/z = 218.9529$ , found  $m/z = 218.9525$ .

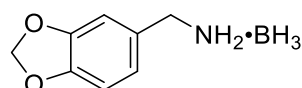

Following the general procedure, reaction time: 7 h.

**2o**: yellow oil, 66%;

**<sup>1</sup>H NMR** (400 MHz, DMSO)  $\delta$  6.97 (t,  $J = 3.4$  Hz, 1H), 6.92 - 6.77 (m, 2H), 5.98 (s, 2H), 5.55 (s, 2H), 3.52 - 3.48 (m, 2H);

**<sup>1</sup>H{B} NMR** (400 MHz, DMSO)  $\delta$  6.98 (d,  $J = 0.9$  Hz, 1H), 6.91 - 6.81 (m, 2H), 5.98 (s, 2H), 5.53 (s, 2H), 3.52 - 3.48 (m, 2H), 1.36 (t,  $J = 3.7$  Hz, 3H);

**<sup>11</sup>B NMR** (128 MHz, DMSO)  $\delta$  -19.36;

**<sup>11</sup>B{H} NMR** (128 MHz, DMSO)  $\delta$  -19.39;

**<sup>13</sup>C NMR** (101 MHz, DMSO)  $\delta$  147.52, 146.96, 131.62, 122.50, 109.49, 108.38, 101.33, 51.92.

**HRMS** (ESI+): exact mass calculated for  $[M+H]^+$  ( $C_8H_{10}NO_2$ ) requires  $m/z = 152.0712$ , found  $m/z = 152.0712$ .

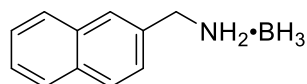

Following the general procedure, reaction time: 4 h.

**2p**: solid white, 56%; melting point: 108-110°C;

**<sup>1</sup>H NMR** (300 MHz, DMSO)  $\delta$  7.96 - 7.76 (m, 4H), 7.62 - 7.40 (m, 3H), 5.78 (s, 2H), 3.85 - 3.70 (m, 2H);

**<sup>1</sup>H{B} NMR** (600 MHz, DMSO)  $\delta$  7.96 - 7.76 (m, 4H), 7.62 - 7.40 (m, 3H), 5.78 (s, 2H), 3.85 - 3.70 (m, 2H), 1.45(s, 3H);

**<sup>11</sup>B NMR** (193 MHz, DMSO)  $\delta$  -18.60;

**<sup>11</sup>B{H} NMR** (193 MHz, DMSO)  $\delta$  -18.92.

<sup>13</sup>C NMR (151 MHz, DMSO) δ 135.36, 133.18, 132.76, 128.19, 128.12, 127.99, 127.56, 127.15, 126.70, 126.45, 52.26.

HRMS (ESI+): exact mass calculated for [M+H]<sup>+</sup> (C<sub>11</sub>H<sub>12</sub>N) requires *m/z* = 158.0970, found *m/z* = 158.0967.

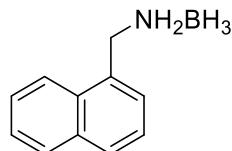

Following the general procedure, reaction time: 16 h.

**2q**: white solid, 96%; melting point: 170-172°C;

<sup>1</sup>H NMR (400 MHz, DMSO) δ 7.94 (dd, *J* = 50.1, 21.4 Hz, 3H), 7.69 - 7.44 (m, 4H), 5.79 (s, 2H), 4.09 (t, *J* = 19.5 Hz, 2H);

<sup>1</sup>H{B} NMR (400 MHz, DMSO) δ 8.16 - 7.86 (m, 3H), 7.54 (dd, *J* = 19.6, 12.7 Hz, 4H), 5.78 (s, 2H), 4.12 (d, *J* = 4.8 Hz, 2H), 1.57 (s, 3H);

<sup>11</sup>B NMR (128 MHz, DMSO) δ -18.64;

<sup>11</sup>B {H} NMR (128 MHz, DMSO) δ -18.74;

<sup>13</sup>C NMR (101 MHz, DMSO) δ 133.64, 133.46, 131.28, 129.00, 128.51, 126.91, 126.35, 125.79, 123.78, 49.04.

HRMS (ESI+): exact mass calculated for [M+H]<sup>+</sup> (C<sub>11</sub>H<sub>12</sub>N) requires *m/z* = 158.0970, found *m/z* = 158.0970.

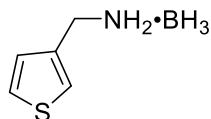

Following the general procedure, reaction time: 4 h.

**2r**: white solid, 88%; melting point: 135-137°C

<sup>1</sup>H NMR (400 MHz, DMSO) δ 7.51 - 7.46 (m, 1H), 7.44 (s, 1H), 7.18 (d, *J* = 4.9 Hz, 1H), 5.64 (s, 2H), 3.64 - 3.57 (m, 2H);

<sup>1</sup>H{B} NMR (400 MHz, DMSO) δ 7.48 (d, *J* = 4.3 Hz, 1H), 7.44 (s, 1H), 7.18 (d, *J* = 4.9 Hz, 1H), 5.63 (s, 2H), 3.65 - 3.57 (m, 2H), 1.39 (s, 3H);

<sup>11</sup>B NMR (128 MHz, DMSO) δ -18.77;

<sup>11</sup>B {H} NMR (128 MHz, DMSO) δ -18.73;

<sup>13</sup>C NMR (101 MHz, DMSO) δ 138.87, 128.60, 126.5, 123.71, 47.06.

HRMS (ESI+): exact mass calculated for [M+H]<sup>+</sup> (C<sub>5</sub>H<sub>8</sub>NS) requires *m/z* = 114.0377, found *m/z* = 114.0381.

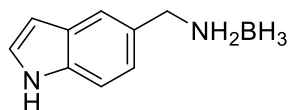

Following the general procedure, reaction time: 24 h.

**2s**: white solid, 39%, melting point: 122-123°C;



**<sup>1</sup>H NMR** (300 MHz, CDCl<sub>3</sub>) δ 8.30 (s, 1H), 7.67 (d, *J* = 8.1 Hz, 1H), 7.41 - 7.23 (m, 2H), 7.03 (d, *J* = 7.9 Hz, 1H), 6.58 (s, 1H), 4.13 - 3.98 (m, 2H), 3.85 (s, 2H);

**<sup>1</sup>H{B} NMR** (400 MHz, DMSO) δ 7.47 (d, *J* = 8.0 Hz, 1H), 7.40 (s, 1H), 7.32 (s, 1H), 7.01 (d, *J* = 8.1 Hz, 1H), 5.58 (s, 2H), 3.72 - 3.63 (m, 2H), 1.42 (s, 3H).;

**<sup>11</sup>B NMR** (128 MHz, DMSO) δ -18.49;

**<sup>11</sup>B{H} NMR** (128 MHz, DMSO) δ -18.55;

**<sup>13</sup>C NMR** (101 MHz, DMSO) δ 130.56, 127.47, 126.07, 120.29, 120.13, 116.82, 111.98, 101.30, 52.99.

**HRMS** (ESI+): exact mass calculated for [M+H]<sup>+</sup> (C<sub>9</sub>H<sub>11</sub>N<sub>2</sub>) requires *m/z* = 147.0922, found *m/z* = 147.0921.

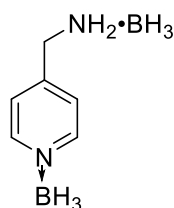

Following the general procedure, reaction time: 5 min.

**2t**: white solid, 66%; melting point: 165-168°C;

**<sup>1</sup>H NMR** (400 MHz, DMSO) δ 8.55 (d, *J* = 6.5 Hz, 2H), 7.70 (d, *J* = 6.6 Hz, 2H), 5.96 (s, 2H), 3.86 - 3.74 (m, 2H);

**<sup>1</sup>H{B} NMR** (400 MHz, DMSO) δ 8.55 (d, *J* = 6.4 Hz, 2H), 7.70 (d, *J* = 6.4 Hz, 2H), 5.95 (s, 2H), 3.82 - 3.77 (m, 2H), 2.46 (s, 3H), 1.38 (t, *J* = 3.6 Hz, 3H);

**<sup>11</sup>B NMR** (96 MHz, DMSO) δ -19.37 (q, *J* = 94.1 Hz); -18.35 (q, *J* = 118.1 Hz);

**<sup>11</sup>B{H} NMR** (128 MHz, DMSO) δ -19.33, -18.51;

**<sup>13</sup>C NMR** (101 MHz, DMSO) δ 150.91, 149.92, 147.27, 125.78, 123.69, 50.14.

**HRMS** (ESI+): exact mass calculated for [M+Na]<sup>+</sup> (C<sub>6</sub>H<sub>8</sub>N<sub>2</sub>Na) requires *m/z* = 131.0585, found *m/z* = 131.0590.

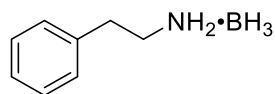

Following the general procedure, reaction time: 10 h.

**2u**: yellow oil, 65%;

**<sup>1</sup>H NMR** (300 MHz, CDCl<sub>3</sub>) δ 7.36 (t, *J* = 7.2 Hz, 2H), 7.32 - 7.25 (m, 1H), 7.22 (d, *J* = 7.0 Hz, 2H), 3.63 (s, 2H), 3.10 (dt, *J* = 13.2, 6.6 Hz, 2H), 2.95 (t, *J* = 6.6 Hz, 2H);

**<sup>1</sup>H{B} NMR** (600 MHz, CDCl<sub>3</sub>) δ 7.33 (t, *J* = 7.3 Hz, 2H), 7.26 (t, *J* = 6.8 Hz, 1H), 7.20 (d, *J* = 7.2 Hz, 2H), 3.64 (s, 2H), 3.11 - 3.02 (m, 2H), 2.93 (s, 2H), 1.50 (s, 3H);

**<sup>11</sup>B NMR** (193 MHz, CDCl<sub>3</sub>) δ -19.42 (q, *J* = 92.6 Hz);

**<sup>11</sup>B{H} NMR** (193 MHz, CDCl<sub>3</sub>) δ -19.43;

**<sup>13</sup>C NMR** (151 MHz, CDCl<sub>3</sub>) δ 136.83, 129.17, 128.78, 127.29, 49.42, 34.62.

**HRMS** (ESI+): exact mass calculated for [M+H]<sup>+</sup> (C<sub>8</sub>H<sub>12</sub>N) requires *m/z* = 122.0970, found *m/z* = 122.0972.

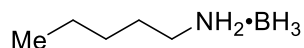

Following the general procedure, reaction time: 40 h.

**2v**: white solid, 61%, melting point: 103-105°C;

**<sup>1</sup>H NMR** (400 MHz, DMSO) δ 5.08 (s, 2H), 1.51 – 1.44 (m, 2H), 1.23 (s, 6H), 0.85 (t, *J* = 5.8 Hz, 3H).

**<sup>1</sup>H{B} NMR** (400 MHz, DMSO) δ 5.09 (s, 2H), 1.49 (s, 2H), 1.27 (s, 9H), 0.88 (dd, *J* = 13.5, 6.7 Hz, 3H).

**<sup>11</sup>B NMR** (128 MHz, DMSO) δ -19.50 (m, *J* = 74.2 Hz);

**<sup>11</sup>B{H} NMR** (128 MHz, DMSO) δ -19.52;

**<sup>13</sup>C NMR** (101 MHz, DMSO) δ 48.22, 28.91, 28.11, 22.27, 14.24.

**HRMS** (ESI+): exact mass calculated for [M+H]<sup>+</sup> (C<sub>5</sub>H<sub>14</sub>N) requires *m/z* = 88.1126, found *m/z* = 88.1126.

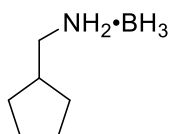

Following the general procedure, reaction time: 40 h.

**2w**: white solid, 61%; melting point: 106-107°C;

**<sup>1</sup>H NMR** (400 MHz, DMSO) δ 5.06 (s, 2H), 2.36 (s, 2H), 2.01 (d, *J* = 7.0 Hz, 1H), 1.68 (s, 2H), 1.48 (dd, *J* = 21.2, 8.6 Hz, 4H), 1.11 (s, 2H);

**<sup>1</sup>H{B} NMR** (400 MHz, DMSO) δ 5.04 (s, 2H), 2.36 (s, 2H), 2.02 (s, 1H), 1.69 (s, 2H), 1.50 (d, *J* = 25.7 Hz, 4H), 1.29 (s, 3H), 1.11 (s, 2H);

**<sup>11</sup>B NMR** (128 MHz, DMSO) δ -19.20 (m, *J* = 67.8 Hz);

**<sup>11</sup>B{H} NMR** (128 MHz, DMSO) δ -19.20;

**<sup>13</sup>C NMR** (101 MHz, DMSO) δ 53.60, 38.99, 30.57, 25.08.

**HRMS** (ESI+): exact mass calculated for [M+Na]<sup>+</sup> (C<sub>6</sub>H<sub>13</sub>NNa) requires *m/z* = 122.0946, found *m/z* = 122.0941.

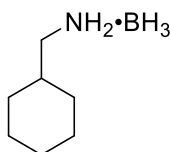

Following the general procedure, reaction time: 40 h.

**2x**: white solid, 65%; melting point: 90-92°C;

**<sup>1</sup>H NMR** (400 MHz, DMSO) δ 5.02 (s, 2H), 2.26 (s, 2H), 1.67 (dd, *J* = 26.3, 11.1 Hz, 4H), 1.47 (s, 1H), 1.15 (d, *J* = 13.6 Hz, 4H), 0.83 (d, *J* = 11.5 Hz, 2H).

**<sup>1</sup>H{B} NMR** (400 MHz, DMSO) δ 5.00 (s, 2H), 2.26 (s, 2H), 1.67 (dd, *J* = 25.4, 11.5 Hz, 4H), 1.48 (s, 1H), 1.28 (s, 3H), 1.23 – 0.99 (m, 4H), 0.81 (q, *J* = 11.2 Hz, 2H).

**<sup>11</sup>B NMR** (128 MHz, DMSO) δ -19.19;

**<sup>11</sup>B{H} NMR** (128 MHz, DMSO) δ -19.13;

**<sup>13</sup>C NMR** (101 MHz, DMSO) δ 54.90, 36.70, 30.77, 26.35, 25.78.

**HRMS** (ESI+): exact mass calculated for  $[M+H]^+$  ( $C_7H_{16}N$ ) requires  $m/z = 114.1283$ , found  $m/z = 114.1282$ .

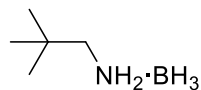

Following the general procedure, reaction time: 20 h.

**2y**: white solid, 59%, melting point: 130-132°C;

**<sup>1</sup>H NMR** (400 MHz, DMSO)  $\delta$  4.93 (s, 2H), 2.35 - 2.17 (m, 2H), 0.87 (s, 9H);

**<sup>1</sup>H{B} NMR** (400 MHz, DMSO)  $\delta$  4.93 (s, 2H), 2.35 - 2.17 (m, 2H), 1.35 (s, 3H), 0.87 (s, 9H).

**<sup>11</sup>B NMR** (128 MHz, DMSO)  $\delta$  -18.44 (m,  $J = 85.8$ Hz);

**<sup>11</sup>B{H} NMR** (128 MHz, DMSO)  $\delta$  -18.43;

**<sup>13</sup>C NMR** (101 MHz, DMSO)  $\delta$  60.80, 31.29, 27.67.

**HRMS** (ESI+): exact mass calculated for  $[M+Na]^+$  ( $C_5H_{13}NNa$ ) requires  $m/z = 110.0946$ , found  $m/z = 110.0945$ .

### 3. One-Pot synthesis of primary amines

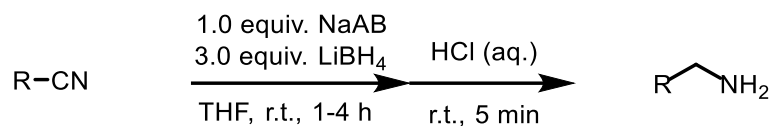

In an argon-filled glovebox, sodium amidoborane (0.2 mmol), lithium borohydride (0.6 mmol) were added in a 10-ml Schlenk flask and then the flask was removed out of the box. THF (4 ml) and nitriles (0.2 mmol) were added sequentially to the flask under N<sub>2</sub>. Then the reaction mixture was allowed to stirred at room temperature. After completion of the reaction indicated by TLC. 1 mL aqueous solution of HCl (wt%: 36%) was added to the reaction mixture. The mixture was allowed to stir for 5 minutes and then 10 mL saturated NaHCO<sub>3</sub> (aq.) was added into the mixture, followed by extraction with ethyl acetate and water. The organic mixture was concentrated under reduced pressure and purified by silica gel flash chromatography with 1:1 petroleum ether: ethyl acetate to give hydrolysis product.

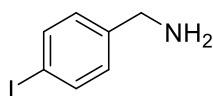

Following the general procedure, reaction time: 1 h.

**3a<sup>6</sup>**: white solid, 78%

**<sup>1</sup>H NMR** (400 MHz, DMSO)  $\delta$  7.64 (d,  $J$  = 8.1 Hz, 2H), 7.14 (d,  $J$  = 8.1 Hz, 2H), 3.69 (d,  $J$  = 24.3 Hz, 2H), 3.14 (s, 2H);

**<sup>13</sup>C NMR** (101 MHz, DMSO)  $\delta$  144.26, 137.21, 130.02, 92.16, 45.38.

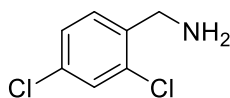

Following the general procedure, reaction time: 5 min.

**3b<sup>7</sup>**: white solid, 88%

**<sup>1</sup>H NMR** (400 MHz, CDCl<sub>3</sub>)  $\delta$  7.57 - 7.03 (m, 3H), 3.91 (s, 2H), 1.62 (s, 2H);

**<sup>13</sup>C NMR** (101 MHz, CDCl<sub>3</sub>)  $\delta$  139.16, 133.94, 133.13, 129.72, 129.29, 127.29, 43.90.

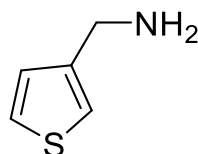

Following the general procedure, reaction time: 4h.

**3c<sup>8</sup>**: yellow oil, 77%

**<sup>1</sup>H NMR** (400 MHz, CDCl<sub>3</sub>) δ 7.22 (dd, *J* = 4.8, 2.9 Hz, 1H), 7.20 (s, 1H), 7.01 (t, *J* = 5.8 Hz, 1H), 3.78 (s, 2H), 2.18 (s, 2H).

**<sup>13</sup>C NMR** (101 MHz, CDCl<sub>3</sub>) δ 127.68, 126.32, 125.86, 122.05, 47.92.

#### 4. Synthesis of secondary amines through reductive amination

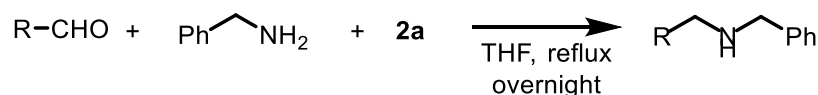

Aldehyde (0.5mmol), benzyl amine-borane (0.5 mmol) were added in a 10-ml reaction flask. THF (3 ml) and benzylamine (0.55mmol) were added sequentially to the flask. Then the reaction mixture was allowed to stirred overnight under reflux condition. After completion of the reaction indicated by TLC, volatiles was then evaporated under reduced pressure and the residue was purified by flash chromatography on aluminum oxide. (petroleum ether: ethyl acetate = 1:1)

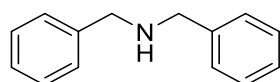

**4a<sup>9</sup>**: yellow oil, 56%

**<sup>1</sup>H NMR** (400 MHz, CDCl<sub>3</sub>) δ 7.65 - 7.22 (m, 10H), 3.91 (s, 4H), 1.72 (s, 1H).

**<sup>13</sup>C NMR** (101 MHz, CDCl<sub>3</sub>) δ 140.48, 128.50, 128.26, 127.04, 53.28.

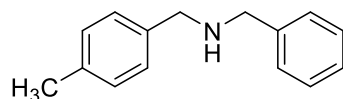

**4b<sup>9</sup>**: yellow oil, 70%

**<sup>1</sup>H NMR** (400 MHz, CDCl<sub>3</sub>) δ 7.55 - 7.16 (m, 9H), 3.89 (d, *J* = 4.4 Hz, 2H), 3.86 (s, 2H), 2.44 (s, 3H).

**<sup>13</sup>C NMR** (101 MHz, CDCl<sub>3</sub>) δ 140.44, 137.33, 136.57, 129.18, 128.48, 128.27, 128.23, 127.02, 53.16, 21.20.

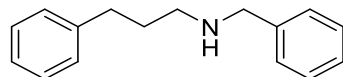

**4c<sup>10</sup>**: white solid, 70%

**<sup>1</sup>H NMR** (400 MHz, CDCl<sub>3</sub>) δ 7.46 - 7.20 (m, 10H), 3.84 (s, 2H), 2.83 - 2.66 (m, 4H), 1.97 - 1.86 (m, 2H), 1.62 (s, 1H).

**<sup>13</sup>C NMR** (101 MHz, CDCl<sub>3</sub>) δ 140.27, 132.01, 129.96, 128.98, 128.94, 128.50, 128.37, 126.20, 51.19, 45.99, 32.85, 28.06.

## 5. Preliminary mechanism study:

### a) Reaction with NaNHMe·BH<sub>3</sub>

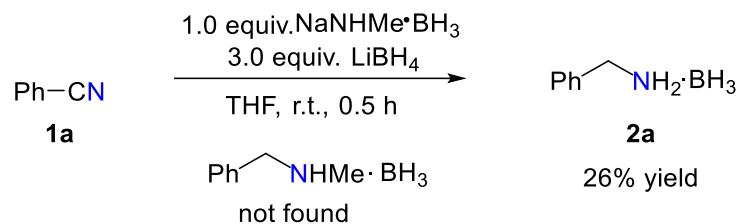

In an argon-filled glovebox, NaNHMeBH<sub>3</sub> (0.2 mmol), LiBH<sub>4</sub> (0.6 mmol) were added in a 10-ml Schlenk flask and then the flask was removed out of the box. THF (4 ml) and nitriles (0.2 mmol) were added sequentially to the flask under N<sub>2</sub>. Then the reaction mixture was allowed to stirred at room temperature. After completion of the reaction indicated by TLC, volatiles were then evaporated under reduced pressure and the residue was purified by flash chromatography on aluminum oxide. (petroleum ether: ethyl acetate = 4:1)

### b) Reaction with NaNH<sub>2</sub>·BD<sub>3</sub>

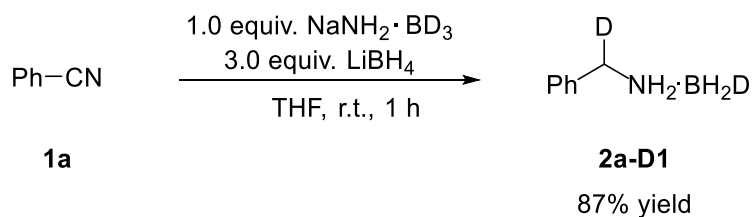

In an argon-filled glovebox, sodium NaNH<sub>2</sub>BD<sub>3</sub> (0.2 mmol), LiBH<sub>4</sub> (0.6 mmol) were added in a 10-ml Schlenk flask and then the flask was removed out of the box. THF (4 ml) and nitriles (0.2 mmol) were added sequentially to the flask under N<sub>2</sub>. Then the reaction mixture was allowed to stirred at room temperature. After completion of the reaction indicated by TLC, volatiles were then evaporated under reduced pressure and the residue was purified by flash chromatography on aluminum oxide. (petroleum ether: ethyl acetate = 4:1)

259-NaBH<sub>4</sub>D<sub>2</sub>O  
259-dms<sup>o</sup>-h

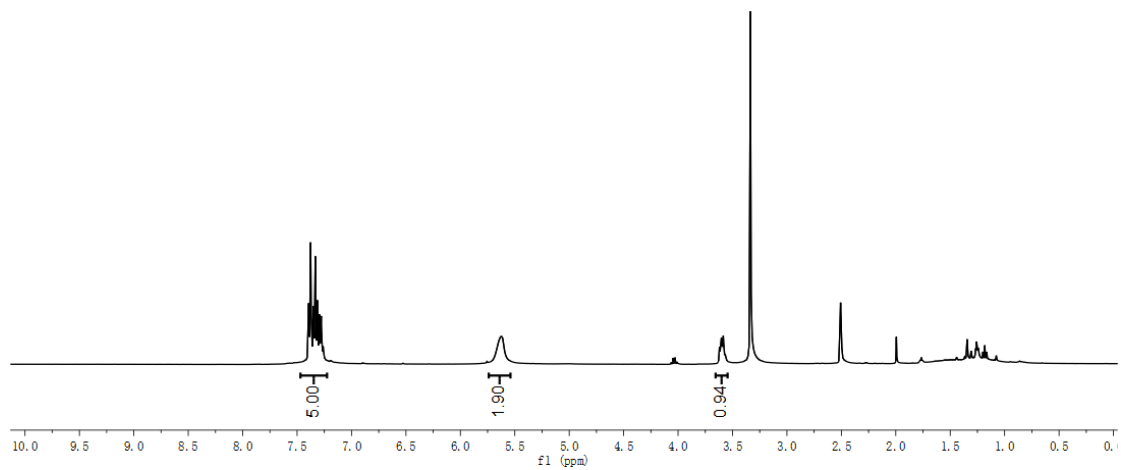

**Figure S1.** The <sup>1</sup>H NMR spectra of **2a-D1** in *d*<sub>6</sub>-DMSO.

259-NaBH<sub>4</sub>D<sub>2</sub>O  
259-dms<sup>o</sup>-h

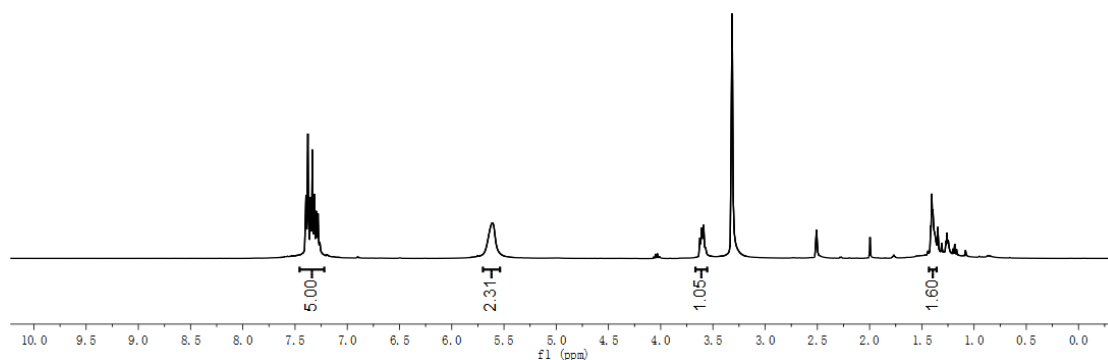

**Figure S2.** The <sup>1</sup>H{B} NMR spectra of **2a-D1** in *d*<sub>6</sub>-DMSO.

c) Reaction with LiBD<sub>4</sub>

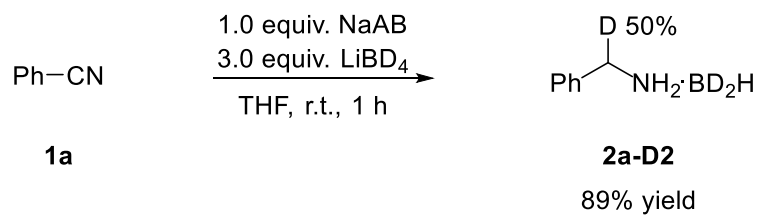

In an argon-filled glovebox, sodium  $\text{NaNH}_2\text{BH}_3$  (0.2 mmol),  $\text{LiBD}_4$  (0.6 mmol) were added in a 10-ml Schlenk flask and then the flask was removed out of the box. THF (4 ml) and nitriles (0.2 mmol) were added sequentially to the flask under  $\text{N}_2$ . Then the reaction mixture was allowed to stirred at room temperature. After completion of the reaction indicated by TLC, volatiles were then evaporated under reduced pressure and the residue was purified by flash chromatography on aluminum oxide. (petroleum ether: ethyl acetate = 4:1)

213-LiBD4  
213-h-dmsd

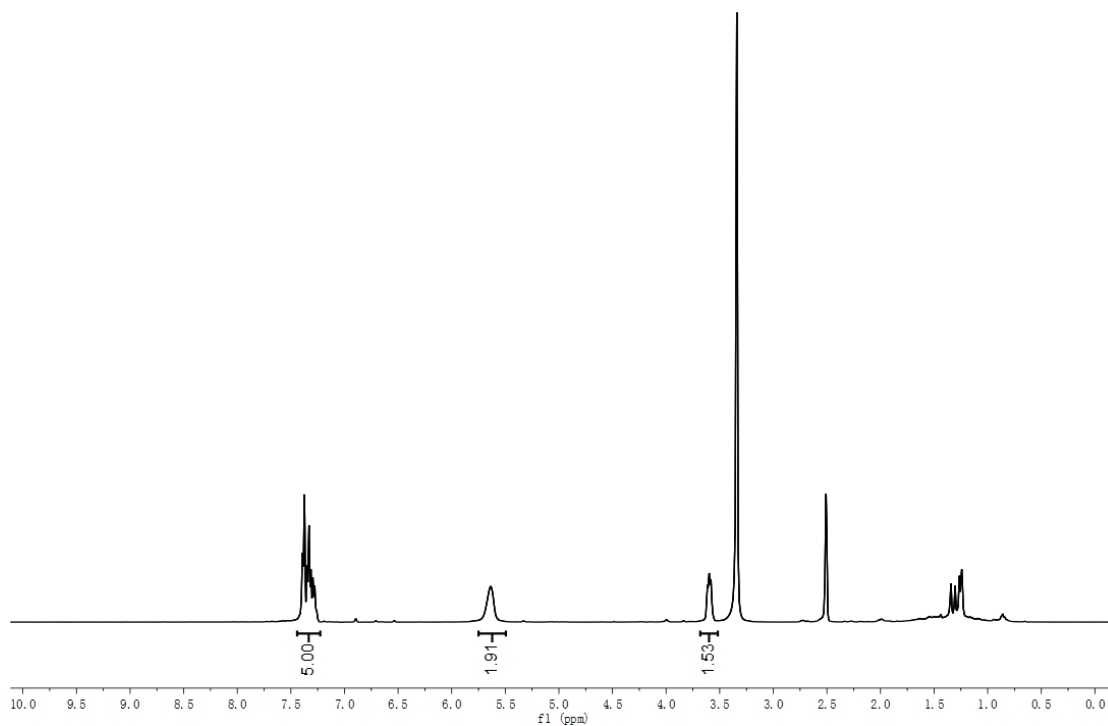

**Figure S3.** The  $^1\text{H}$  NMR spectra of **2a-D2** in  $d_6$ -DMSO.



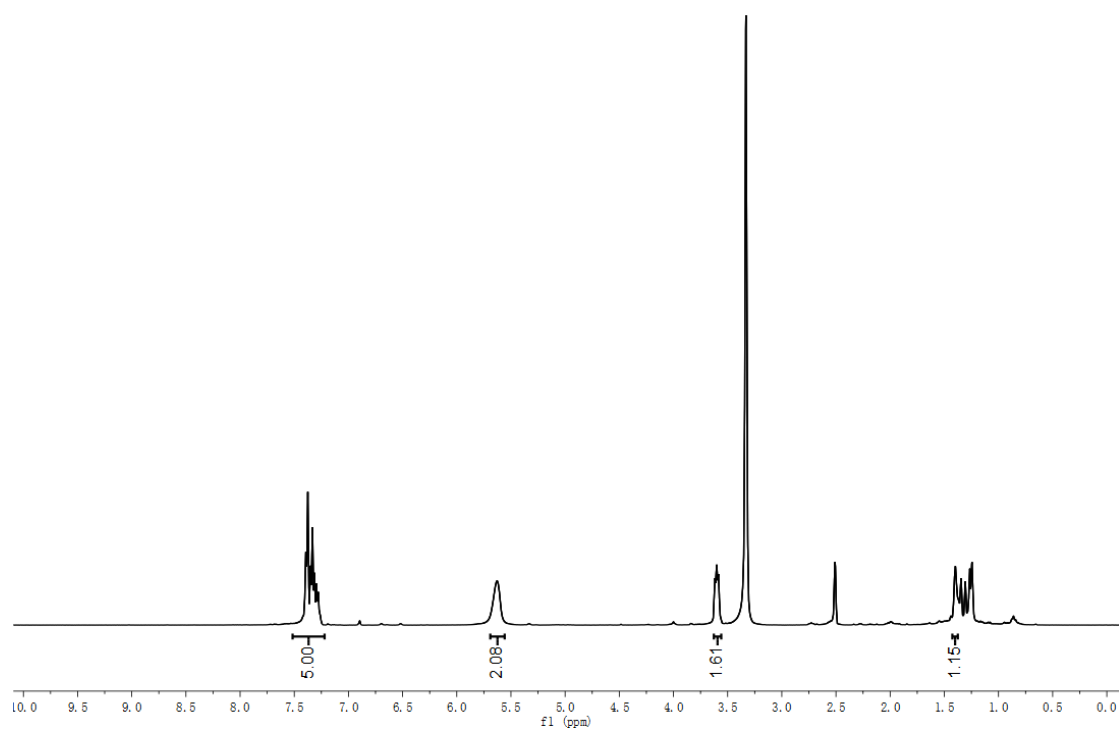

**Figure S4.** The  $^1\text{H}\{\text{B}\}$  NMR spectra of **2a-D2** in  $d_6$ -DMSO.

d) Reaction of diphenylmethanimine and  $\text{LiBD}_4$

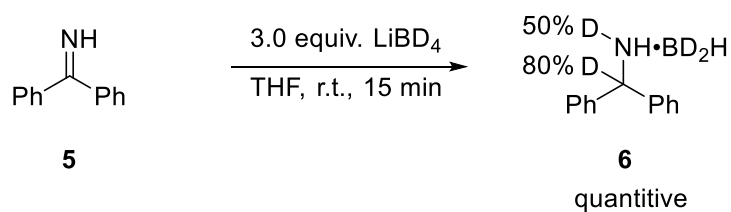

In an argon-filled glovebox,  $\text{LiBD}_4$  (0.6 mmol) were added in a 10-ml Schlenk flask and then the flask was removed out of the box. THF (4 ml) and diphenylmethanimine (0.2 mmol) were added sequentially to the flask under  $\text{N}_2$ . Then the reaction mixture was allowed to stirred at room temperature. After completion of the reaction indicated by TLC, volatiles were then evaporated under reduced pressure and the residue was purified by flash chromatography on aluminum oxide. (petroleum ether: ethyl acetate = 4:1)

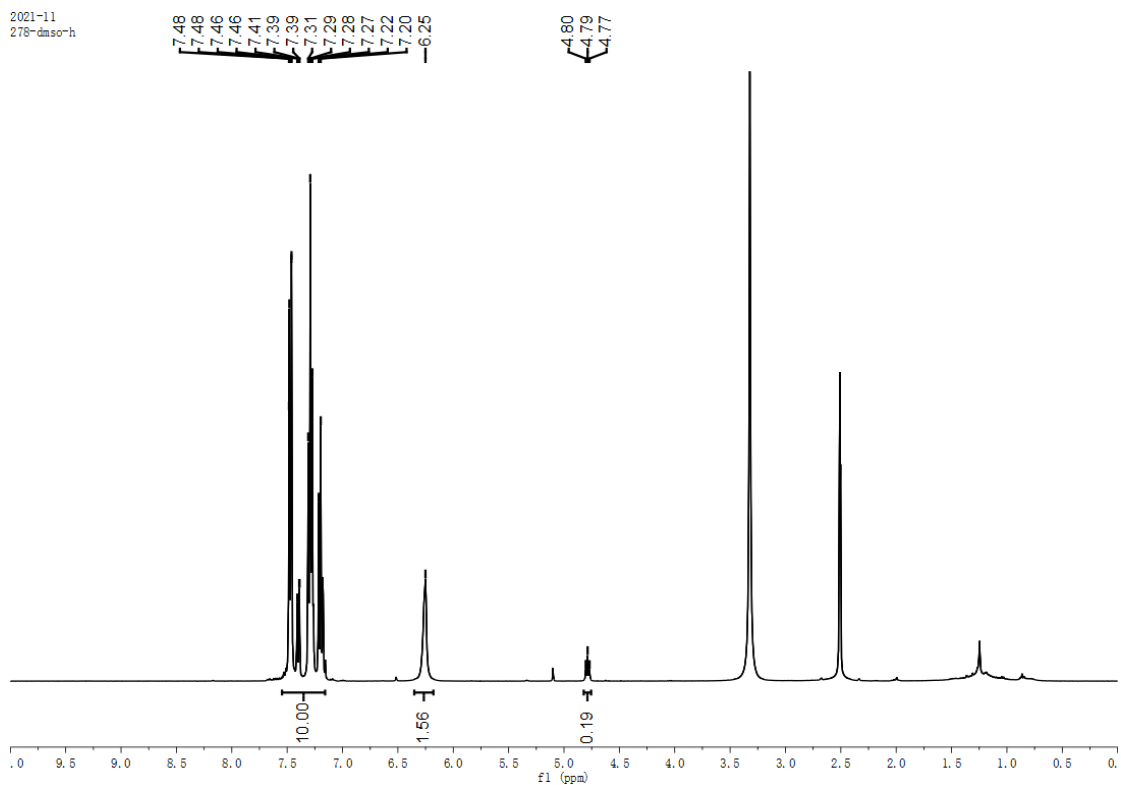

**Figure S5.** The  $^1\text{H}$  NMR spectra of **6** in  $d_6$ -DMSO.

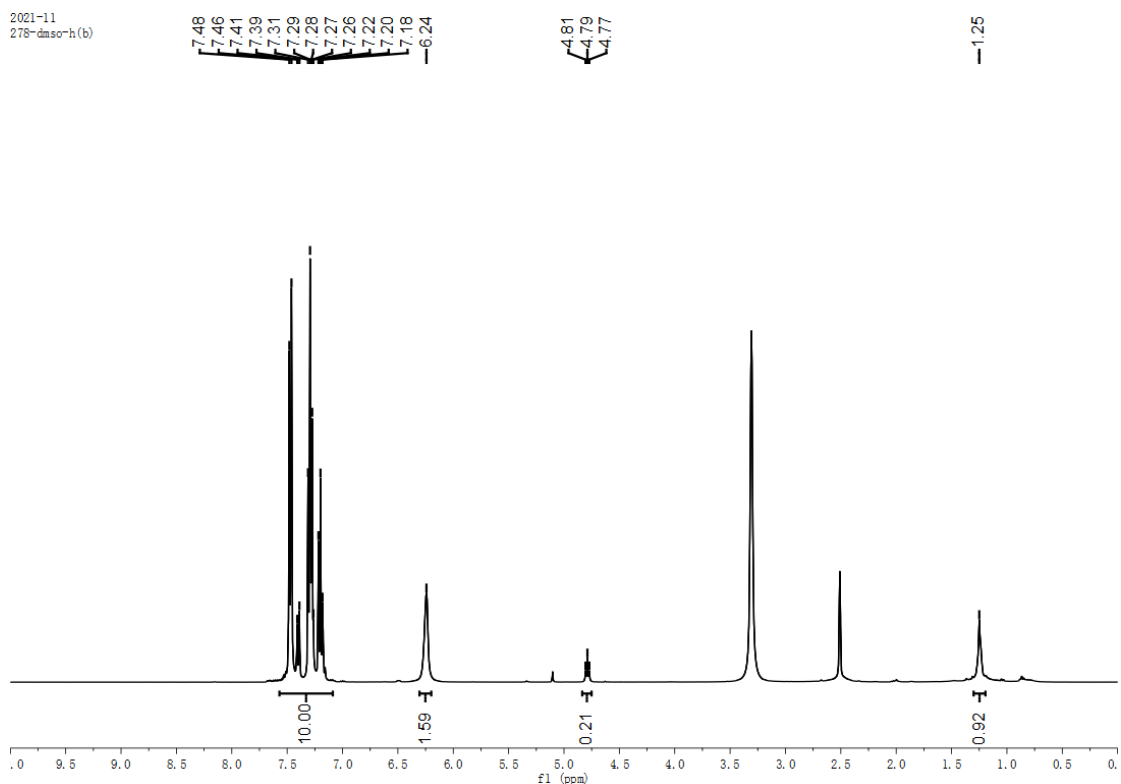

**Figure S6.** The  $^1\text{H}\{\text{B}\}$  NMR spectra of **6** in  $d_6$ -DMSO.

## 6. References

1. J.-C. Lai, X.-Y. Jia, D.-P. Wang, Y.-B. Deng, P. Zhang, C.-H. Li, J.-L. Zuo, Z.-N. Bao, *Nature Commun.*, 2019, **10**, 1164.
2. X.-M. Chen, J. Wang, S. Liu, J. Zhang, D. Wei and X. Chen, *Dalton Trans.*, 2019, **48**, 14984.
3. H. C. Kelly, F. R. Marchelli and M. B. Giusto, *Inorg. Chem.*, 1964, **3**, 431.
4. K. E. Bell, C. R. Kelly, D. E. Minter and H. C. Kelly, *Inorg. Chim. Acta.*, 1993, **2**, 187.
5. K. E. Bell and H. C. Kelly, *Inorg. Chem.*, 1992, **31**, 2665.
6. S. Koushik, D. Kuhali, K. Abhishek, A. Debashi and M. Biplab, *ACS Catal.*, 2021, **11**, 2786.
7. B. Zeynizadeh, F. Mohammad Aminzadeh and H. Mousavi, *Res. Chem. Intermed.*, 2019, **45**, 3329.
8. R. Adam, E. Alberico, W. Baumann, H. J. Drexler, R. Jackstell, H. Junge and M. Beller, *Chem. Eur. J.*, 2016, **22**, 4991.
9. J. H. Cho, S. Byun, A. Cho and B. M. Kim, *Catal. Sci. Technol.*, 2020, **10**, 4201.
10. Z. Luo, Y. Pan, Z. Yao, J. Yang, X. Zhang, X. Liu, L. Xu and Q. Fan, *Green. Chem.*, 2021, **23**, 5205.

## 7. NMR spectra:

苯胺pengwan  
bienenpengwan-dmsol-h

7.40  
7.38  
7.35  
7.33  
7.32  
7.30  
7.28

5.67

3.62  
3.61  
3.59

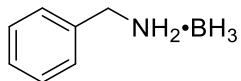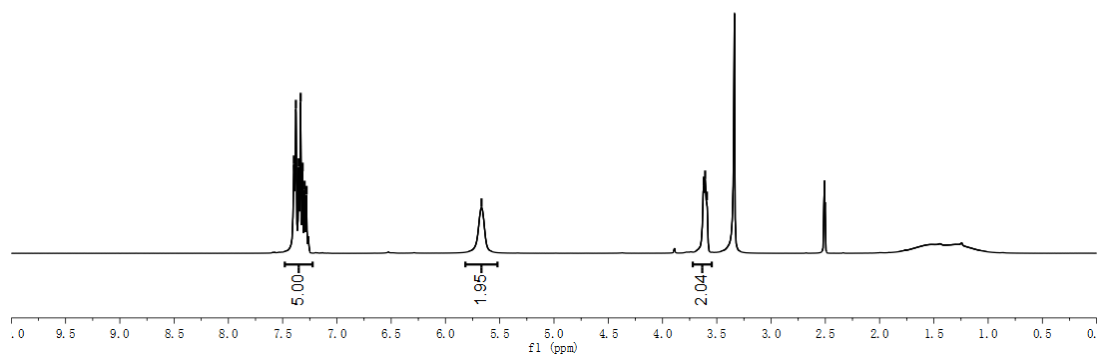

Figure S7. <sup>1</sup>H NMR spectrum of 2a (400 MHz, DMSO)

苯胺pengwan  
bienenpengwan-dmsol-h(b)

7.40  
7.38  
7.35  
7.34  
7.32  
7.30  
7.28

5.65

3.61

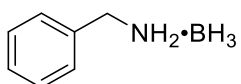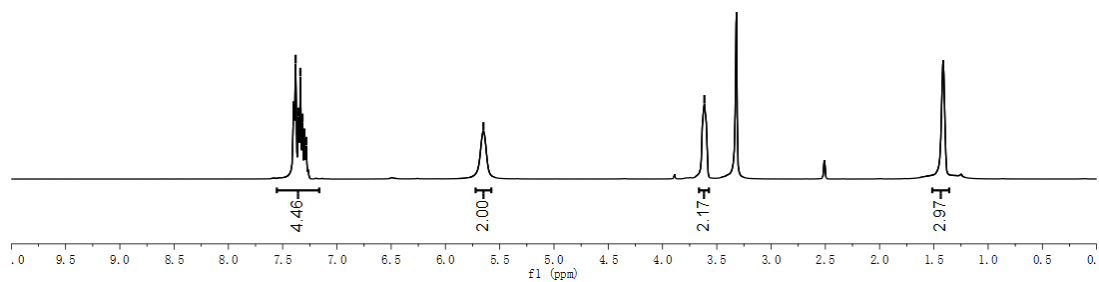

Figure S8. <sup>1</sup>H{B} NMR spectrum of 2a (400 MHz, DMSO)

20211114pjm  
biananpengwan-b

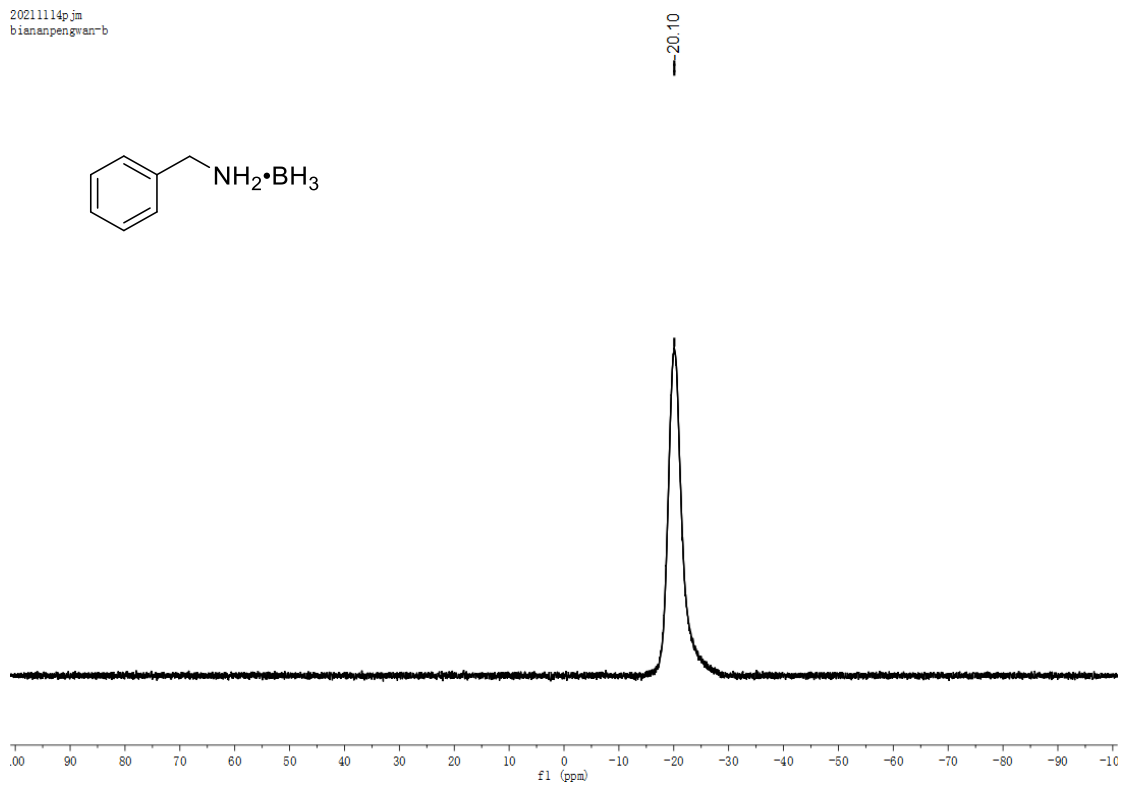

Figure S9.  $^{11}\text{B}$  NMR spectrum of **2a** (400 MHz, DMSO)

20211114pjm  
biananpengwan-dmsob(h)

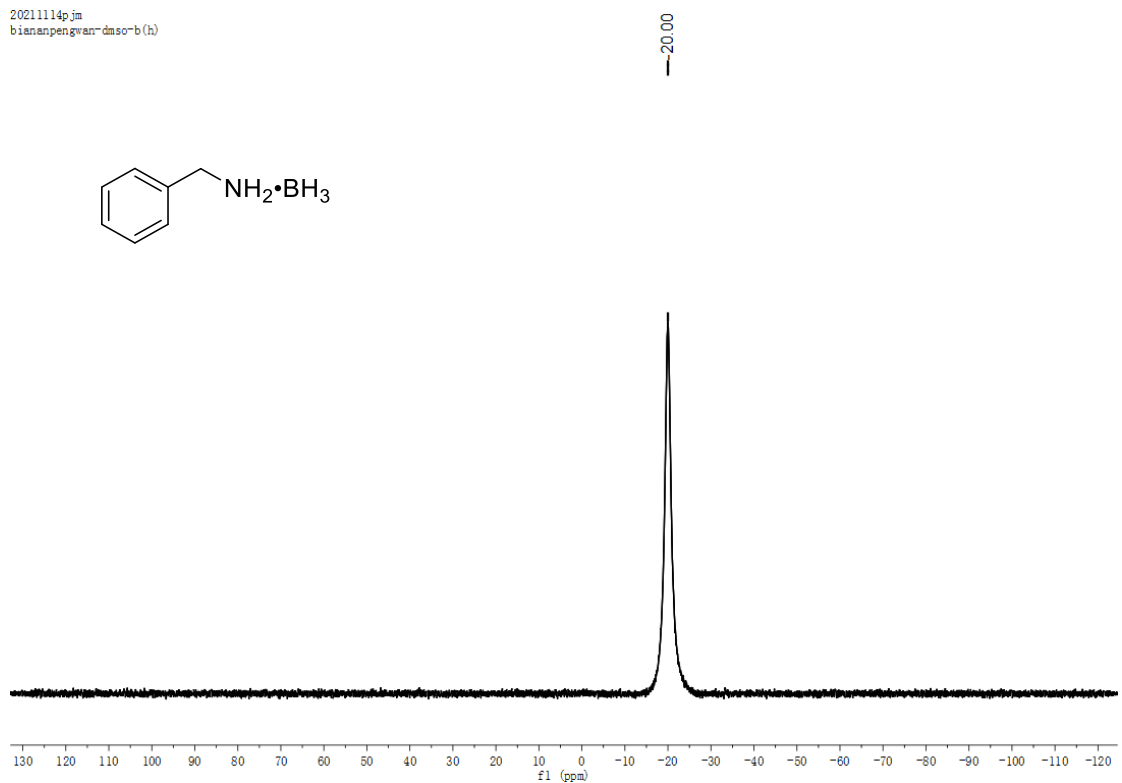

Figure S10.  $^{11}\text{B}\{^1\text{H}\}$  NMR spectrum of **2a** (400 MHz, DMSO)

20211114p.jm  
biananpengwan@dmsoc

137.81  
128.95  
128.66  
127.87

52.19

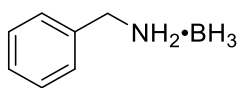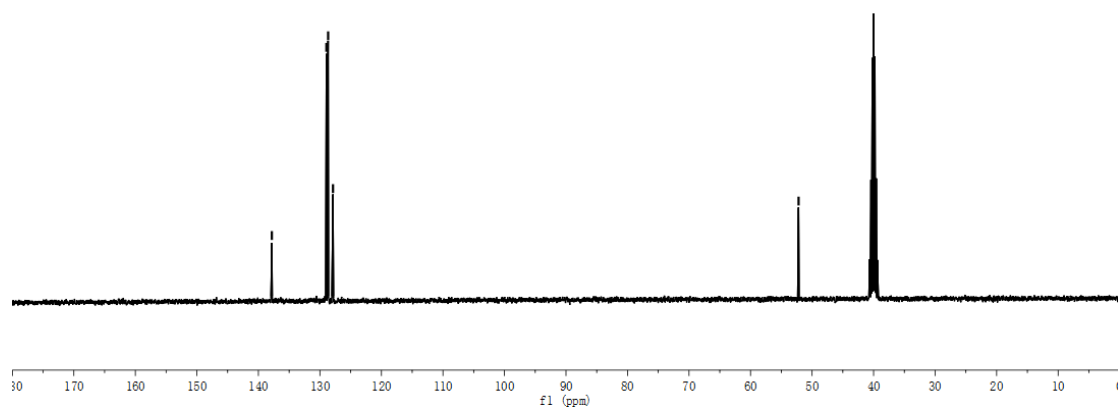

**Figure S11.** <sup>13</sup>C NMR spectrum of **2a** (400 MHz, DMSO)

20211109-剩余图谱  
108-dmsc-h

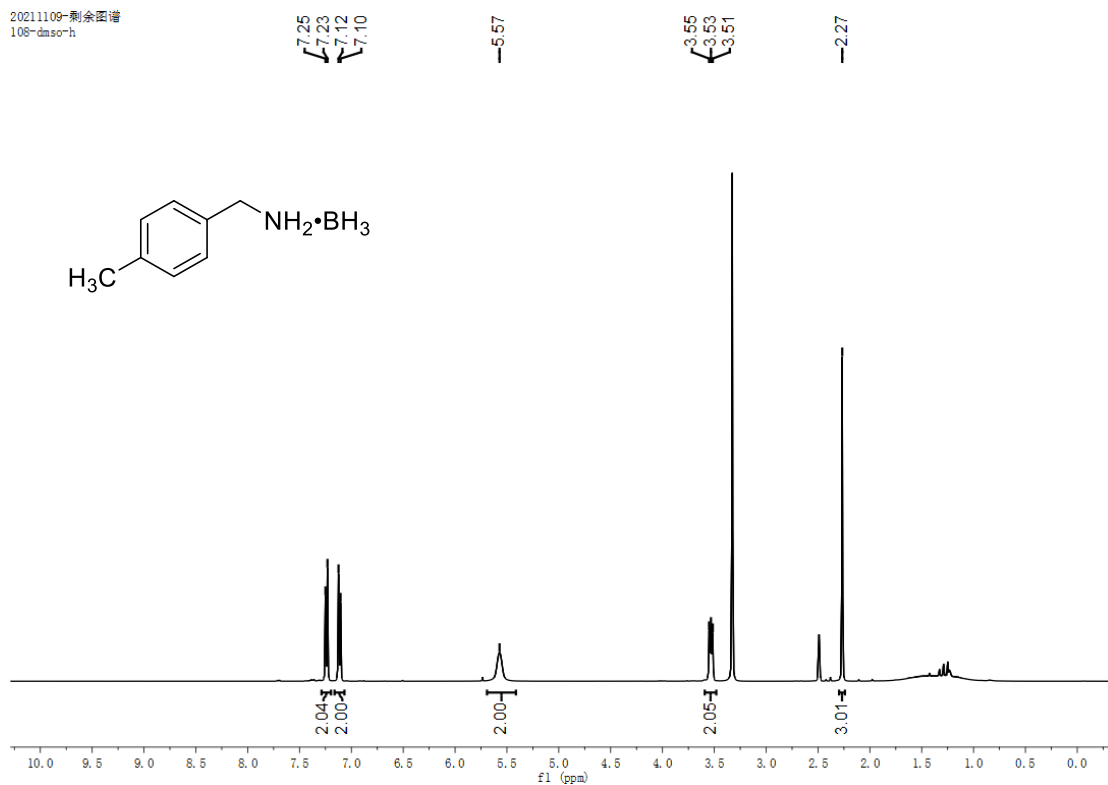

Figure S12. <sup>1</sup>H NMR spectrum of 2b (400 MHz, DMSO)

20211109-剩余图谱  
108-dmsc-h(b)

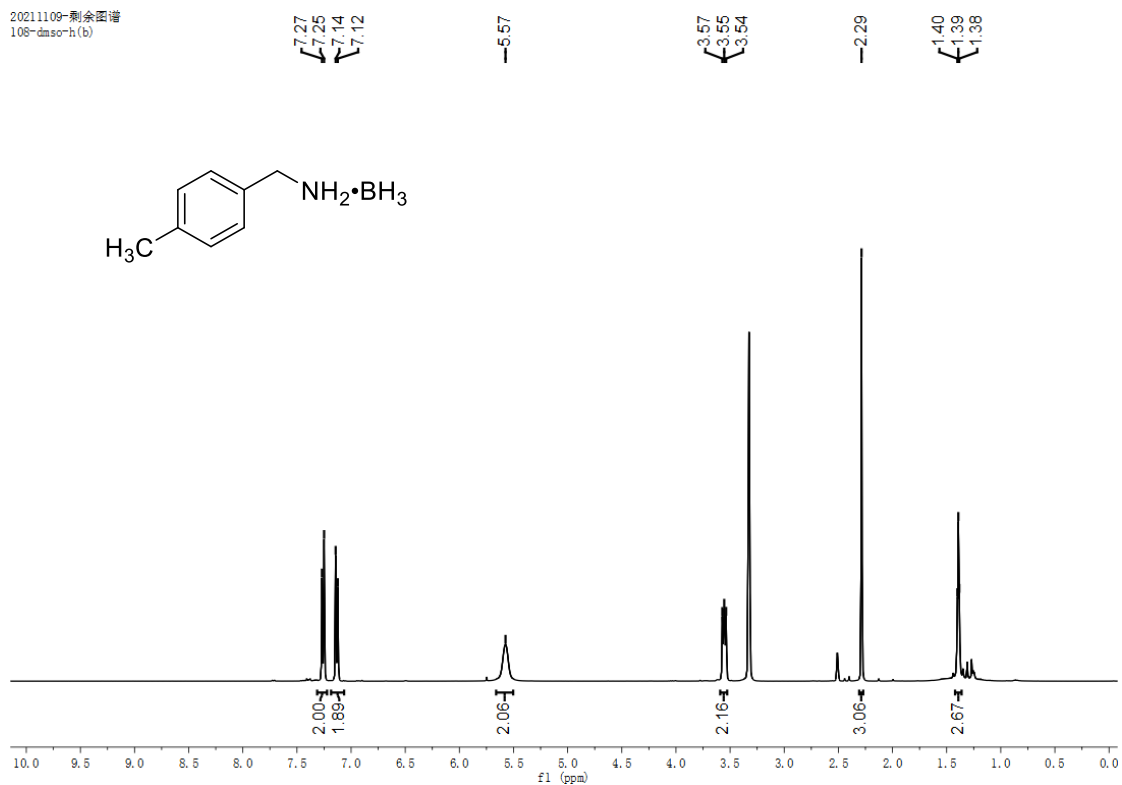

Figure S13. <sup>1</sup>H{B} NMR spectrum of 2b (400 MHz, DMSO)

108-B

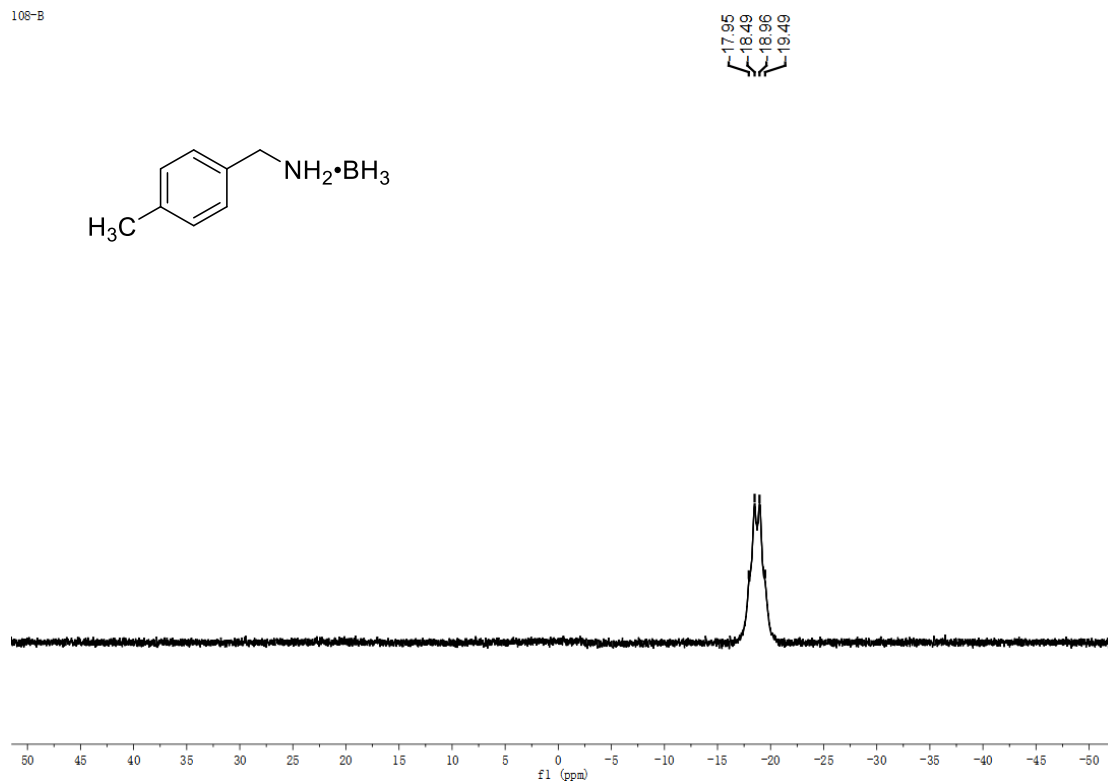

Figure S14. <sup>1</sup>H{B} NMR spectrum of 2b (400 MHz, DMSO)

108-B{H}

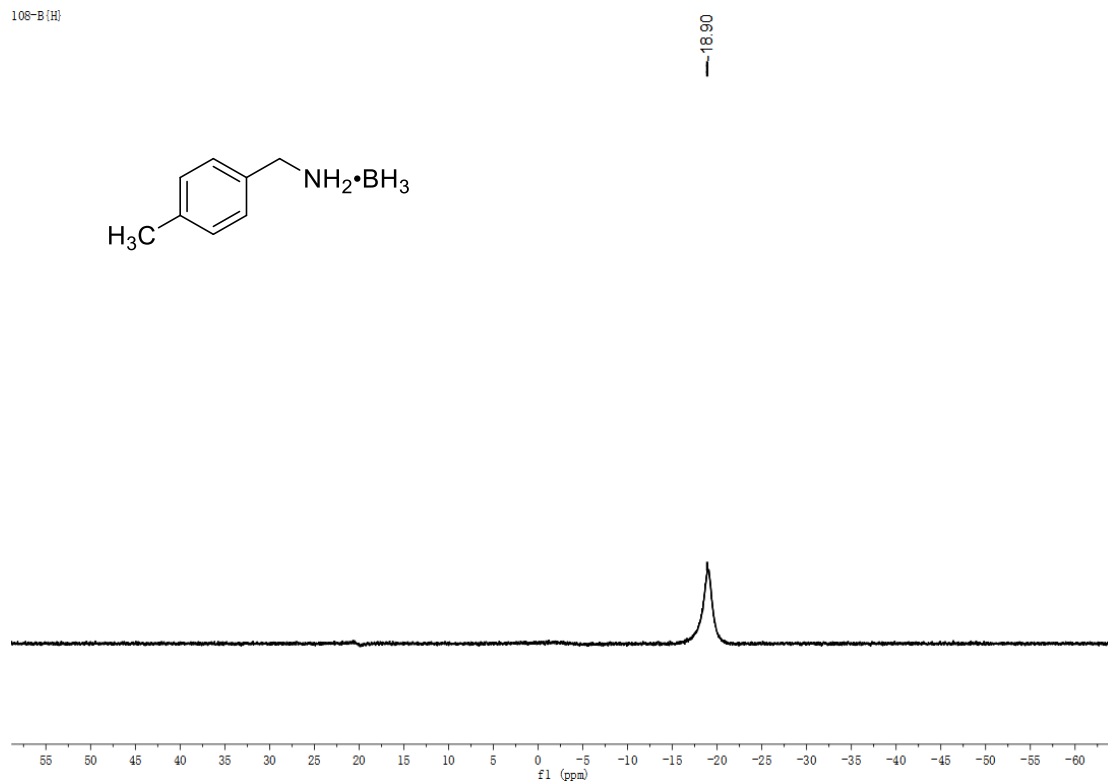

Figure S15. <sup>11</sup>B{H} NMR spectrum of 2b (400 MHz, DMSO)



108-C

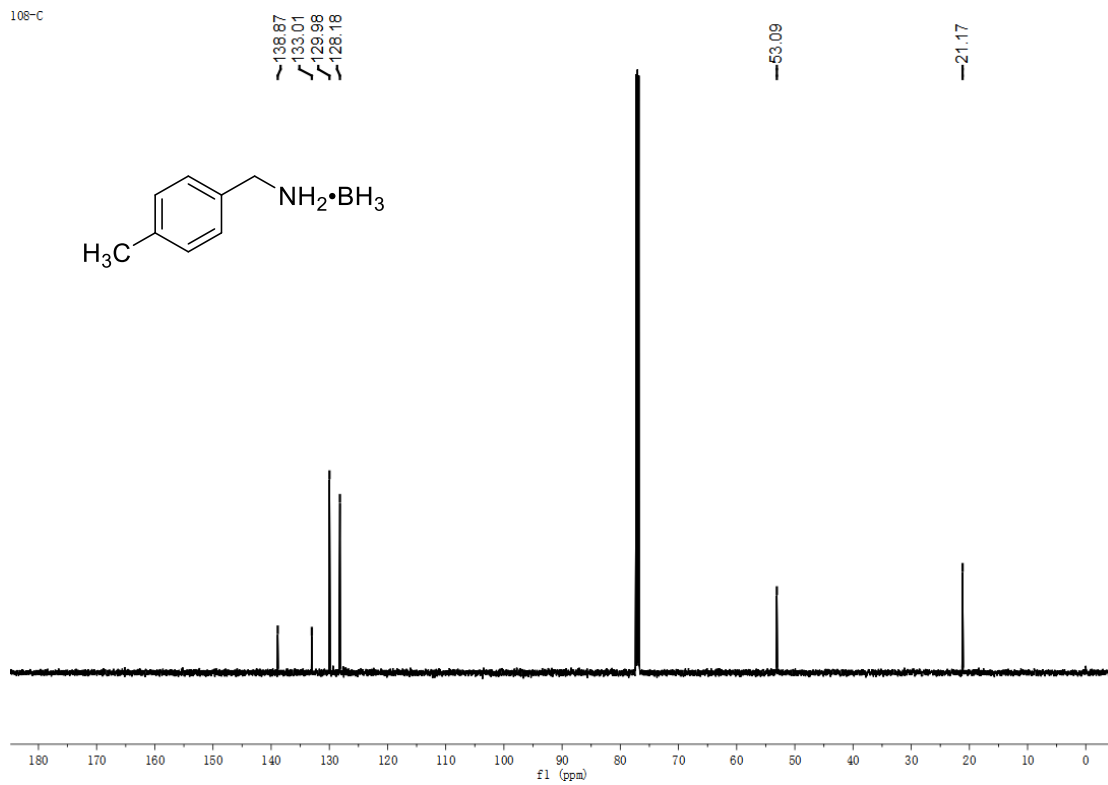

**Figure S16.** <sup>13</sup>C NMR spectrum of **2b** (400 MHz, DMSO)

129  
129  
6.7  
H

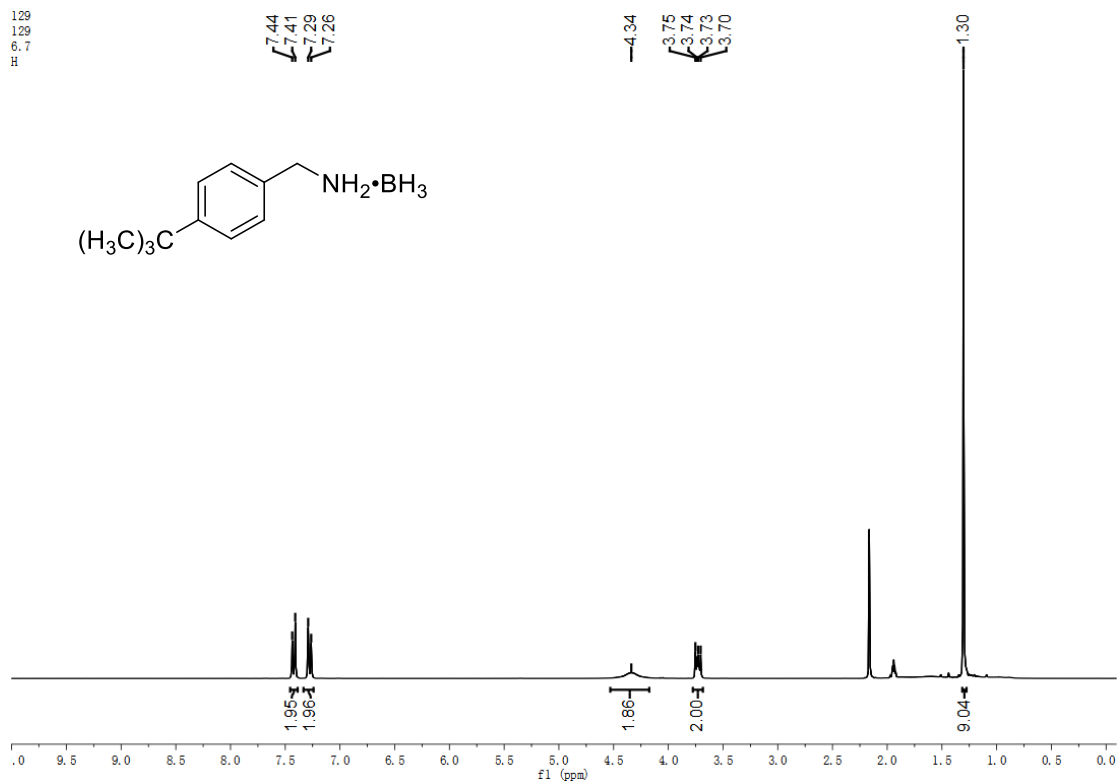

Figure S17. <sup>1</sup>H NMR spectrum of 2c (300 MHz, DMSO)

chenxuenian  
129  
H(B)  
CD3CN  
PROB11DEC CD3CN (D:\data) ZXM 9

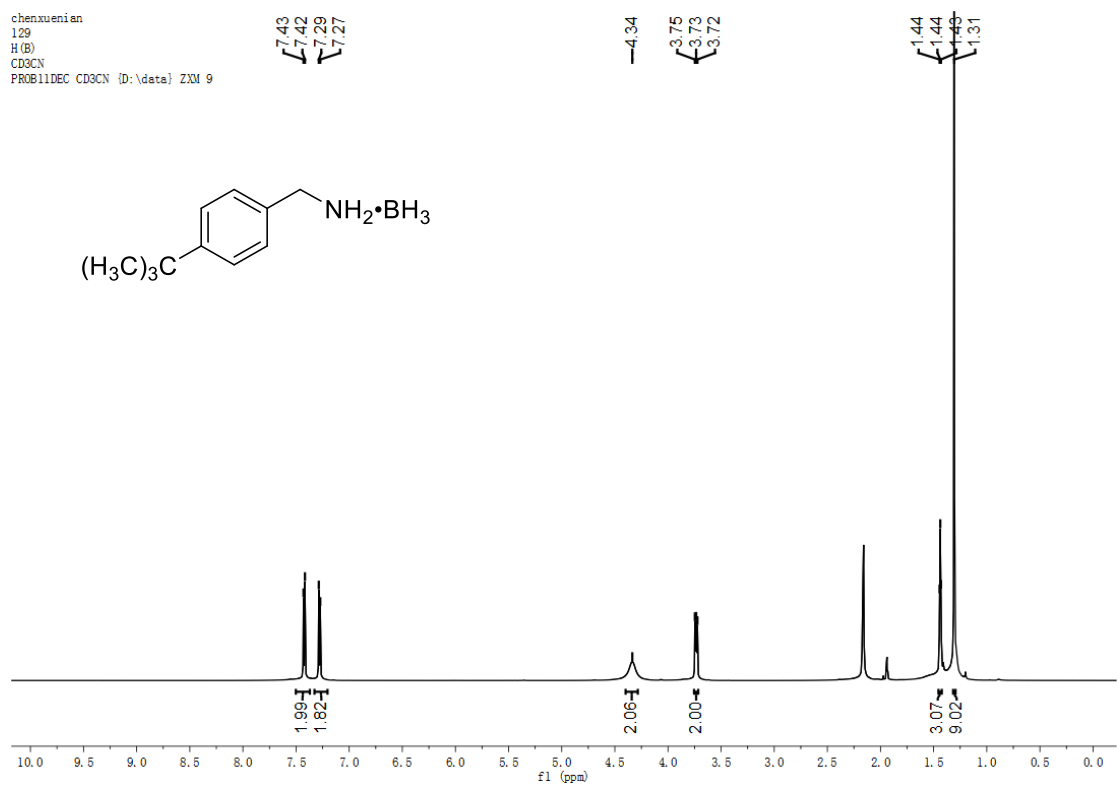

Figure S18. <sup>1</sup>H{B} NMR spectrum of 2c (600 MHz, DMSO)

chenxuenian  
129  
B  
CD3CN  
B112G-ZZU CD3CN (D:\data) ZXM 9

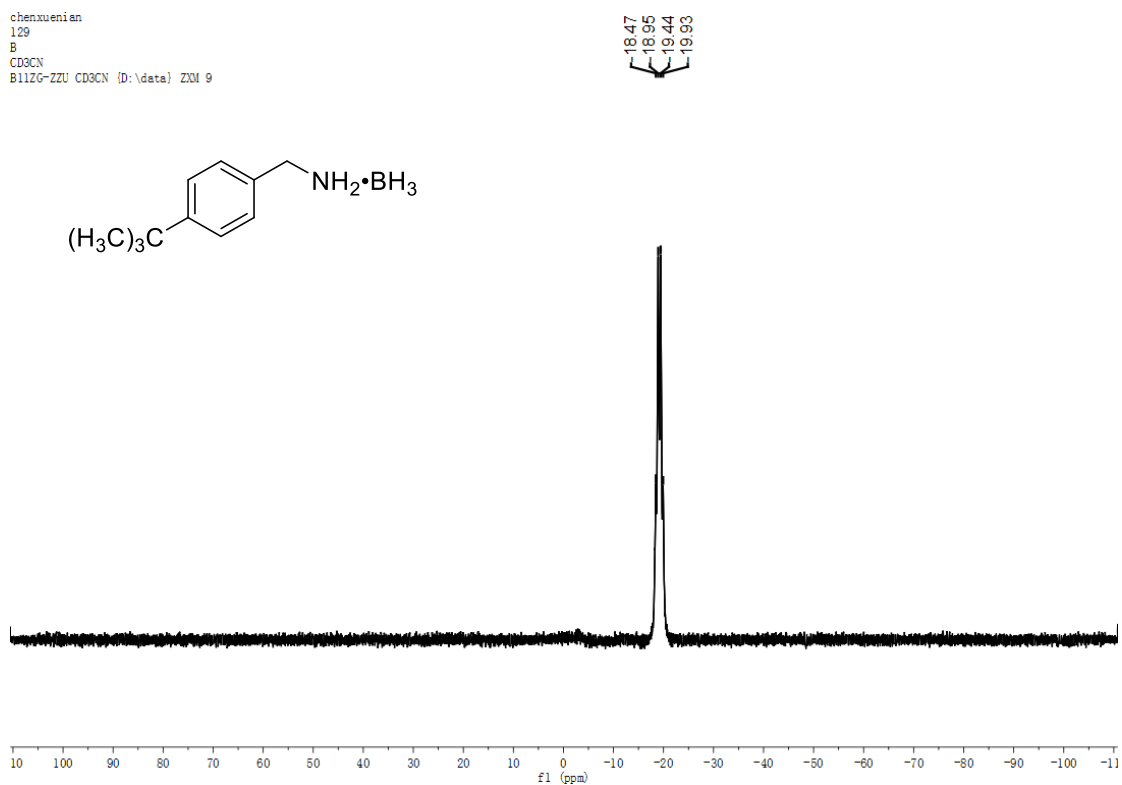

Figure S19.  $^{11}\text{B}$  NMR spectrum of **2c** (600 MHz, DMSO)

chenxuenian  
129  
B (H)  
CD3CN  
B11CF0-ZZU CD3CN (D:\data) ZXM 9

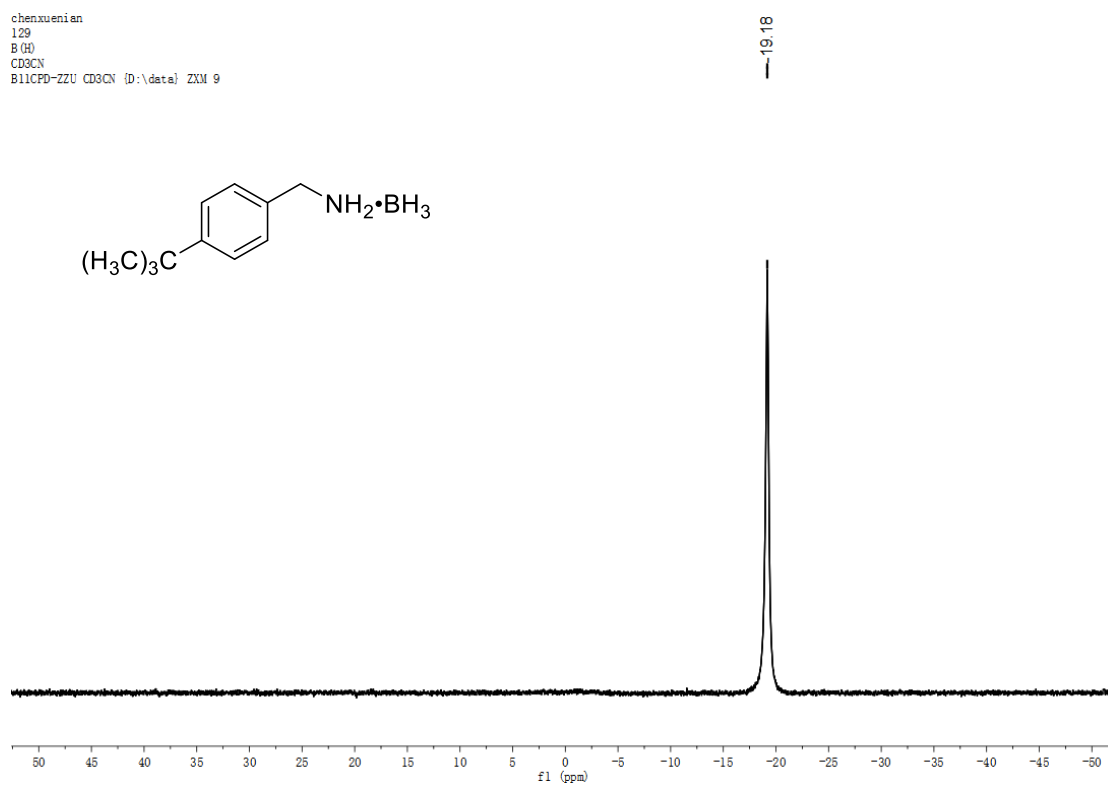

Figure S20.  $^{11}\text{B}\{\text{H}\}$  NMR spectrum of **2c** (600 MHz, DMSO)

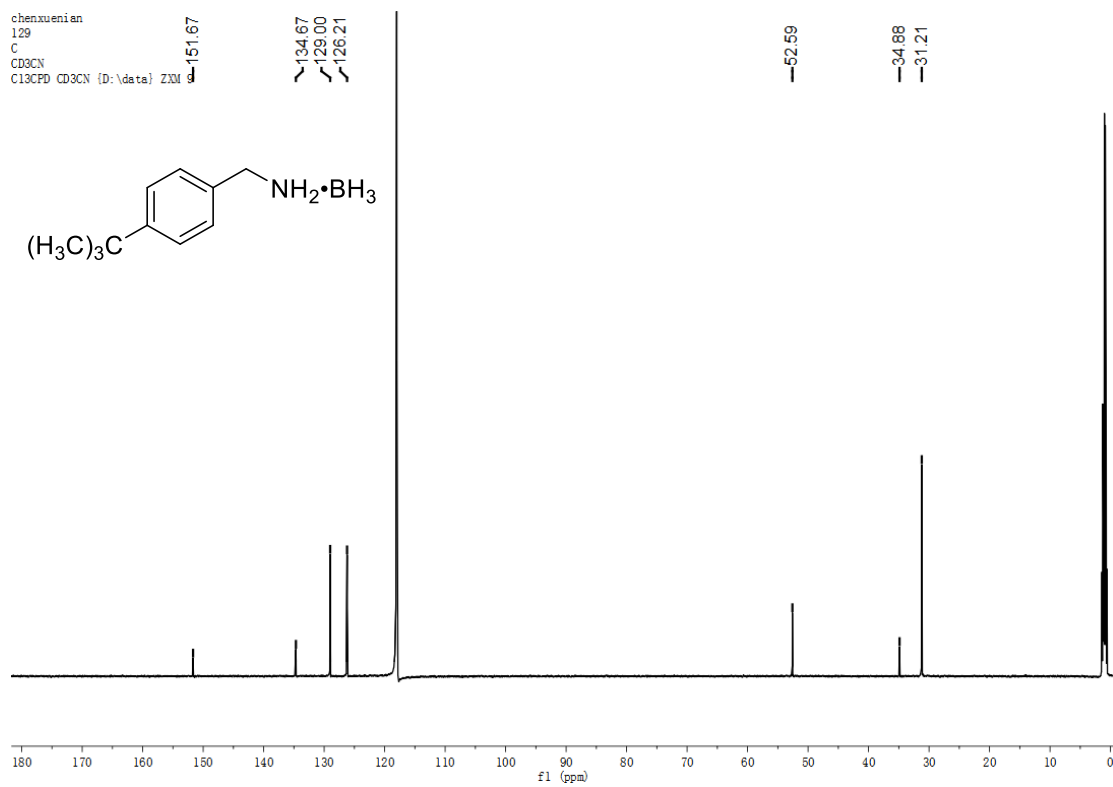

**Figure S21.**  $^{13}\text{C}$  NMR spectrum of **2c** (600 MHz, DMSO)

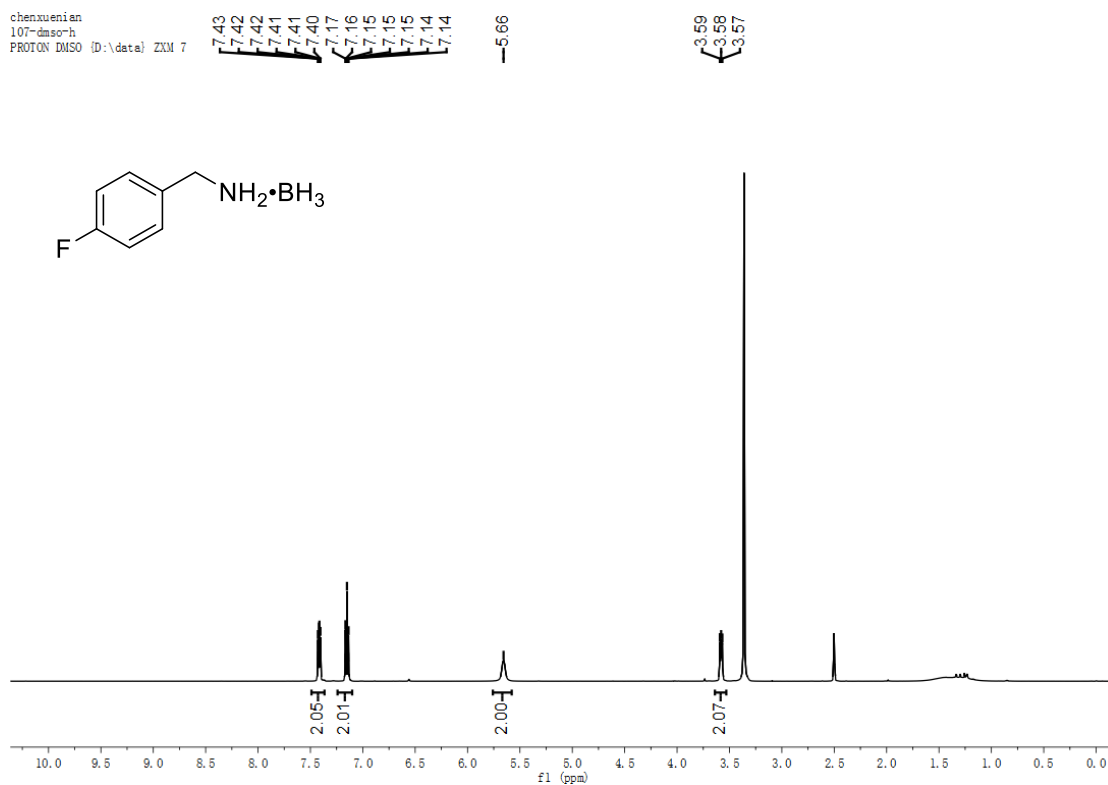

**Figure S22.**  $^1\text{H}$  NMR spectrum of **2d** (600 MHz, DMSO)

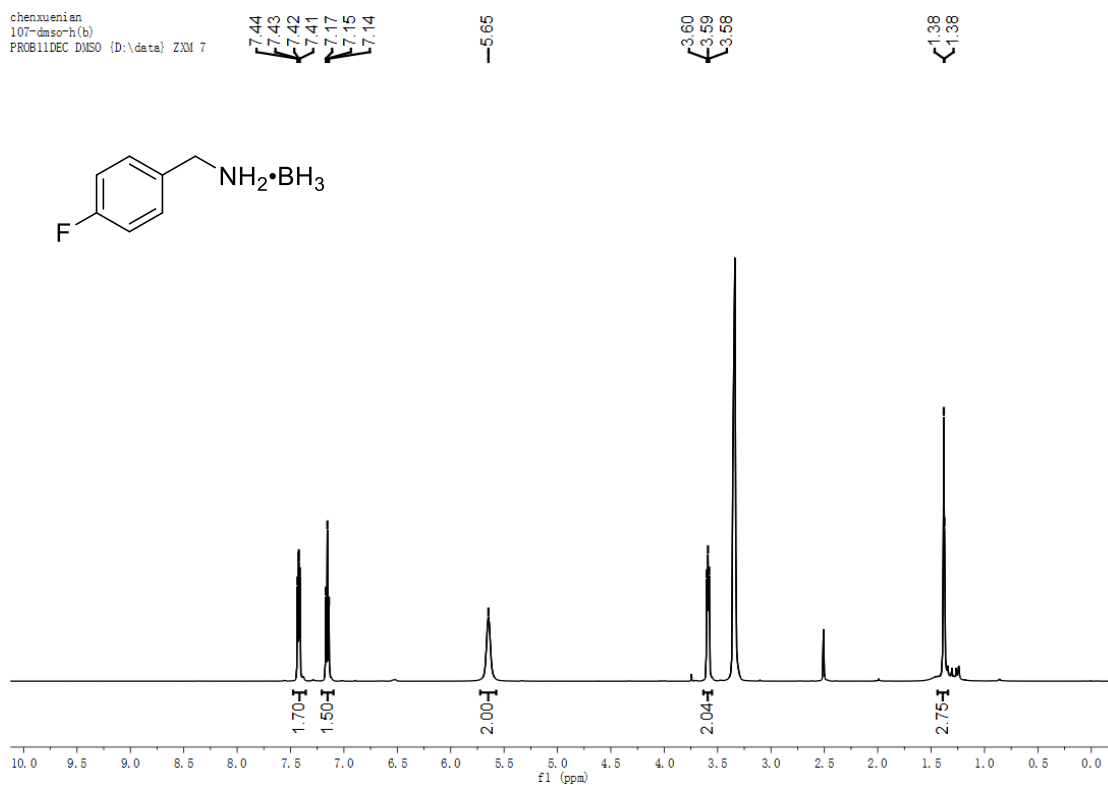

**Figure S23.**  $^1\text{H}\{\text{B}\}$  NMR spectrum of **2d** (400 MHz, DMSO)

2021-10  
173hae  
B DMSO

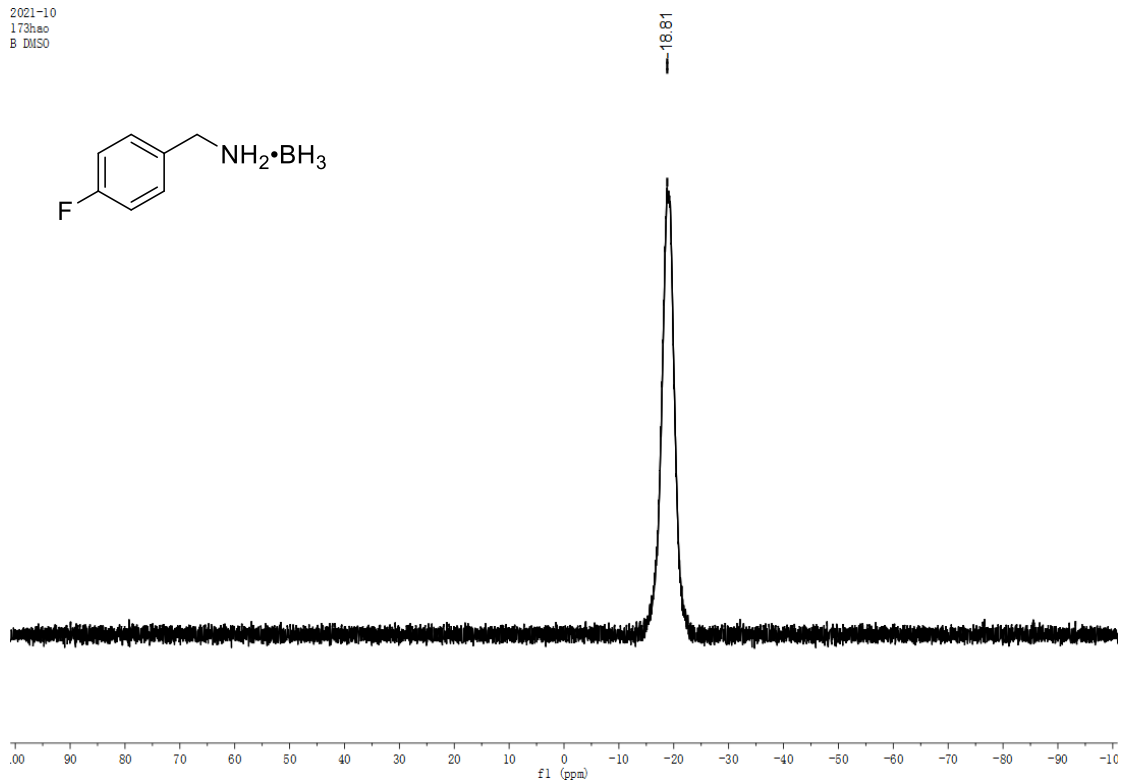

Figure S24.  $^{11}\text{B}$  NMR spectrum of 2d (400 MHz, DMSO)

2021-10  
173hae  
B (H) DMSO

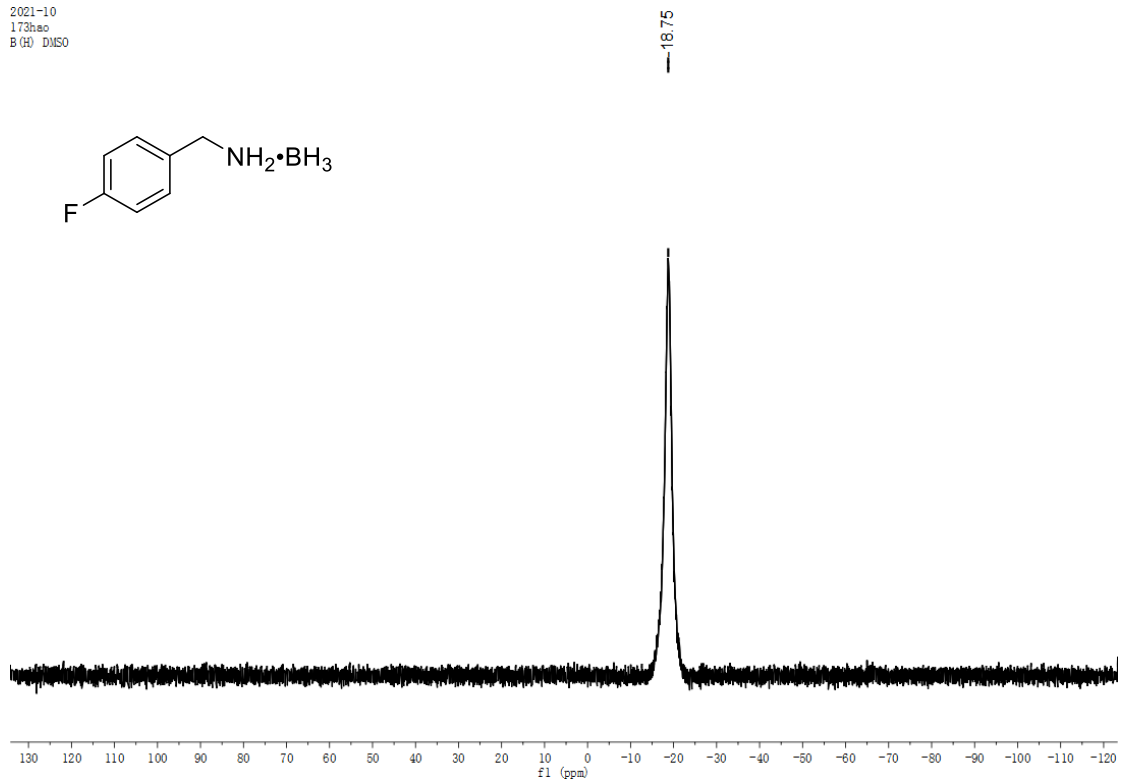

Figure S25.  $^{11}\text{B}\{^1\text{H}\}$  NMR spectrum of 2d (400 MHz, DMSO)

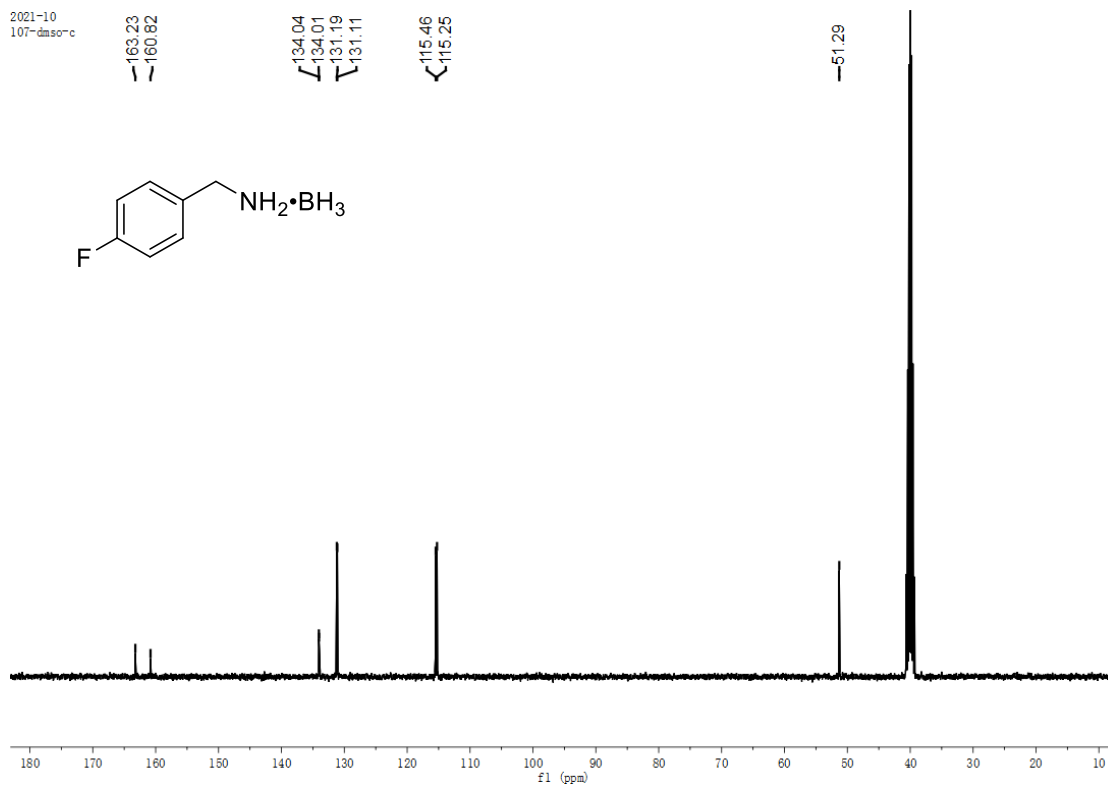

**Figure S26.**  $^{13}\text{C}$  NMR spectrum of **2d** (400 MHz, DMSO)

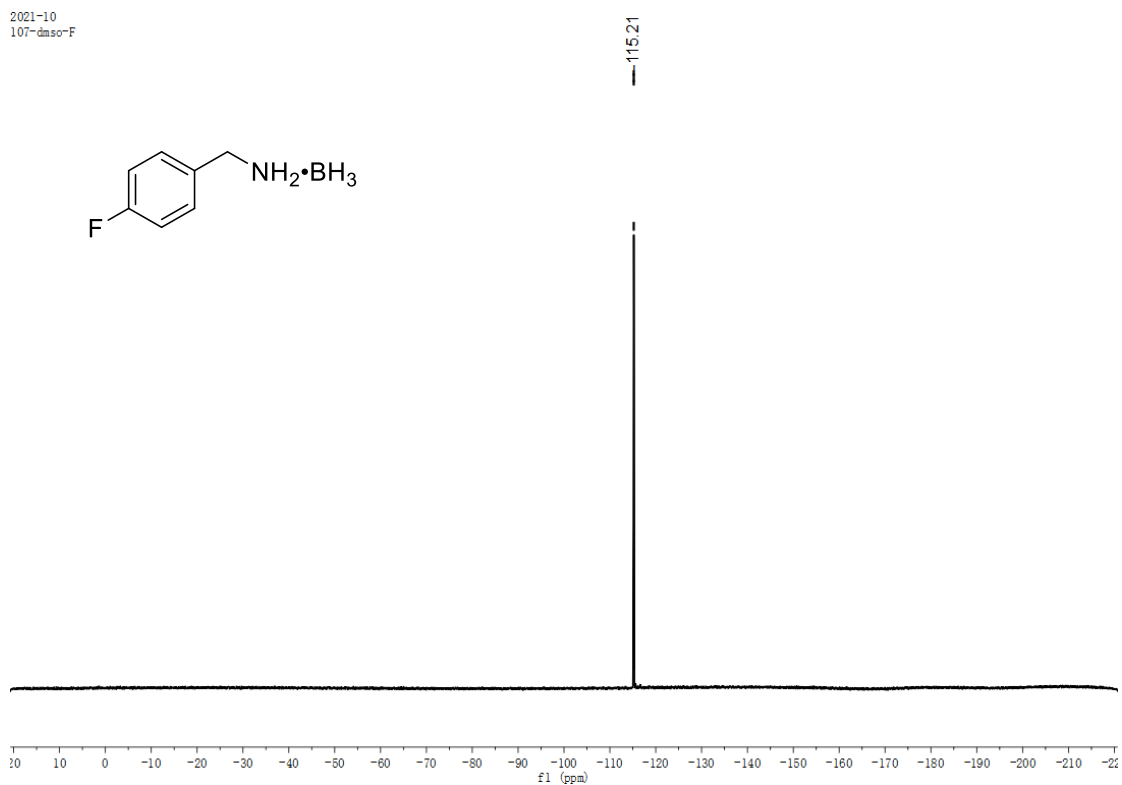

**Figure S27.**  $^{19}\text{F}$  NMR spectrum of **2d** (400 MHz, DMSO)

106-H

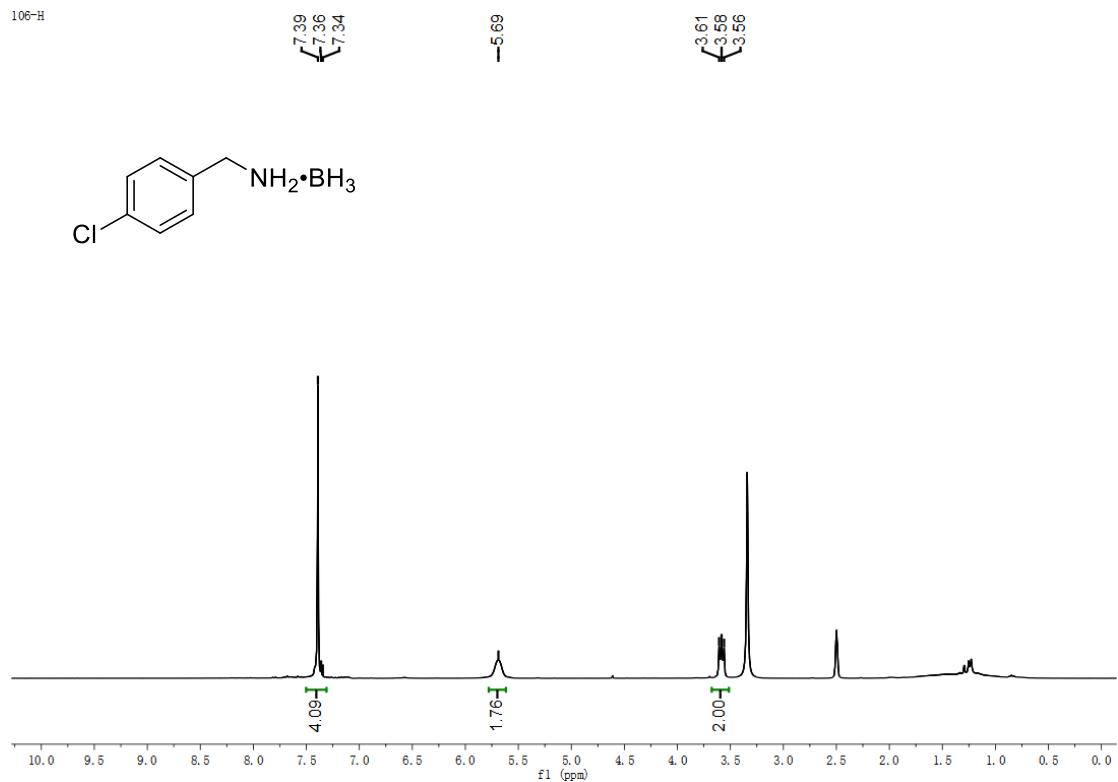

Figure S28. <sup>1</sup>H NMR spectrum of 2e (300 MHz, DMSO)

106-H(B)

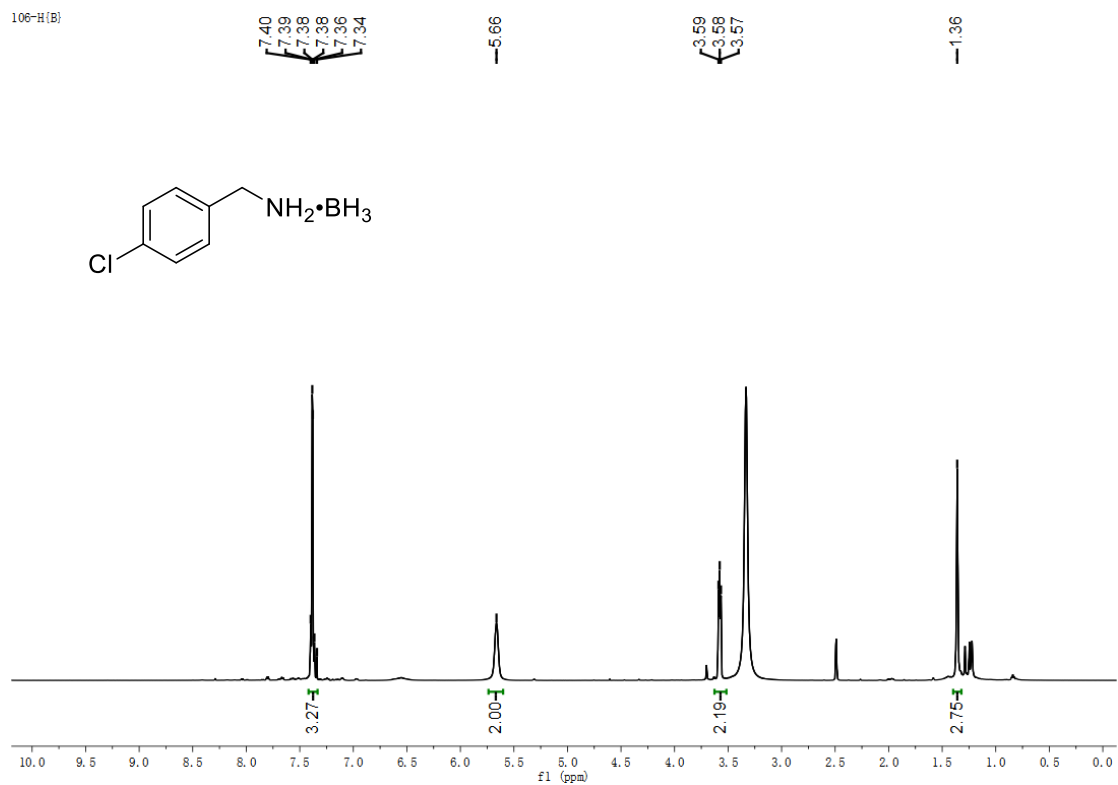

Figure S29. <sup>1</sup>H{B} NMR spectrum of 2e (600 MHz, DMSO)



106-B

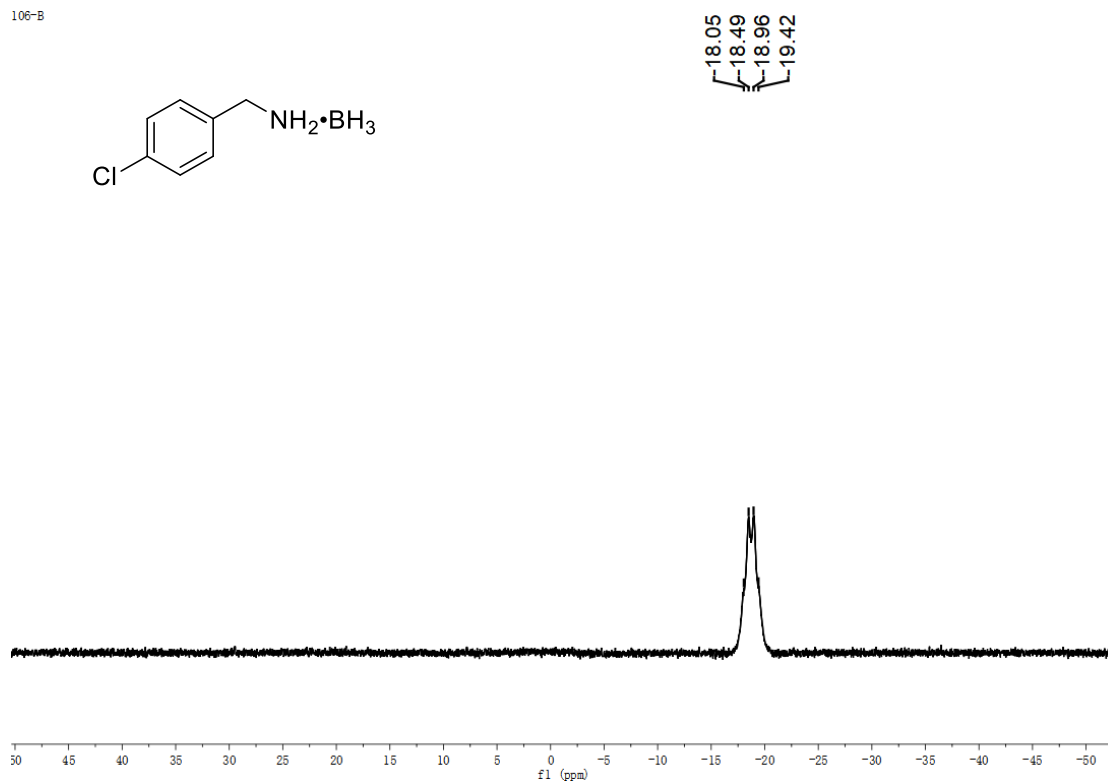

Figure S30. <sup>11</sup>B NMR spectrum of 2e (600 MHz, DMSO)

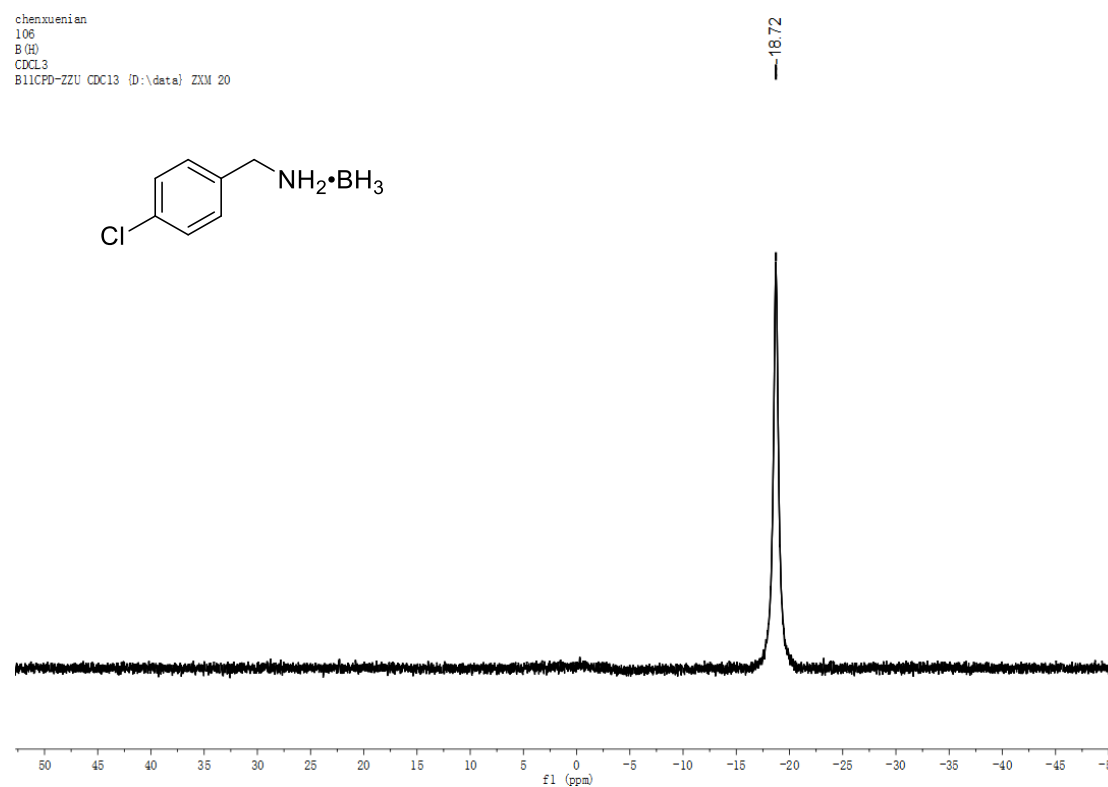

Figure S31. <sup>11</sup>B{<sup>1</sup>H} NMR spectrum of 2e (600 MHz, DMSO)

106-C

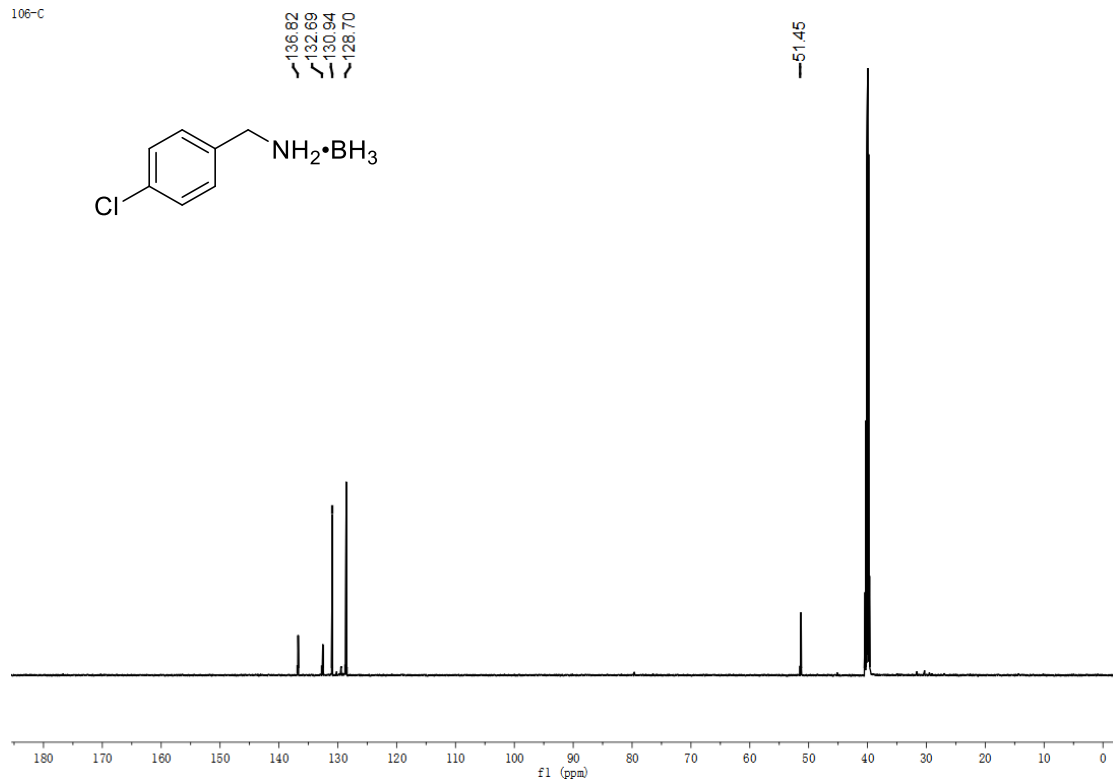

**Figure S32.** <sup>13</sup>C NMR spectrum of **2e** (600 MHz, DMSO)

116  
116-H  
H  
7.8

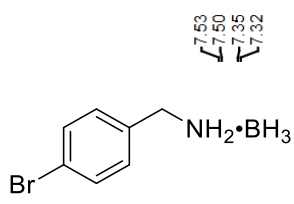

7.53  
7.50  
7.35  
7.32

5.68

3.59  
3.57  
3.54

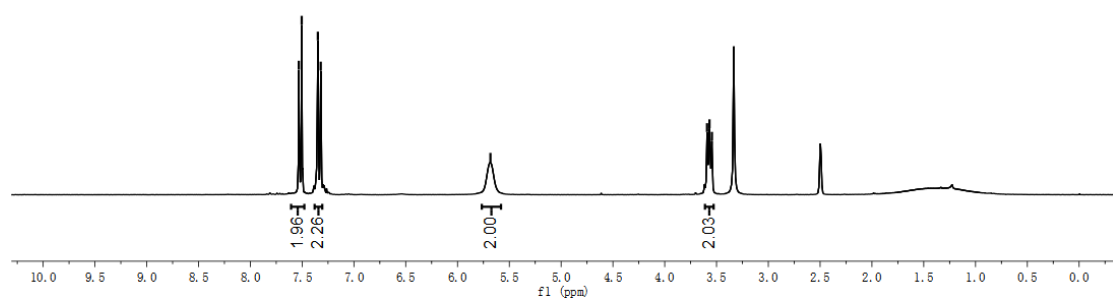

Figure S33.  $^1\text{H}$  NMR spectrum of 2f (300 MHz, DMSO)

20211109-剩余图谱  
116-dms0-h(b)

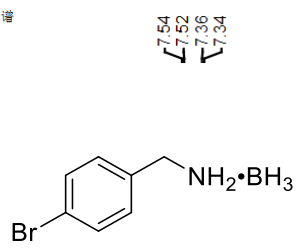

7.54  
7.52  
7.36  
7.34

5.68

3.60  
3.56  
3.56

1.38

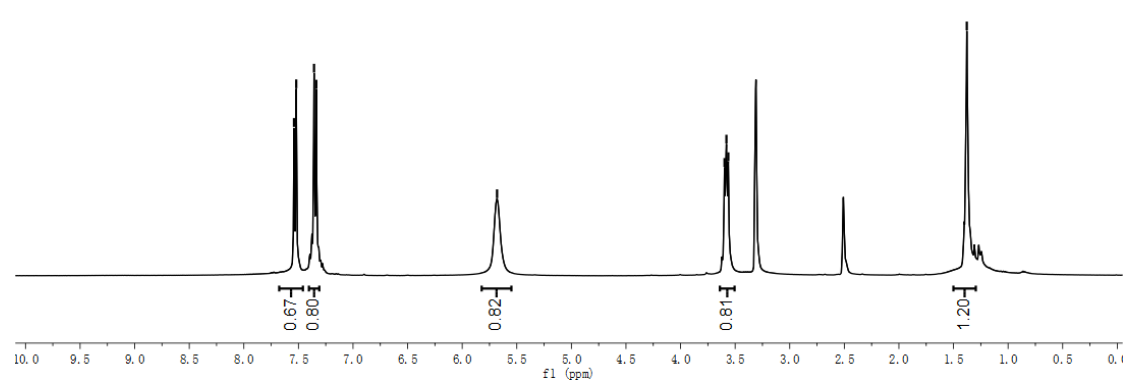

Figure S34.  $^1\text{H}\{\text{B}\}$  NMR spectrum of 2f (400 MHz, DMSO)

20211109-剩余图谱  
116-dmsc-b

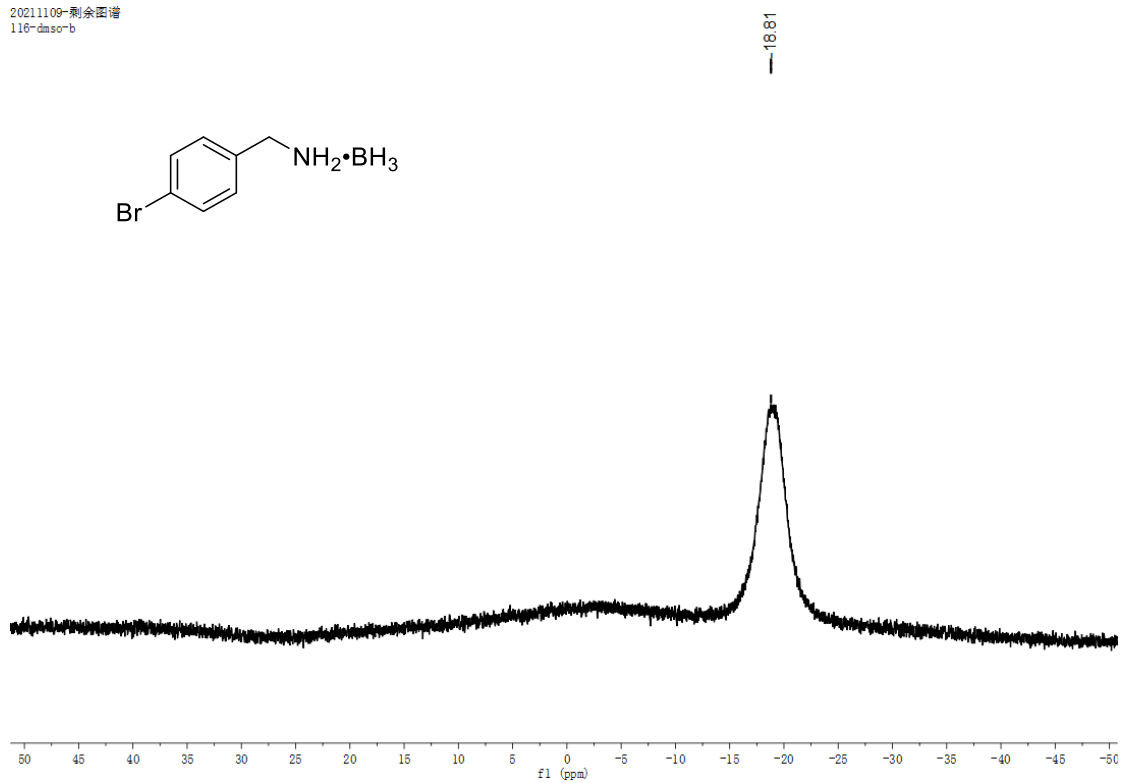

Figure S35.  $^{11}\text{B}$  NMR spectrum of 2f (400 MHz, DMSO)

20211109-剩余图谱  
116-dmsc-b(h)

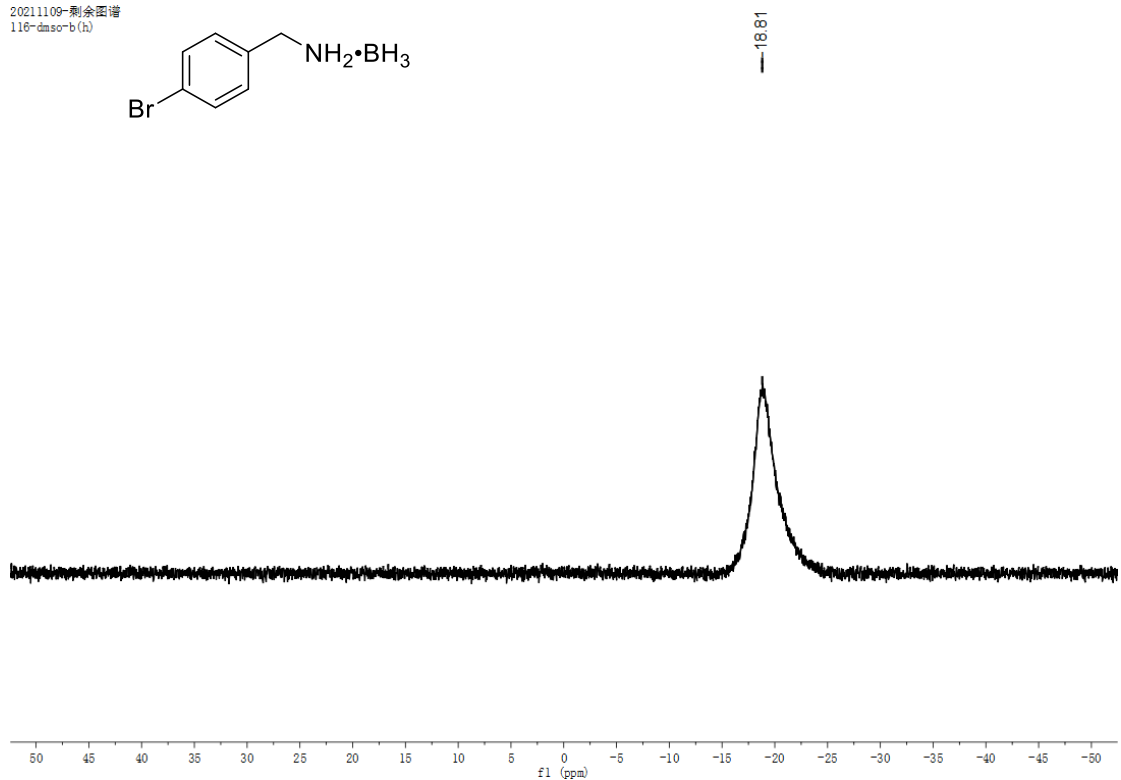

Figure S36.  $^{11}\text{B}$  {H} NMR spectrum of 2f (400 MHz, DMSO)

chenxuenian  
116  
c  
C13CPD DMSO (D:\data) ZXM 2

137.14  
131.50  
131.29  
121.11

51.33

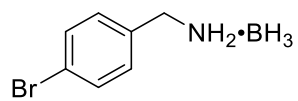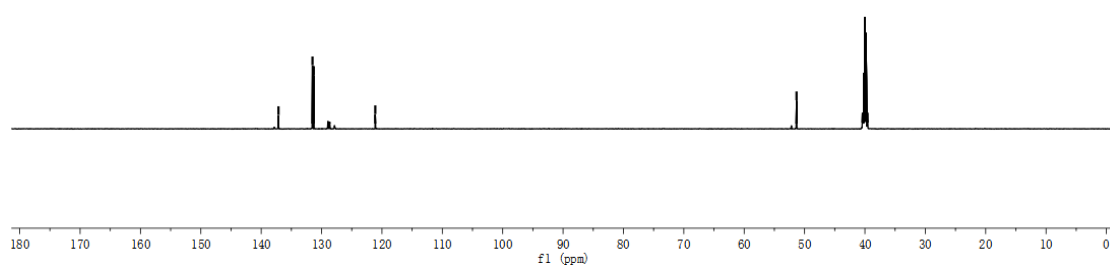

**Figure S37.** <sup>13</sup>C NMR spectrum of **2f** (600 MHz, DMSO)

2021-9  
198-H  
DMSO

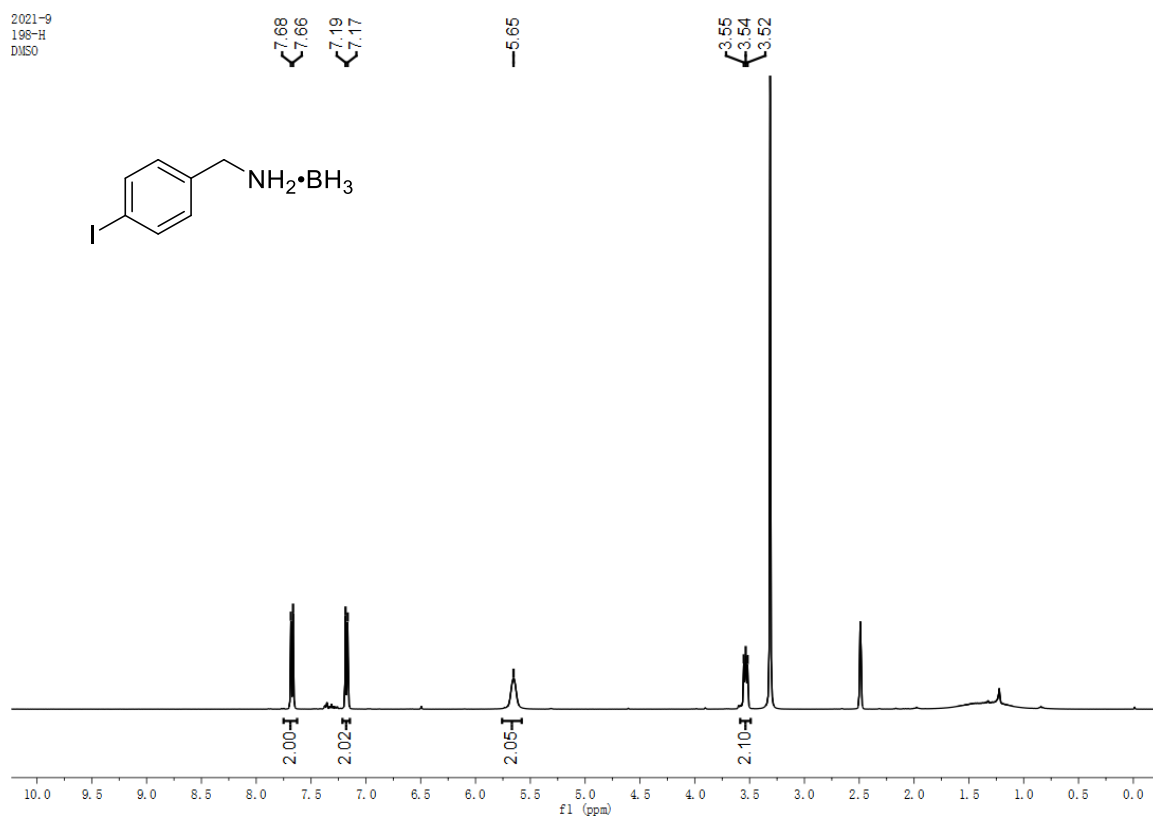

Figure S38. <sup>1</sup>H NMR spectrum of 2g (400 MHz, DMSO)

2021-9  
198-H(B)  
DMSO

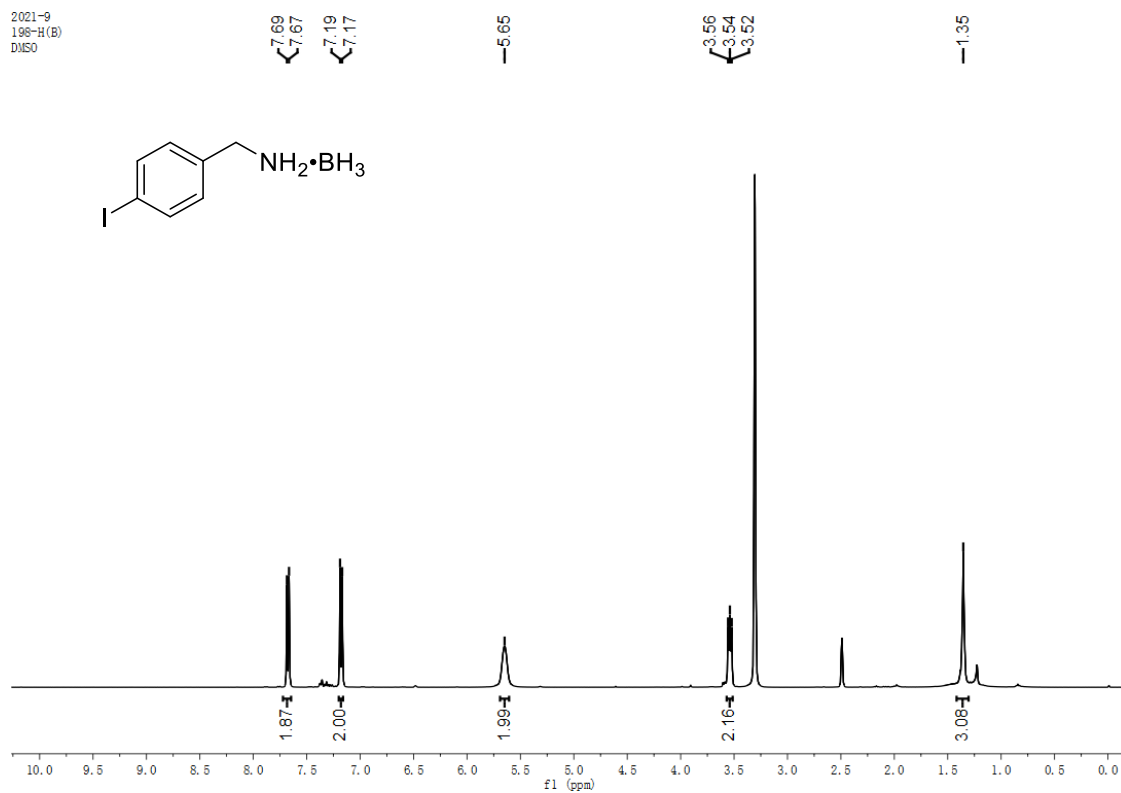

Figure S39. <sup>1</sup>H{B} NMR spectrum of 2g (400 MHz, DMSO)

2021-9  
198-B  
DMSO

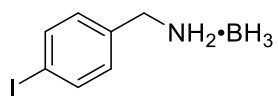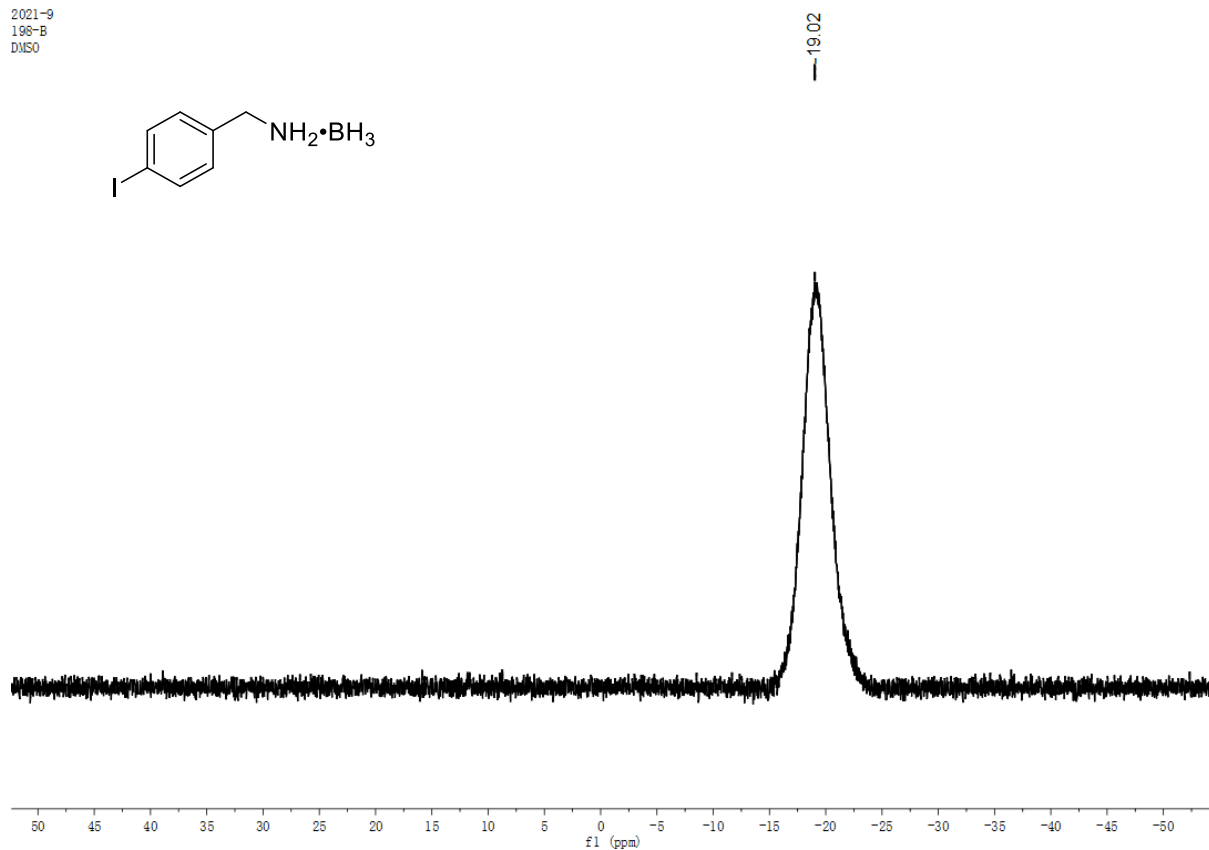

Figure S40.  $^{11}\text{B}$  NMR spectrum of 2g (400 MHz, DMSO)

2021-9  
198-B (H)  
DMSO

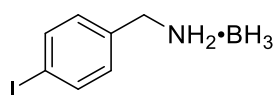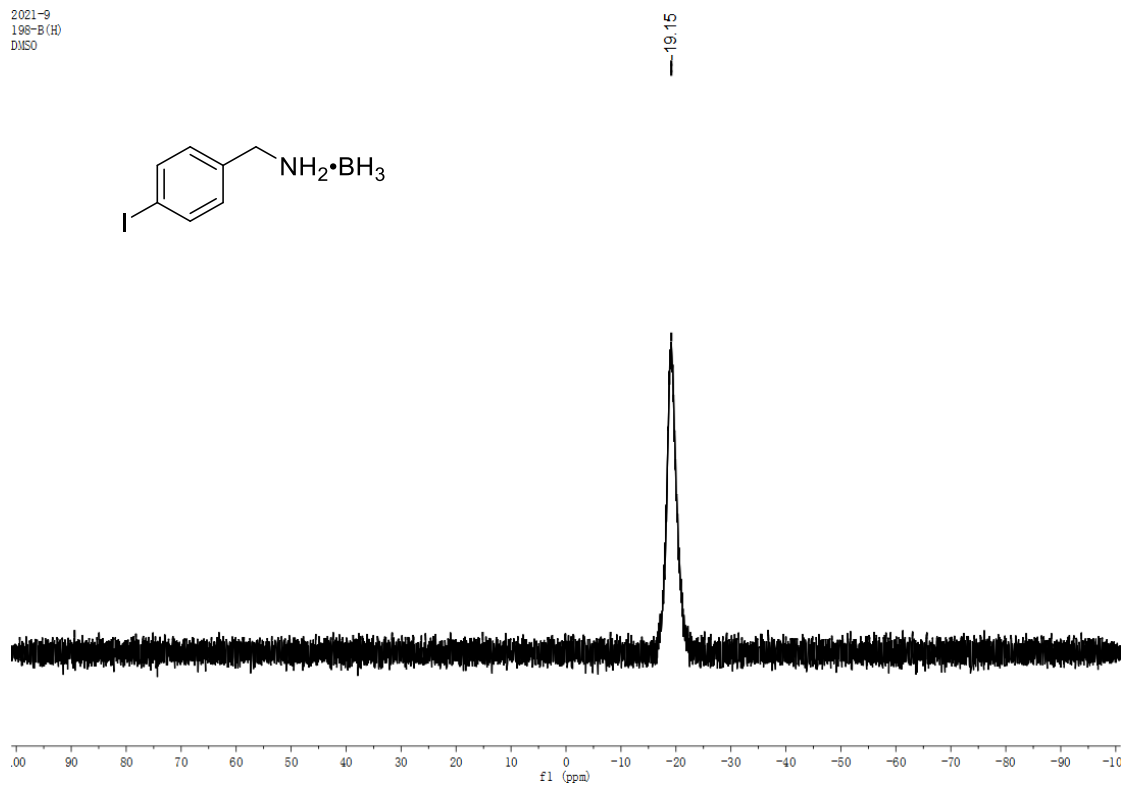

Figure S41.  $^{11}\text{B}\{^1\text{H}\}$  NMR spectrum of 2g (400 MHz, DMSO)

2021-9  
198-C  
DMSO

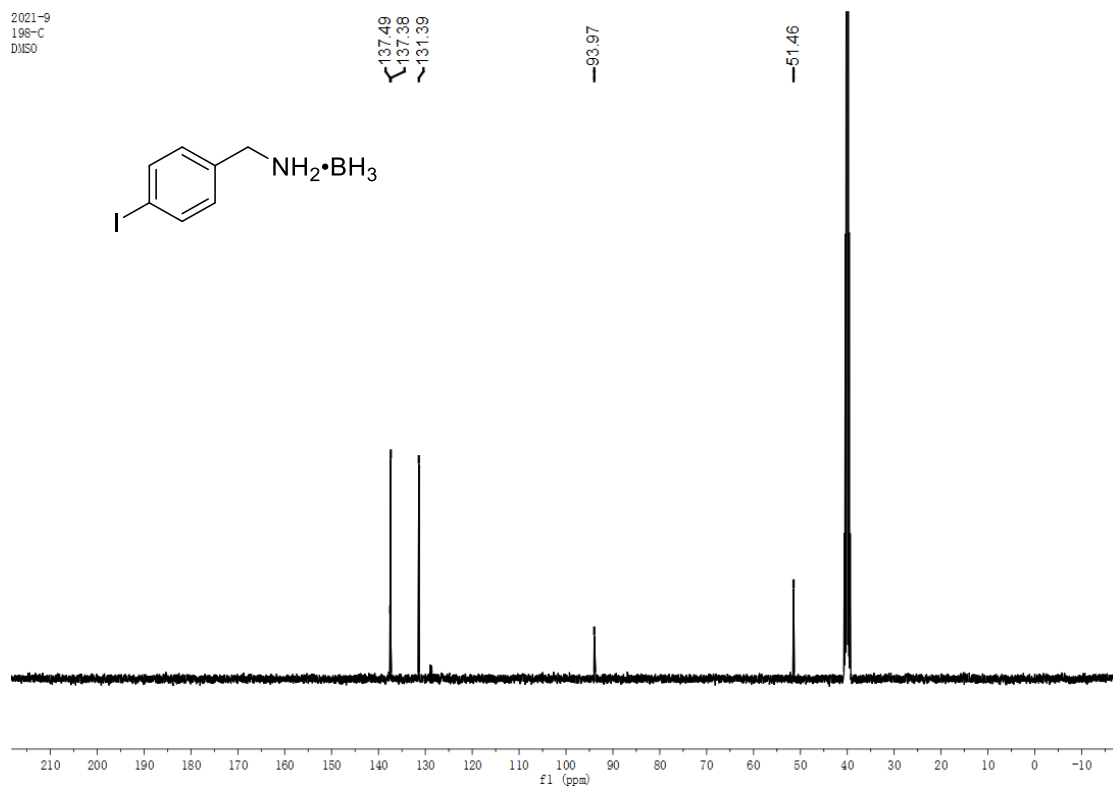

**Figure S42.** <sup>13</sup>C NMR spectrum of **2g** (400 MHz, DMSO)



118  
118  
H

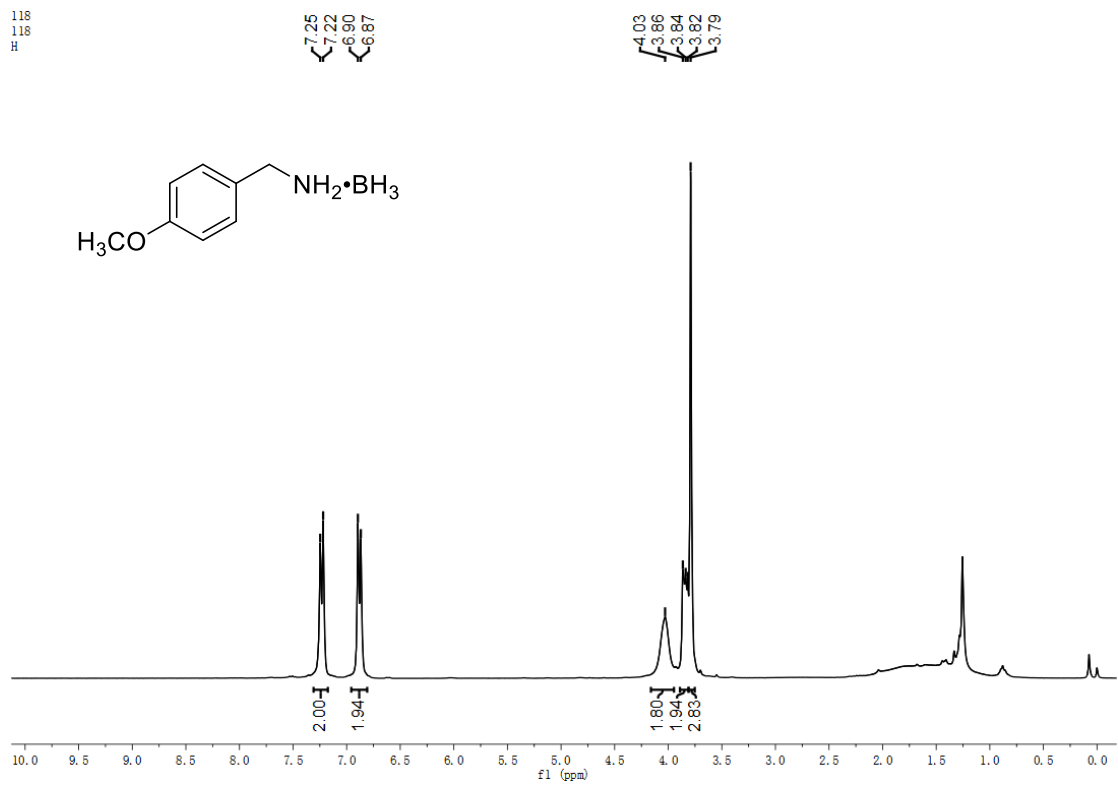

Figure S43. <sup>1</sup>H NMR spectrum of 2h (300 MHz, CDCl<sub>3</sub>)

chenxuenian  
118  
H(B)  
CDCl3  
PROB11DEC CDCl3 (D:\data) ZXM 8

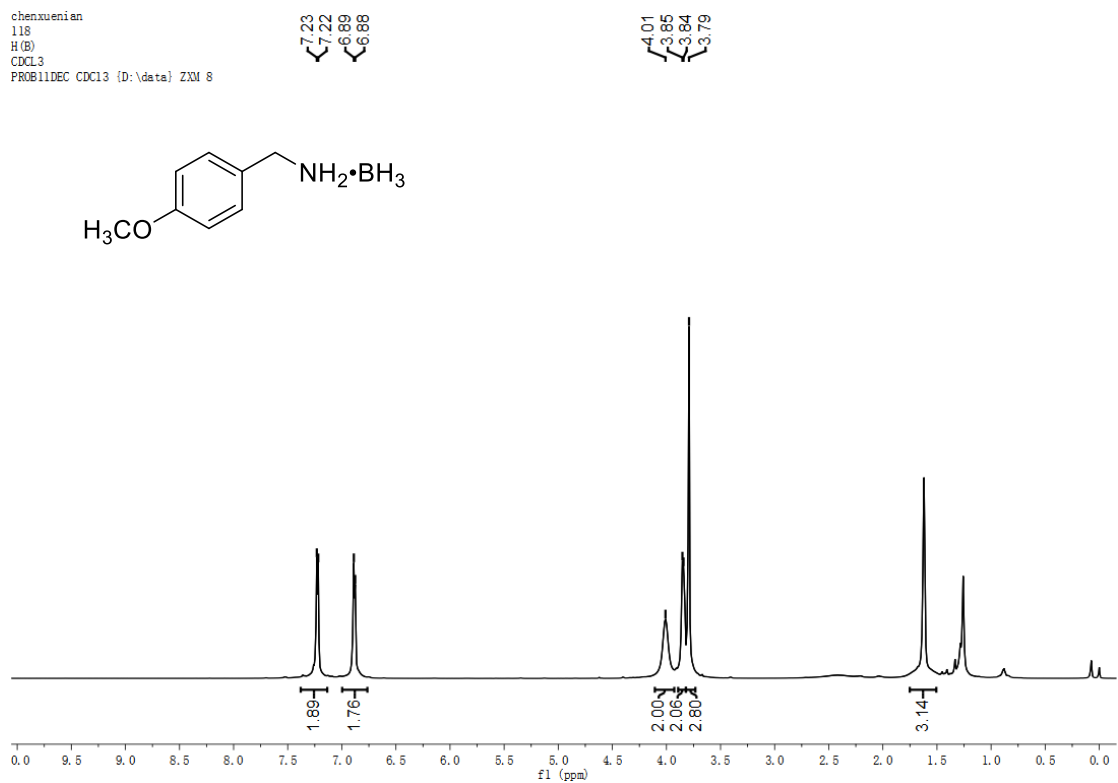

Figure S44. <sup>1</sup>H{B} NMR spectrum of 2h (600 MHz, CDCl<sub>3</sub>)

chenxuenian  
118  
B  
CDCL3  
B11ZG-ZZU CDCL3 (D:\data) ZXM 8

18.23  
18.69  
19.12  
19.67

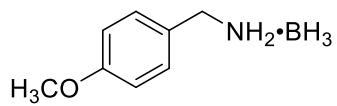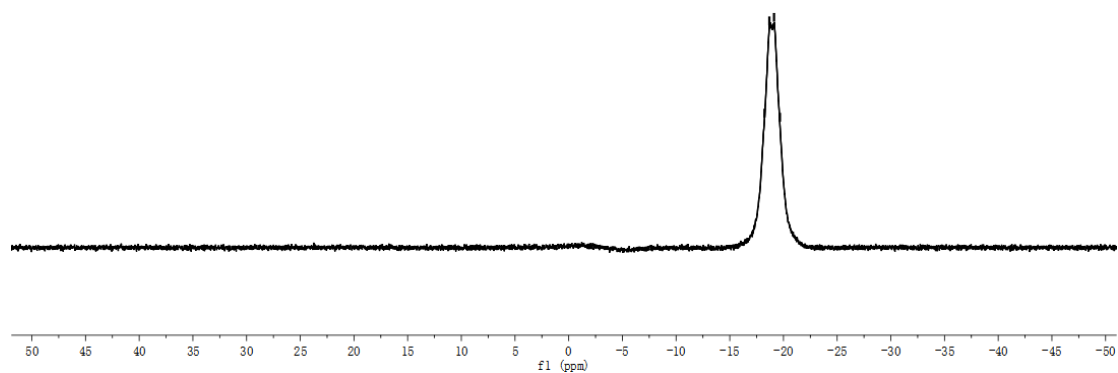

**Figure S45.**  $^{11}\text{B}$  NMR spectrum of **2h** (600 MHz,  $\text{CDCl}_3$ )

chenxuenian  
118  
B (H)  
CDCL3  
B11CPD-ZZU CDCL3 (D:\data) ZXM 8

18.90

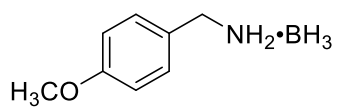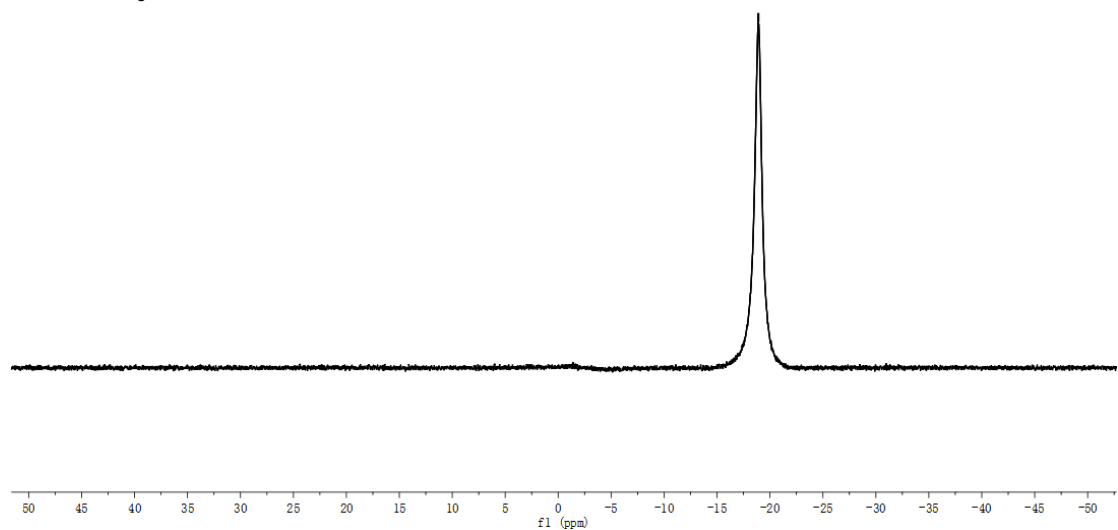

**Figure S46.**  $^{11}\text{B}\{\text{H}\}$  NMR spectrum of **2h** (600 MHz,  $\text{CDCl}_3$ )

chenxuenian  
118  
C  
CDCl3  
C13CPD CDCl3 {D:\data\ ZXM 8

159.89

129.78

128.20

114.57

55.35

52.62

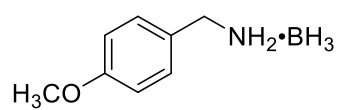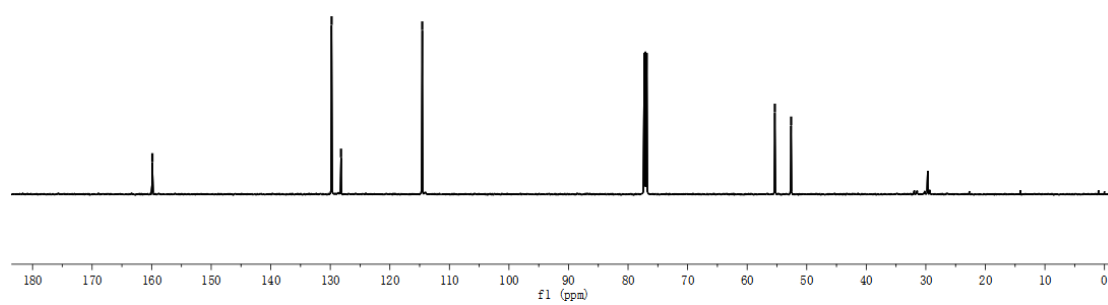

**Figure S47.** <sup>13</sup>C NMR spectrum of **2h** (600 MHz, CDCl<sub>3</sub>)

130  
130  
6.7  
H

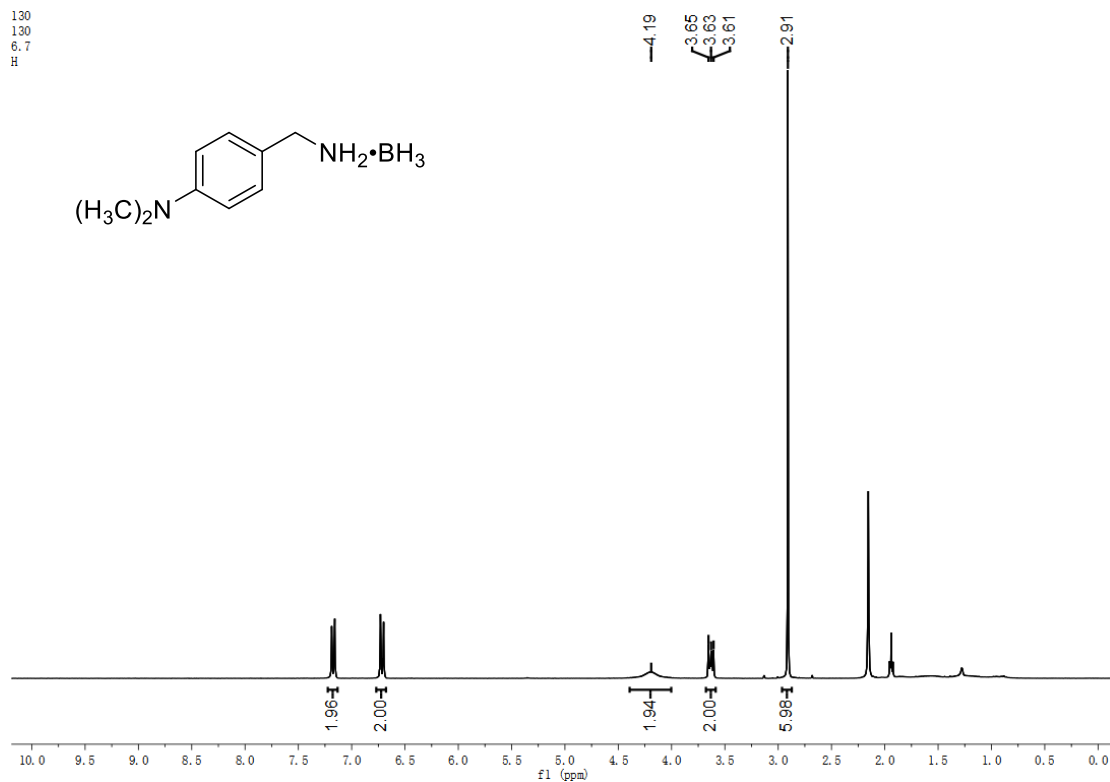

Figure S48. <sup>1</sup>H NMR spectrum of **2i** (300 MHz, CD<sub>3</sub>CN)

chenxuenian  
130  
H(B)  
DMSO  
PROB11DEC DMSO (D:\data) ZXM 14

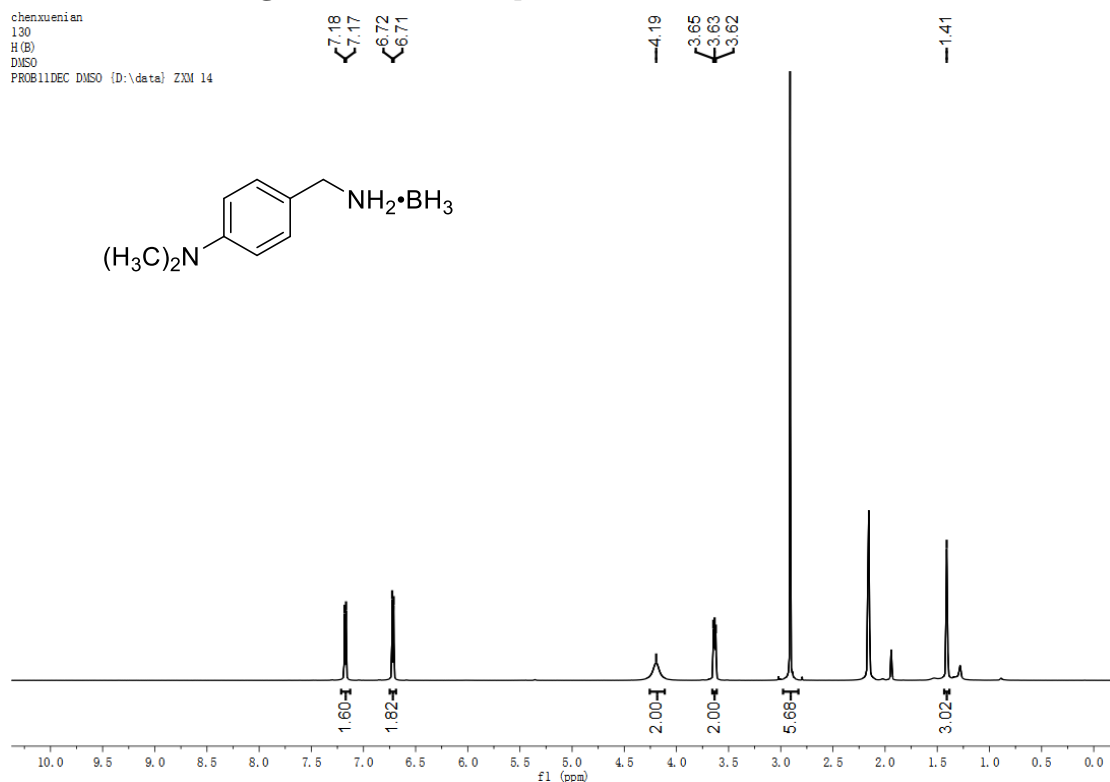

Figure S49. <sup>1</sup>H NMR spectrum of **2i** (600 MHz, CD<sub>3</sub>CN)

chenxuenian  
130  
B  
DMSO  
B112G-ZZU DMSO (D:\data) ZXM 14

18.08  
18.57  
19.06  
19.58

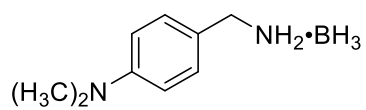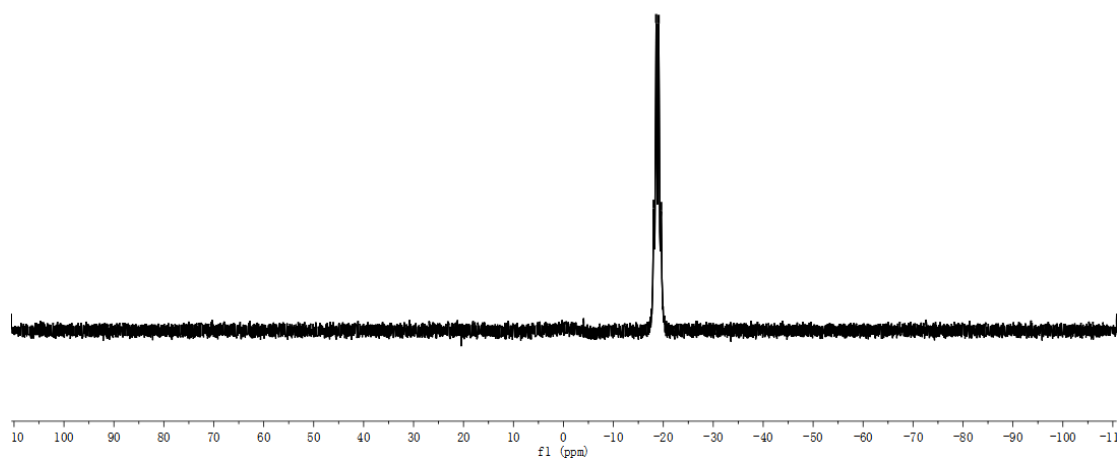

**Figure S50.**  $^{11}\text{B}$  NMR spectrum of **2i** (600 MHz,  $\text{CD}_3\text{CN}$ )

chenxuenian  
130  
B (H)  
DMSO  
B11CPD-ZZU DMSO (D:\data) ZXM 14

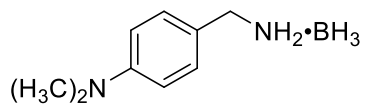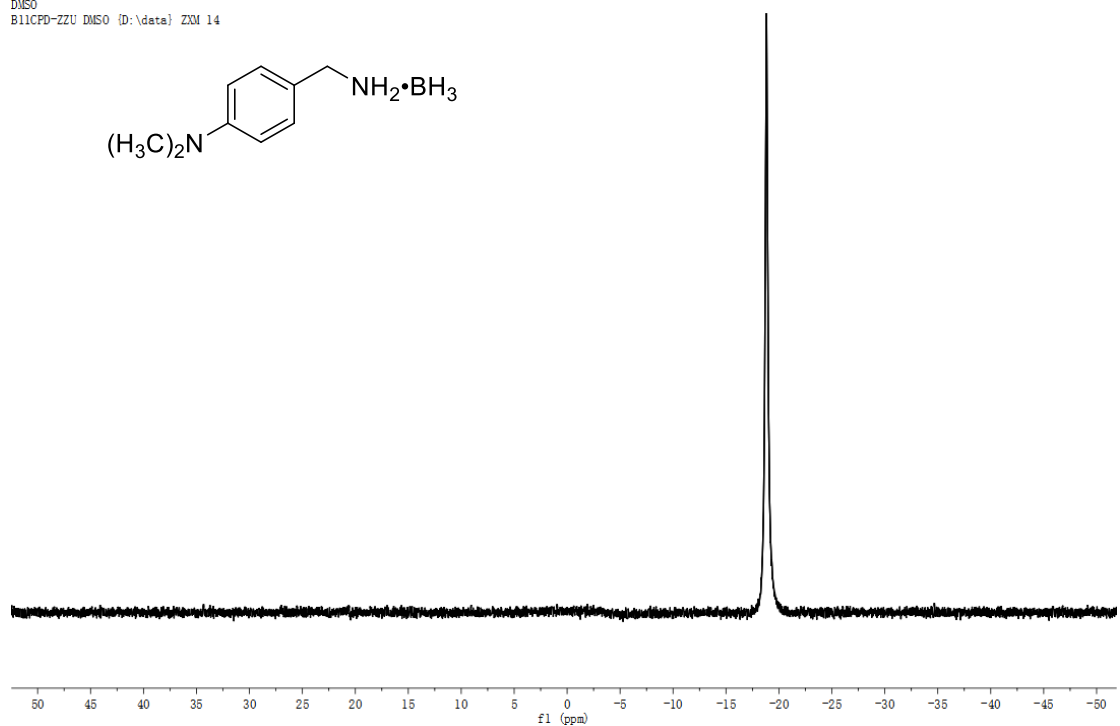

**Figure S51.**  $^{11}\text{B}\{\text{H}\}$  NMR spectrum of **2i** (600 MHz,  $\text{CD}_3\text{CN}$ )

chenxuenian  
130  
C  
DMSO  
C13CPD DMSO [D:\data] ZXM

151.29

130.26

125.04

112.98

52.67

40.37

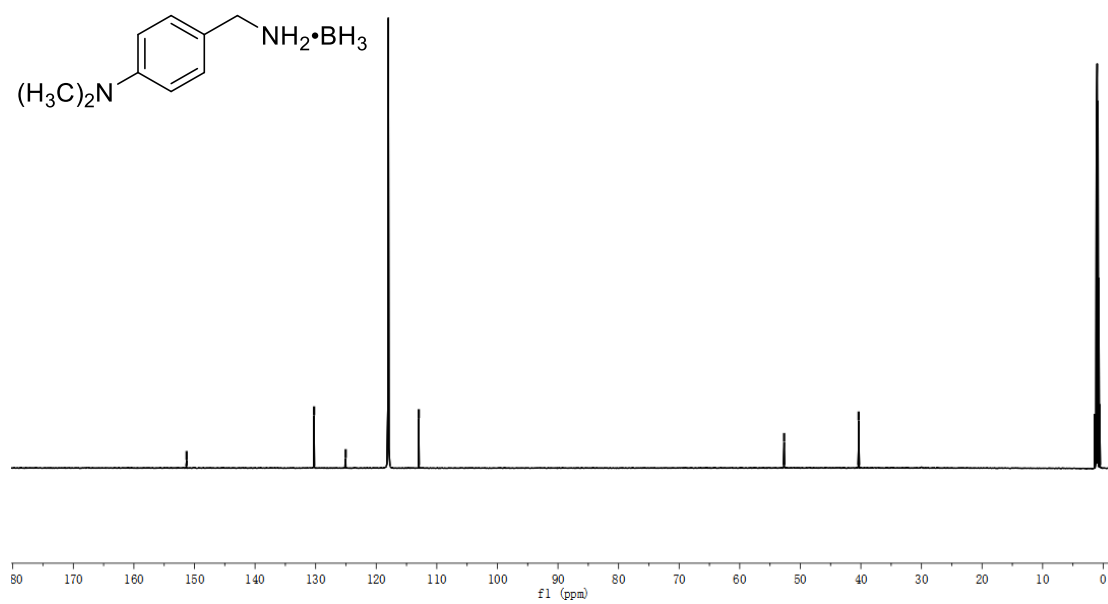

117  
117  
6.15  
H

7.67  
7.64  
7.47  
7.44

4.24  
4.01  
4.00  
3.99  
3.96

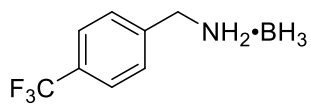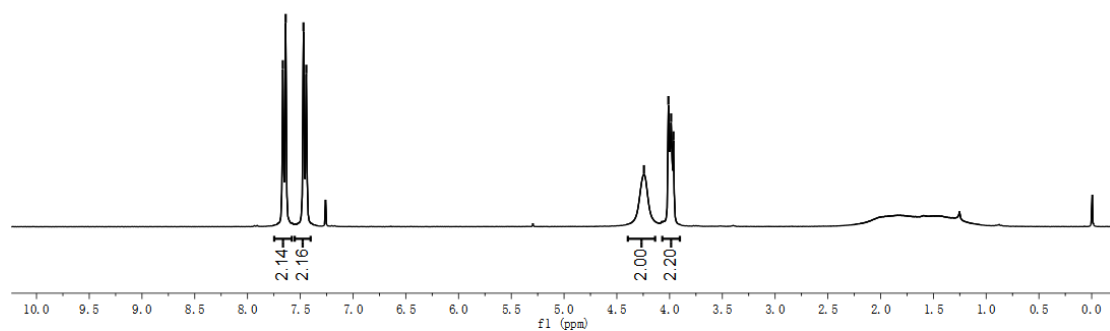

**Figure S53.**  $^1\text{H}$  NMR spectrum of **2j** (300 MHz,  $\text{CDCl}_3$ )

chenxuenian  
117  
H(B)  
CDCL3  
PROB11DEC CDCl3 (D:\data) ZM 7

7.66  
7.65  
7.46  
7.45

4.24  
4.00  
3.99  
3.98

1.64

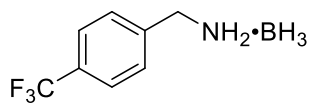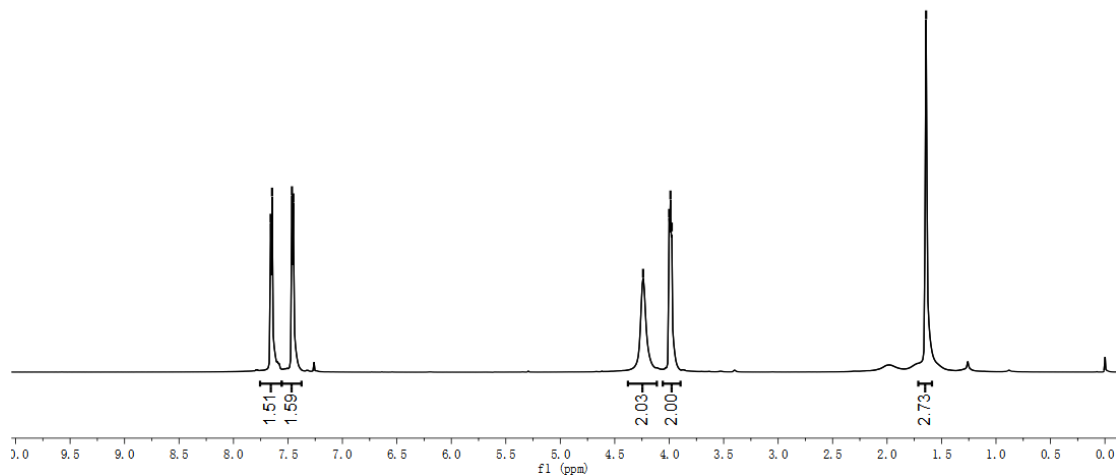

**Figure S54.**  $^1\text{H}\{\text{B}\}$  NMR spectrum of **2j** (600 MHz,  $\text{CDCl}_3$ )

chenxuenian  
117  
B  
CDCL3  
B11ZG-ZZU CDCL3 [D:\data] ZXM 7

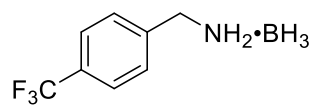

18.43  
18.77

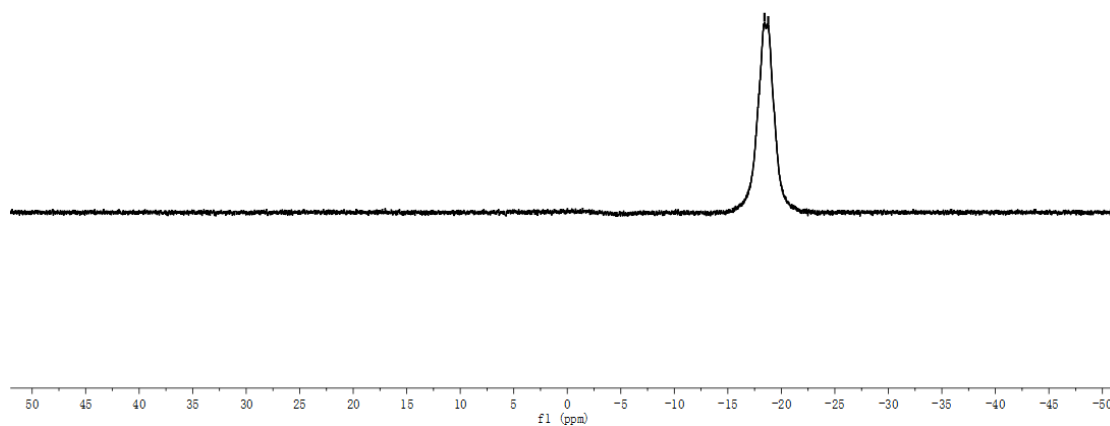

**Figure S55.** <sup>11</sup>B NMR spectrum of **2j** (600 MHz, CDCl<sub>3</sub>)

chenxuenian  
117  
B (H)  
CDCL3  
B11CPD-ZZU CDCL3 [D:\data] ZXM 7

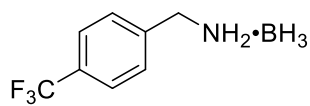

18.55

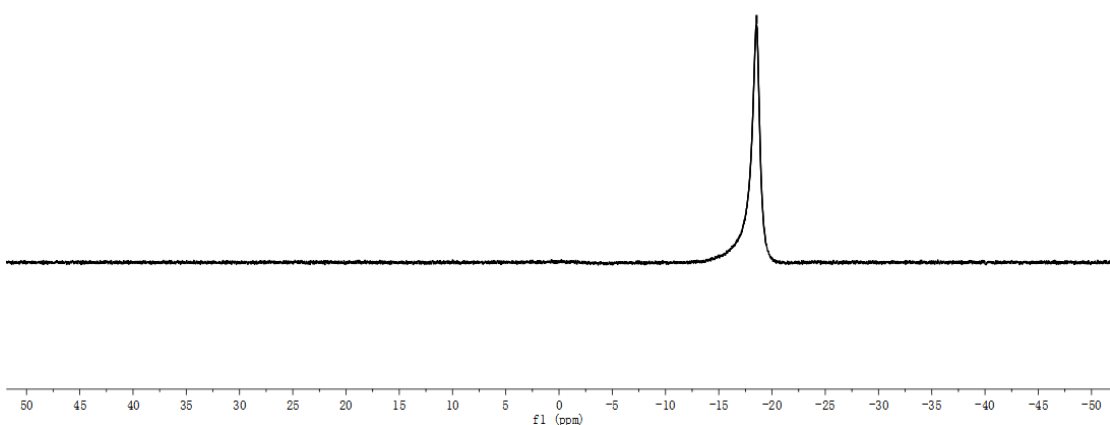

**Figure S56.** <sup>11</sup>B{H} NMR spectrum of **2j** (600 MHz, CDCl<sub>3</sub>)



chenxuenian  
117  
C  
CDCl3  
C13CPD CDCl3 [D:\data] ZM 7

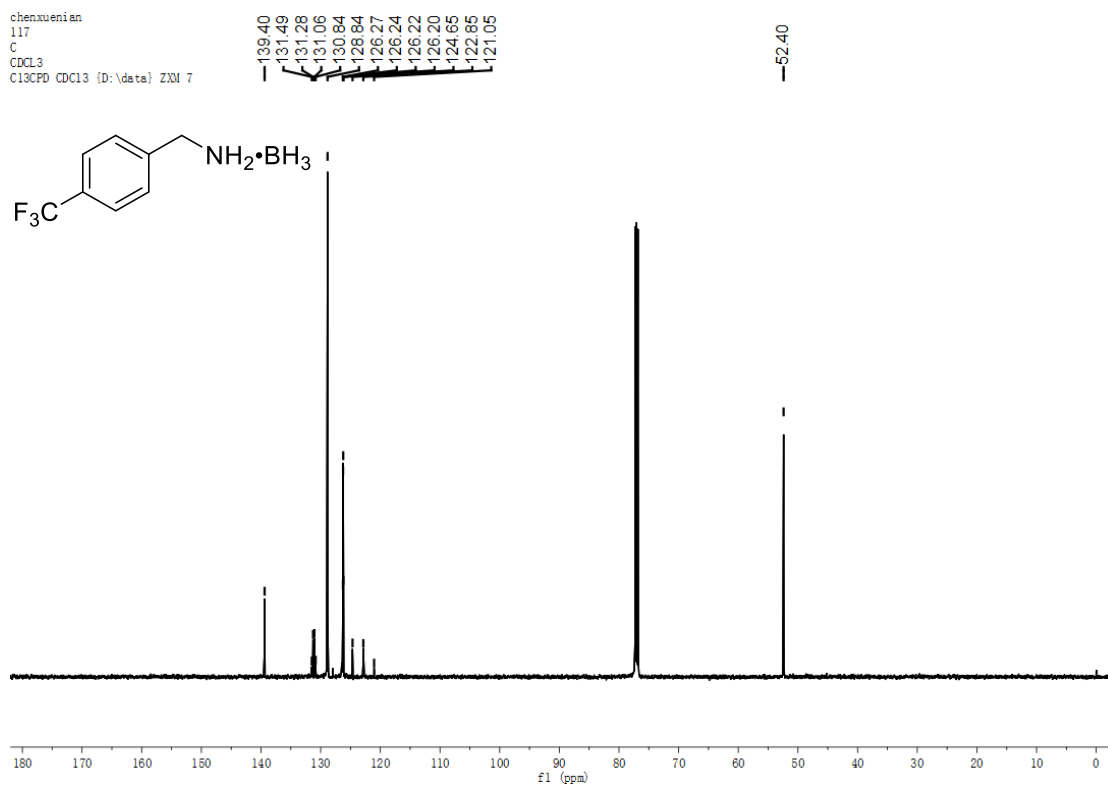

Figure S57.  $^{13}\text{C}$  NMR spectrum of **2j** (600 MHz,  $\text{CDCl}_3$ )

2021-9  
117-DMSO-F

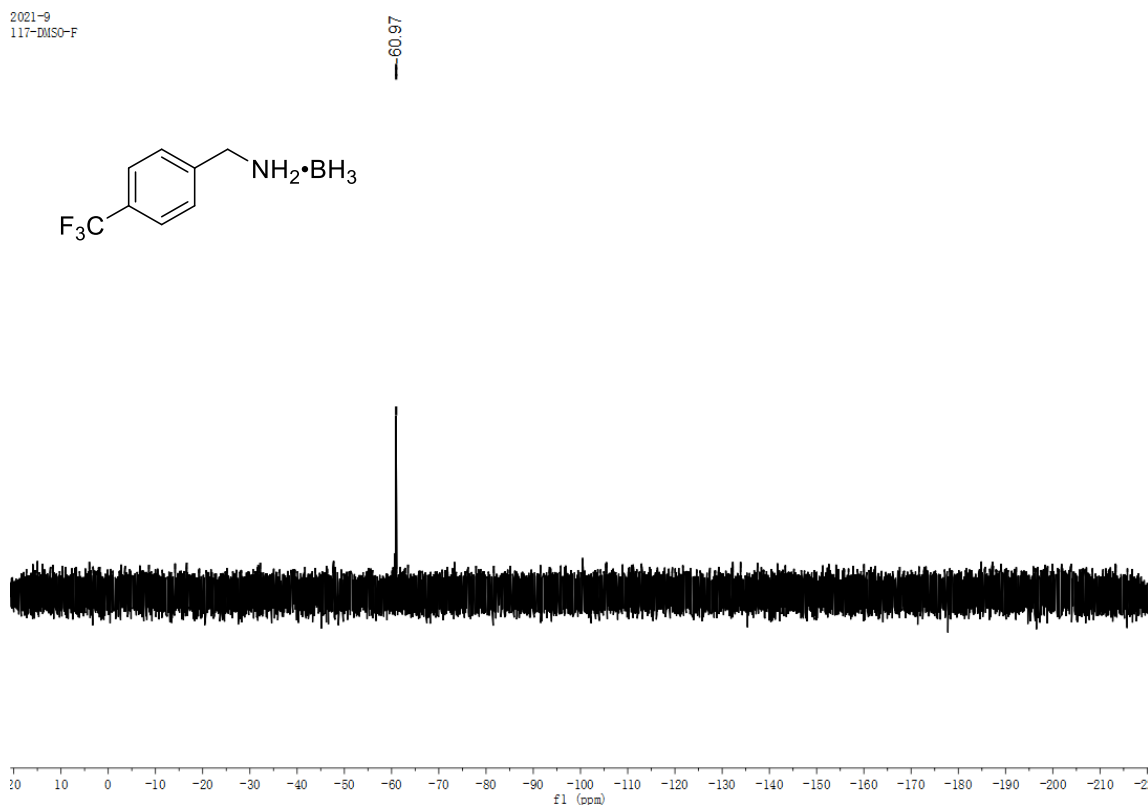

Figure S58.  $^{19}\text{F}\{^1\text{H}\}$  NMR spectrum of **2j** (400 MHz,  $\text{CDCl}_3$ )

2021-10  
163-h-dms0

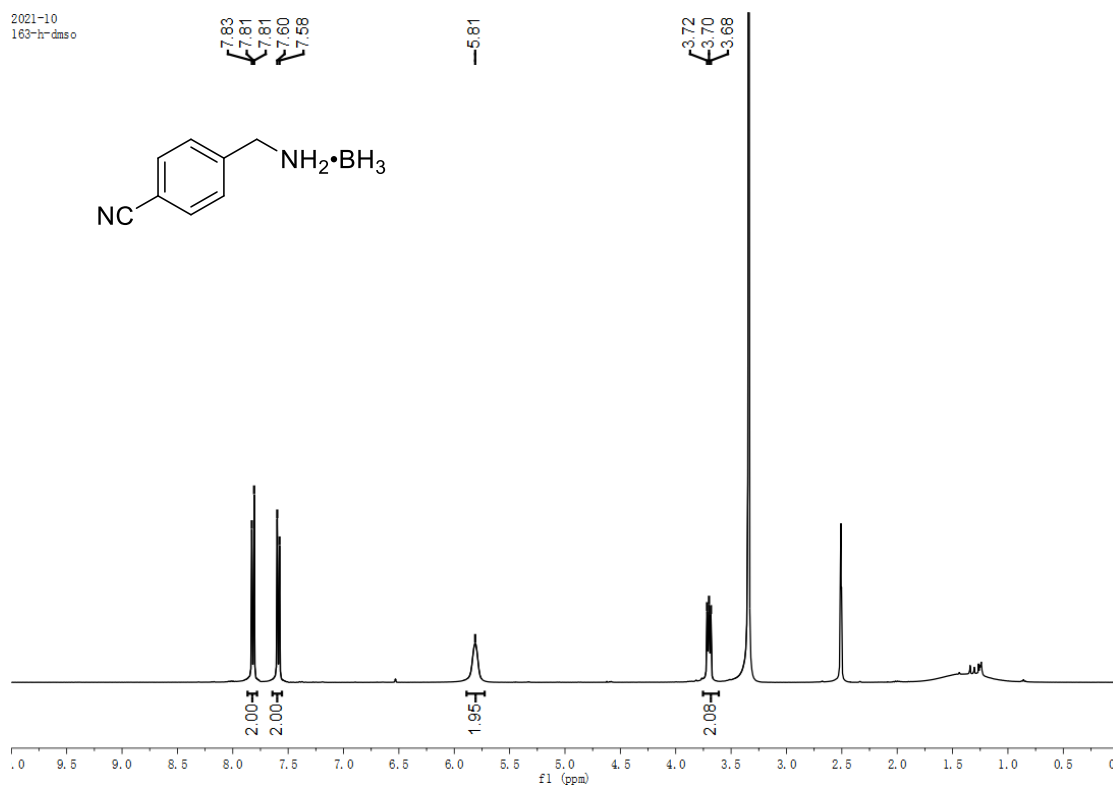

**Figure S59.** <sup>1</sup>H NMR spectrum of **2k** (400 MHz, DMSO)

2021-10  
163-h(b)-dms0

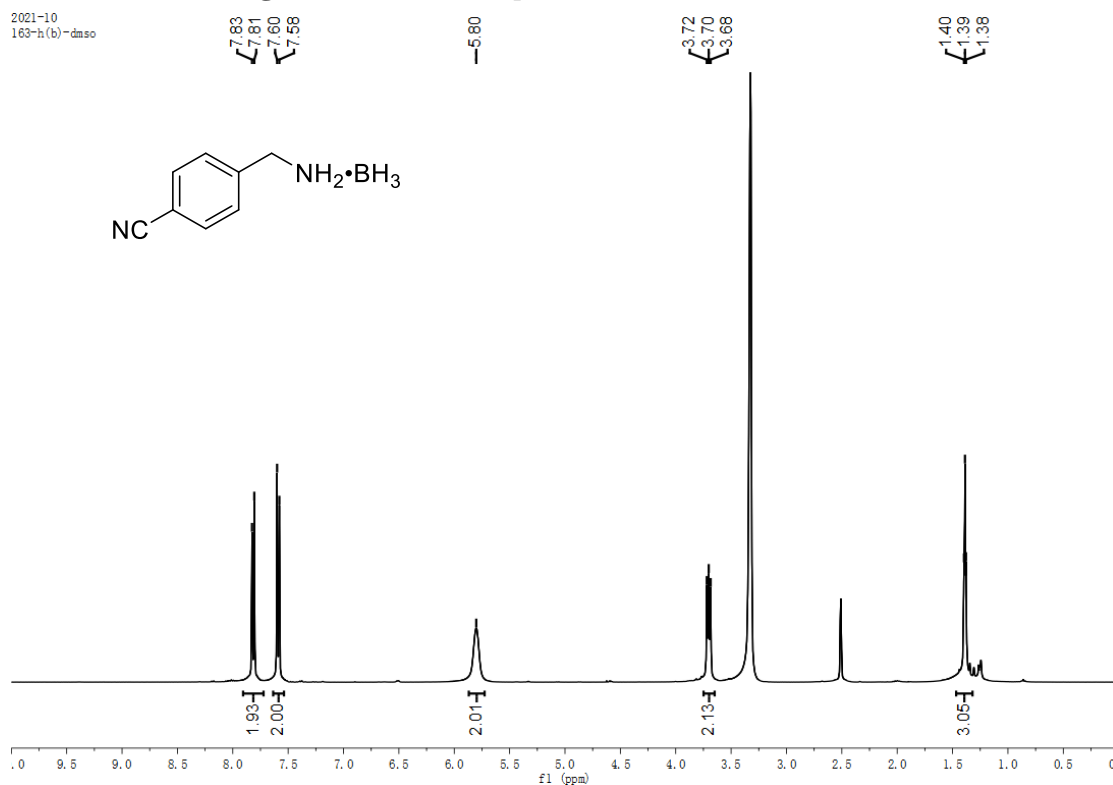

**Figure S60.** <sup>1</sup>H{B} NMR spectrum of **2k** (400 MHz, DMSO)

2021-10  
163-b-dms0

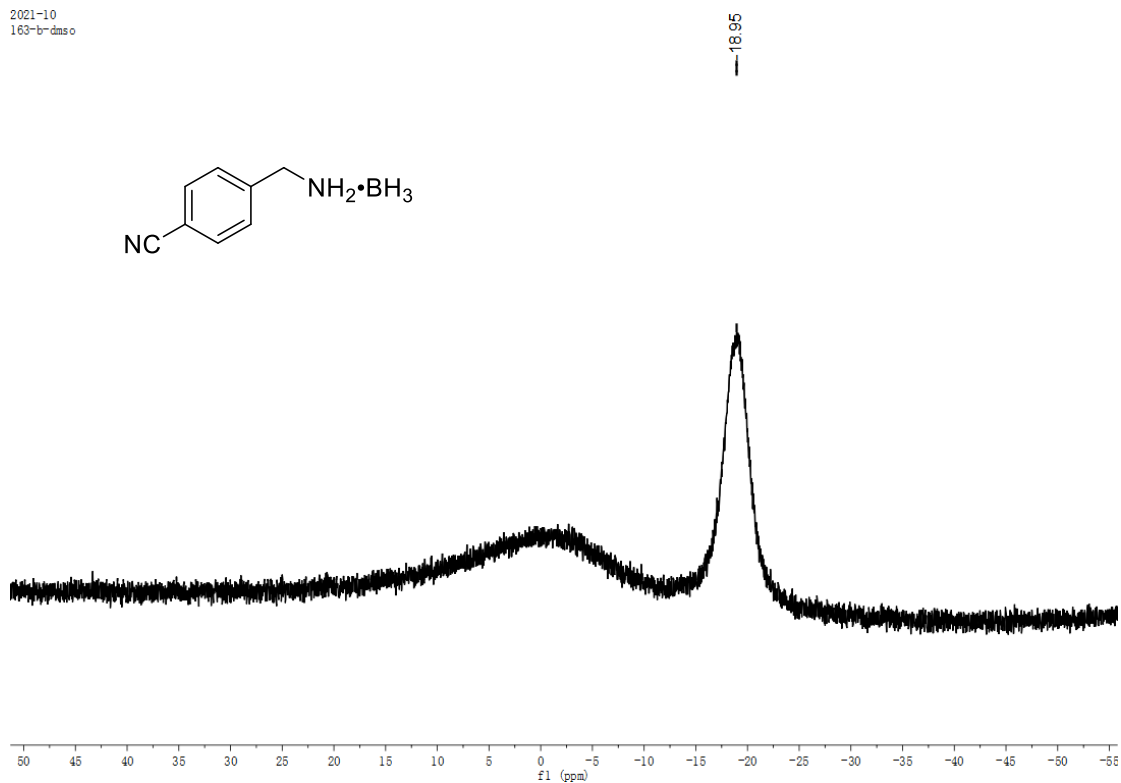

**Figure S61.**  $^{11}\text{B}$  NMR spectrum of **2k** (400 MHz, DMSO)

2021-10  
163-b (h)-dms0

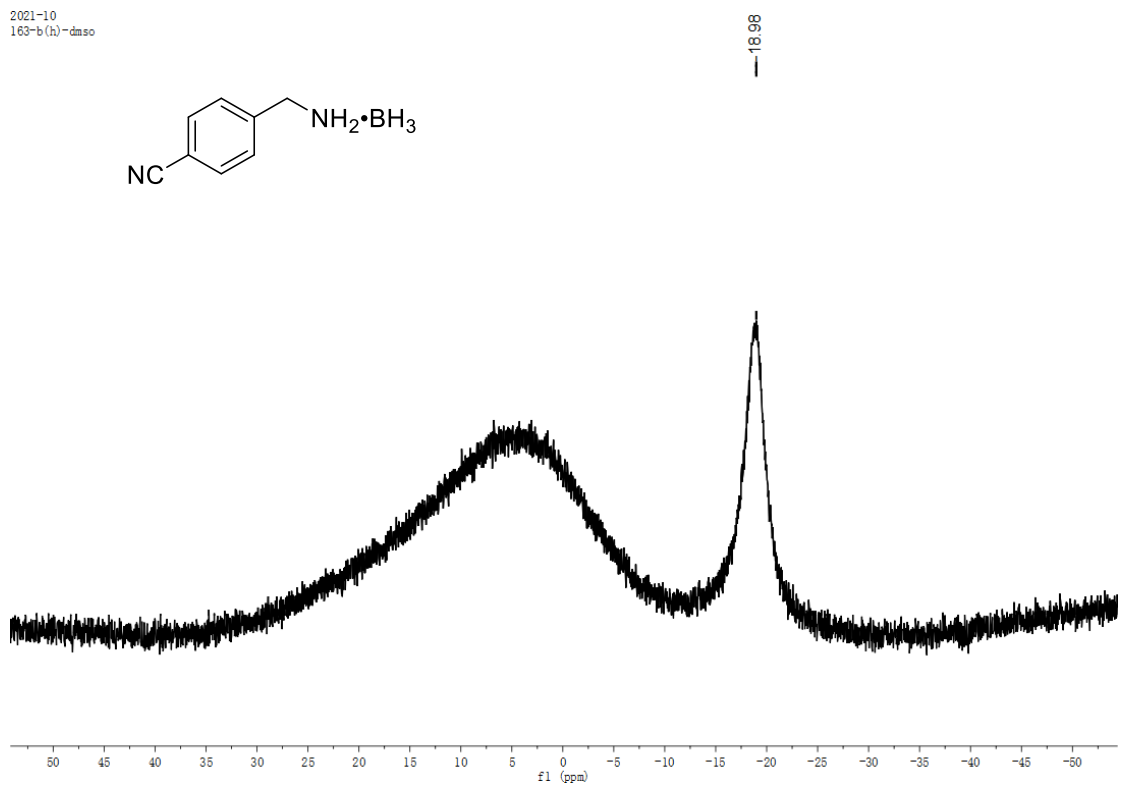

**Figure S62.**  $^{11}\text{B}\{\text{H}\}$  NMR spectrum of **2k** (400 MHz, DMSO)

2021-10  
163-c-dms0

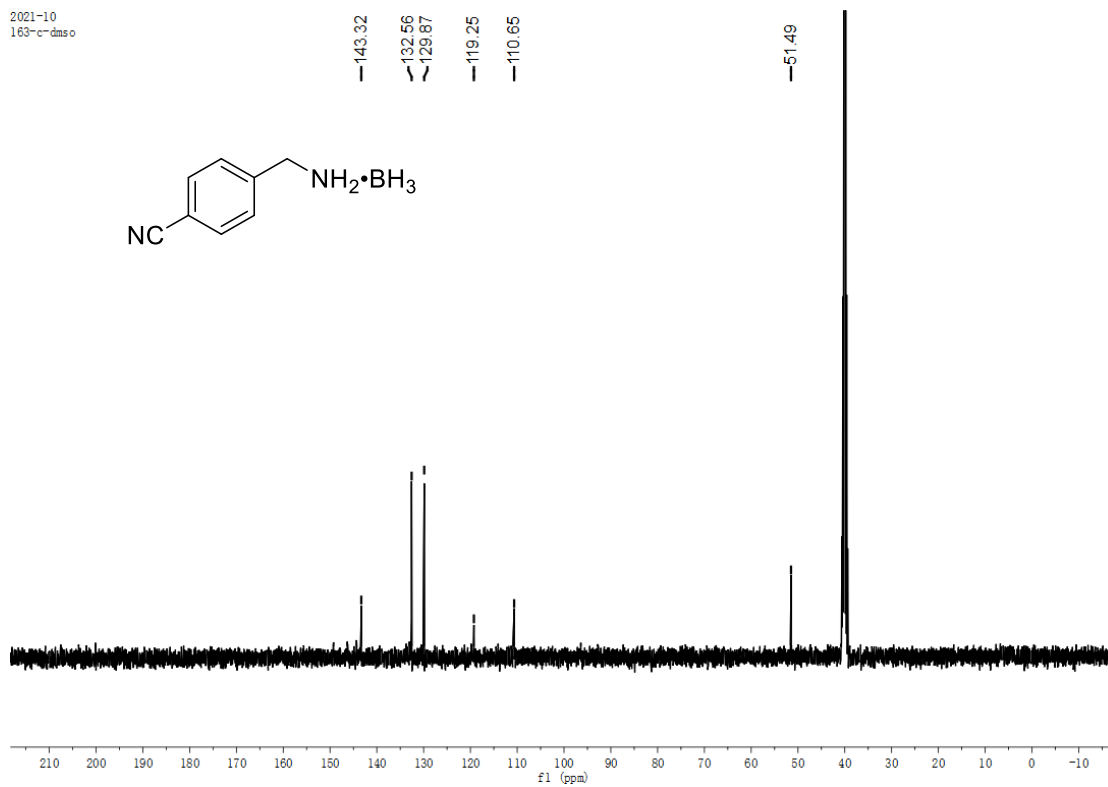

**Figure S63.** <sup>13</sup>C NMR spectrum of **2k** (400 MHz, DMSO)

119  
119  
7.2  
H

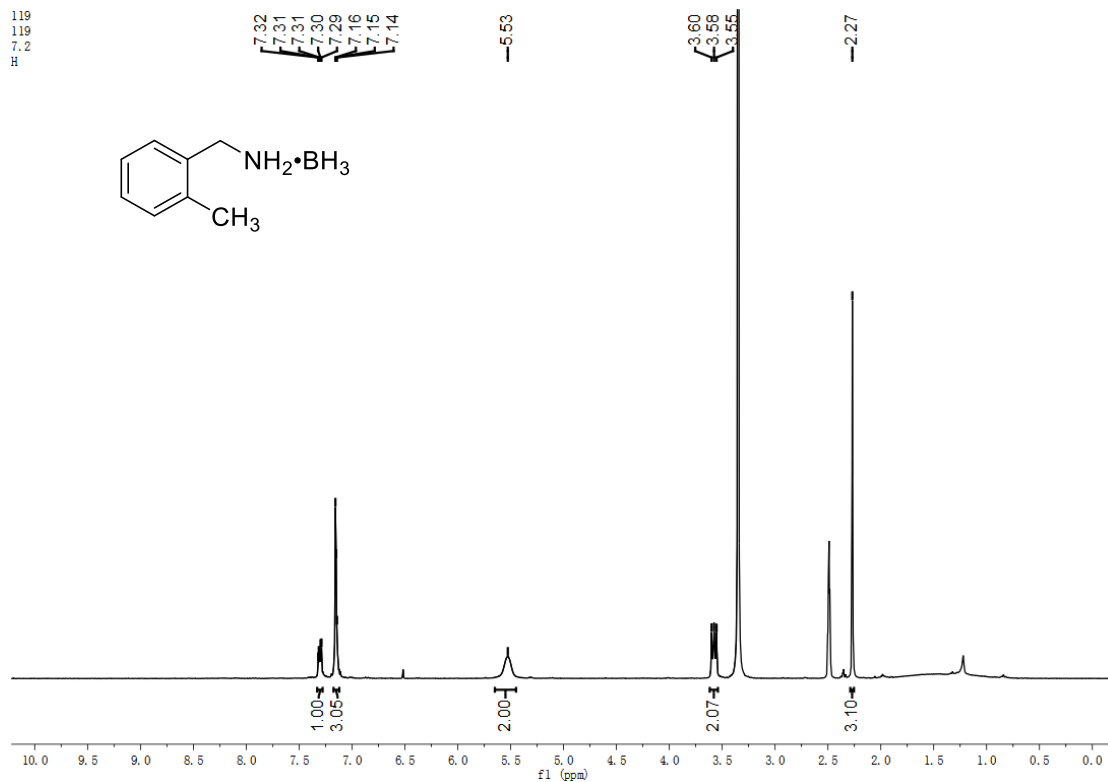

**Figure S64.**  $^1\text{H}$  NMR spectrum of **2I** (300 MHz, DMSO)

chenxuenian  
119  
dmsol  
h(b)  
PROB11DEC DMSO {D:\data} ZXM 17

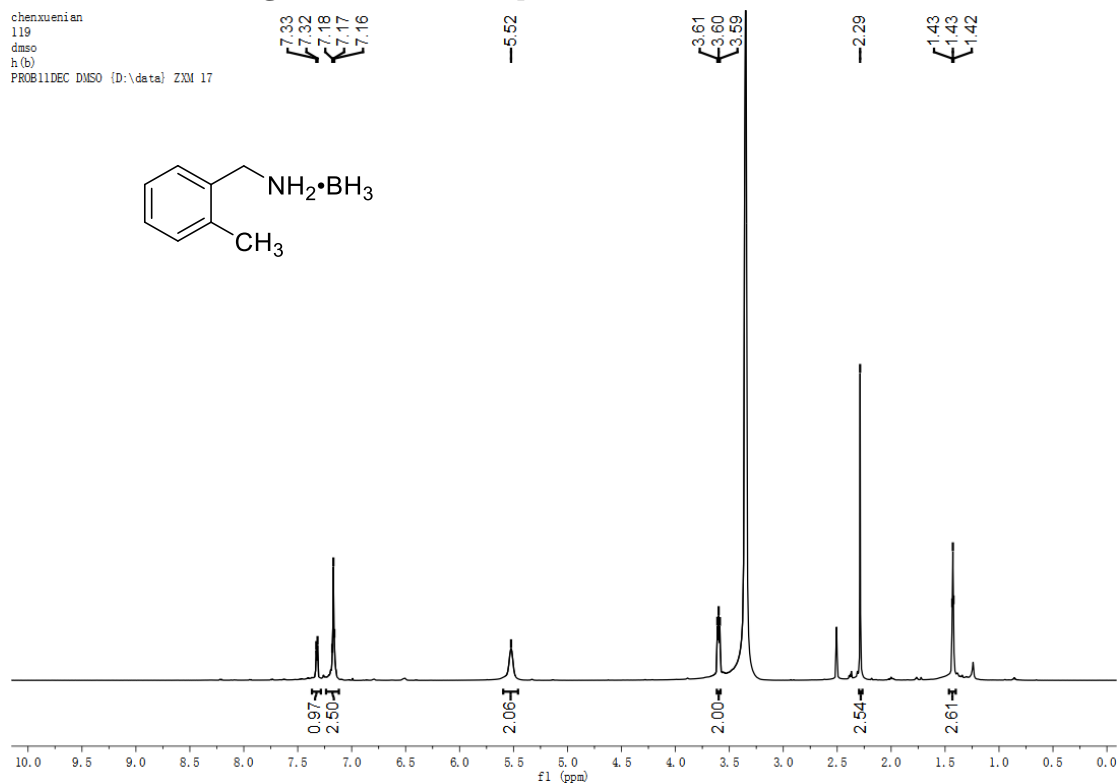

**Figure S65.**  $^1\text{H}\{\text{B}\}$  NMR spectrum of **2I** (600 MHz, DMSO)

chenxuenian  
119  
dms0  
b  
B11ZG-ZZU DMSO (D:\data) ZXM 17

18.50  
18.95

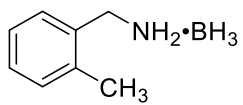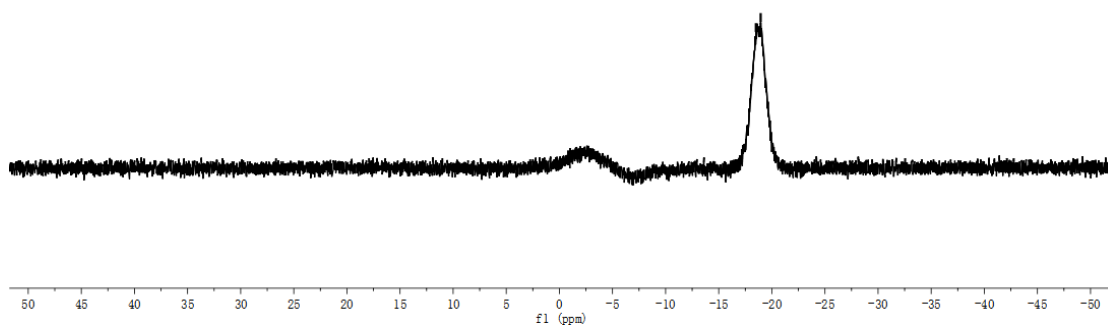

**Figure S66.**  $^{11}\text{B}$  NMR spectrum of **21** (600 MHz, DMSO)

chenxuenian  
119  
dms0  
b (h)  
B11CPD-ZZU DMSO (D:\data) ZXM 17

18.66

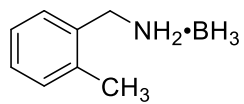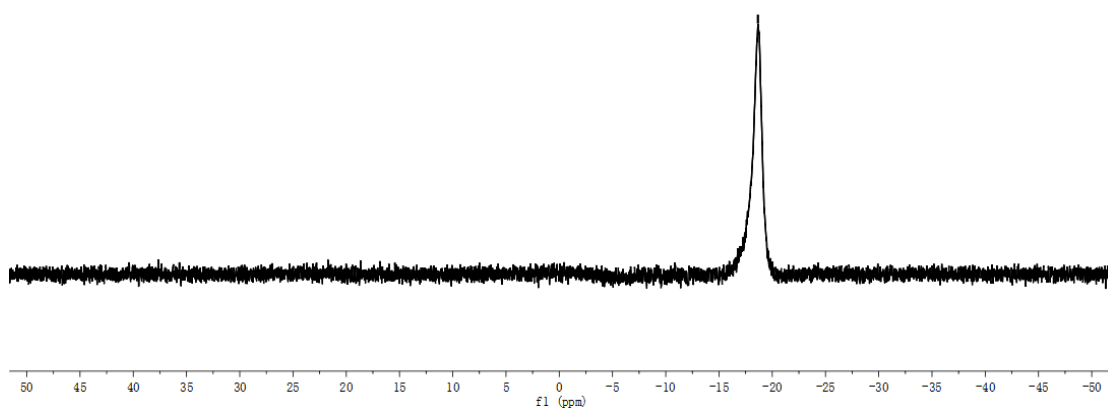

**Figure S67.**  $^{11}\text{B}\{\text{H}\}$  NMR spectrum of **21** (600 MHz, DMSO)

chenxuenian  
119  
dms  
c  
C13CPD DMSO (D:\data) ZXM 17

136.53  
135.93  
130.40  
129.36  
127.94  
126.19

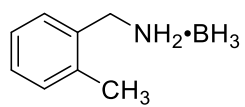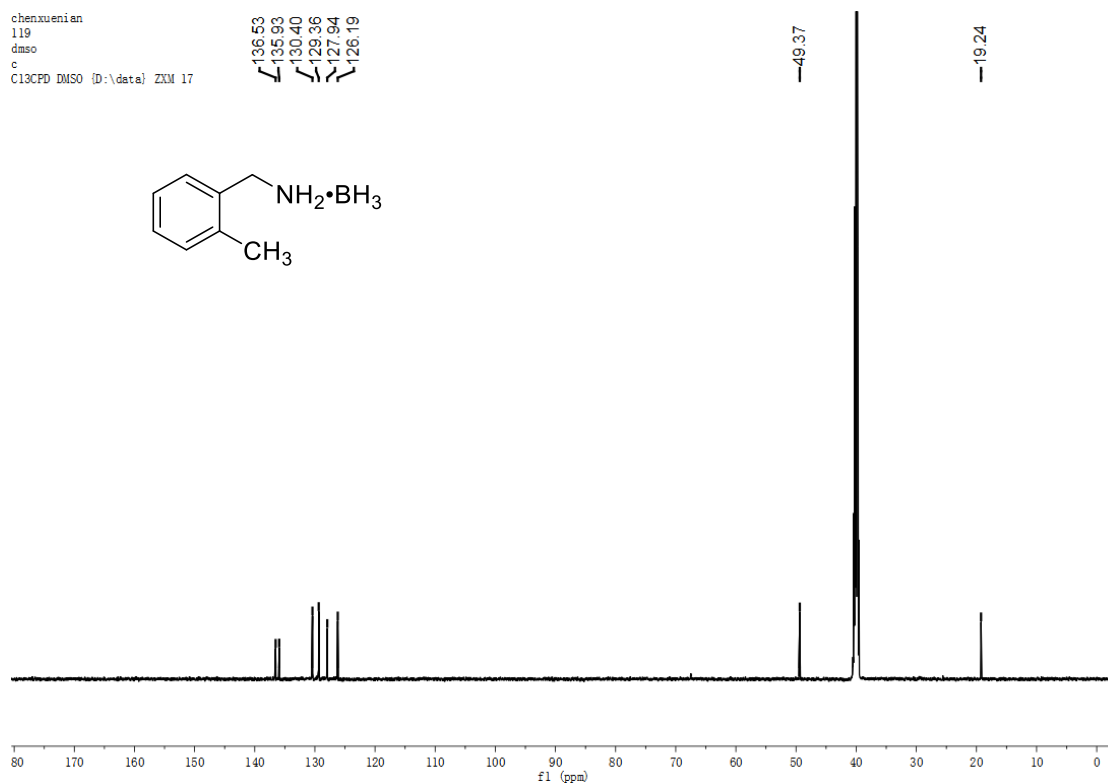

**Figure S68.**  $^{13}\text{C}$  NMR spectrum of **2I** (600 MHz, DMSO)

191  
191  
DMSO  
1H

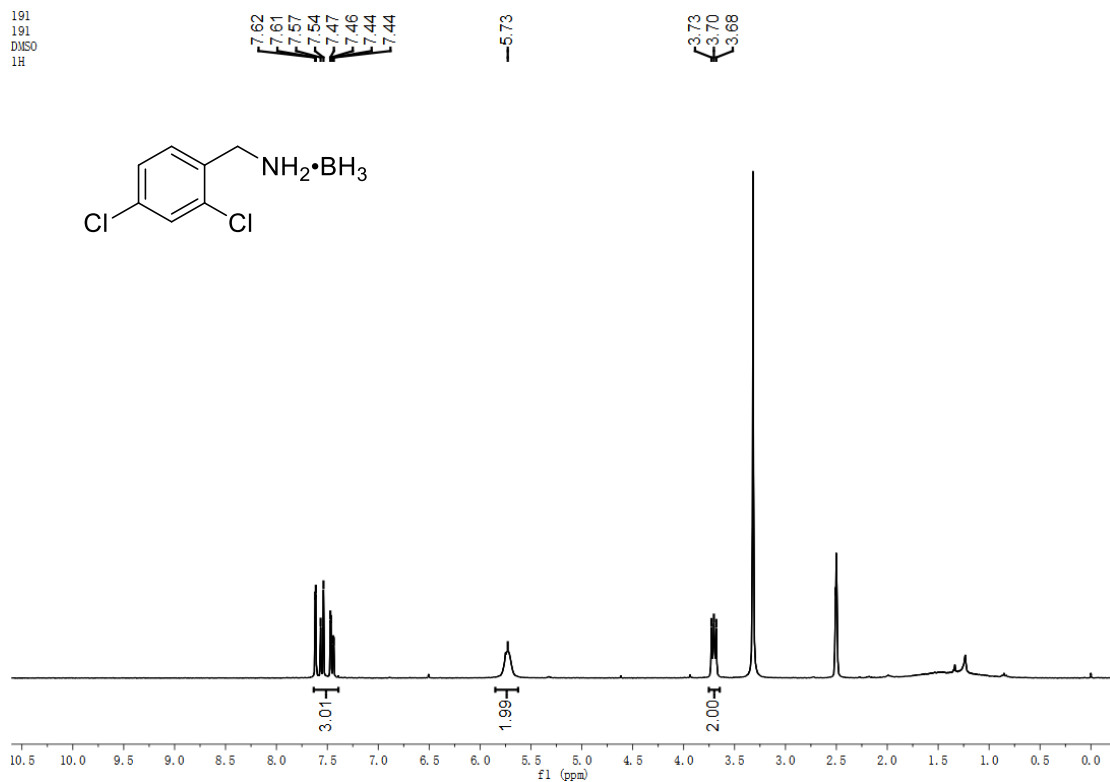

**Figure S69.**  $^1\text{H}$  NMR spectrum of **2m** (300 MHz, DMSO)

2021-9  
191-H(B)  
CDCl3

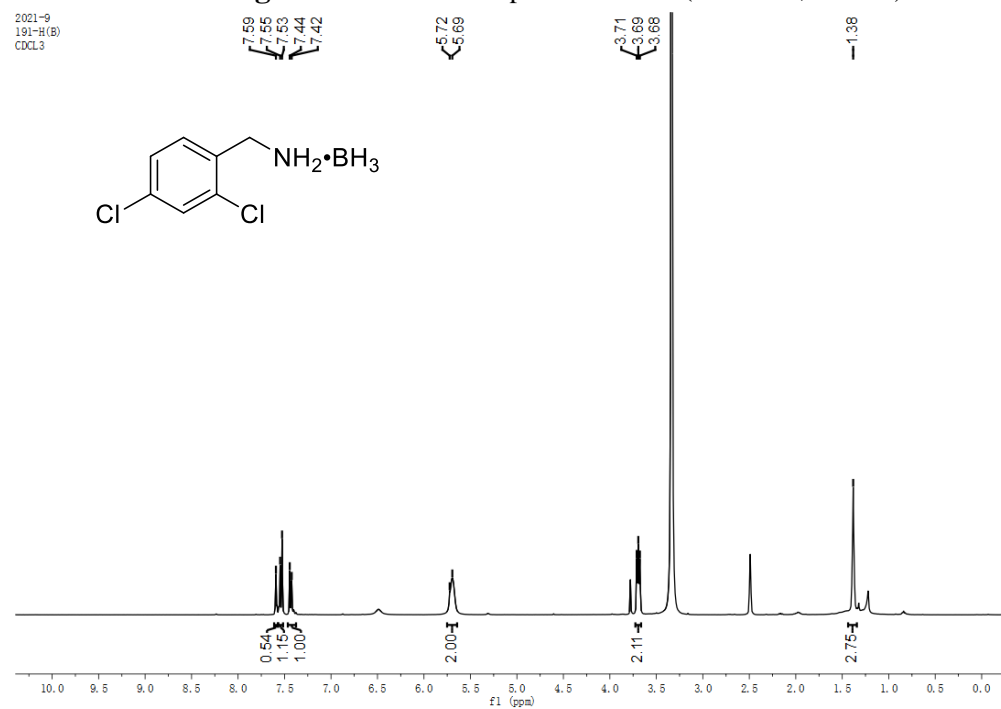

**Figure S70.**  $^1\text{H}\{\text{B}\}$  NMR spectrum of **2m** (400 MHz, DMSO)



chenxuenian  
110  
dms0  
b  
B11ZG-ZZU DMSO [D:\data] ZXM 18

18.88

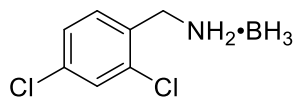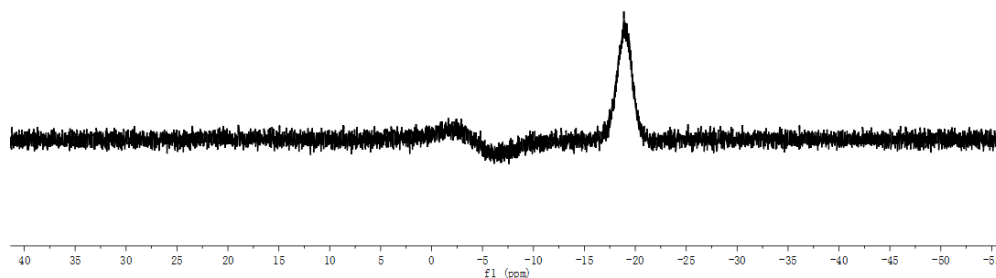

**Figure S71.**  $^{11}\text{B}\{^1\text{H}\}$  NMR spectrum of **2m** (600 MHz, DMSO)

chenxuenian  
110  
dms0  
b (2)  
B11CFD-ZZU DMSO [D:\data] ZXM 18

19.31

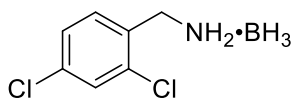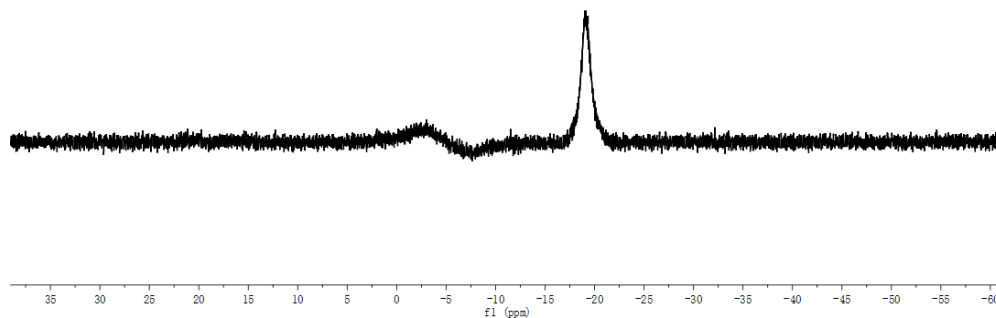

**Figure S72.**  $^{11}\text{B}\{^1\text{H}\}$  NMR spectrum of **2m** (600 MHz, DMSO)

2021-9  
191-C

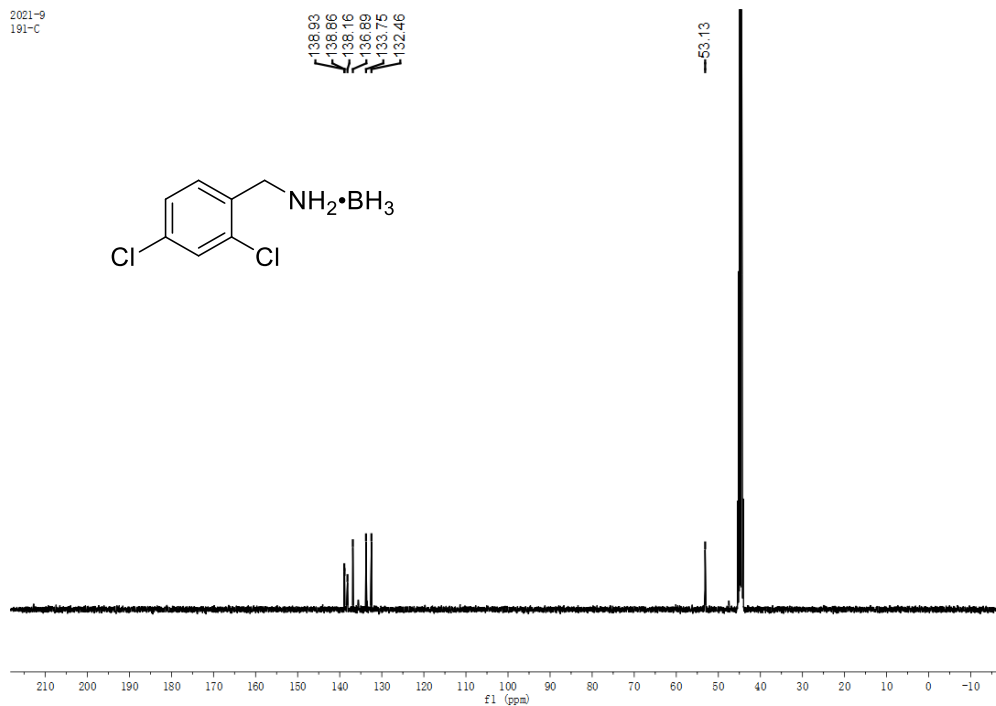

**Figure S73.** <sup>13</sup>C NMR spectrum of **2m** (400 MHz, DMSO)

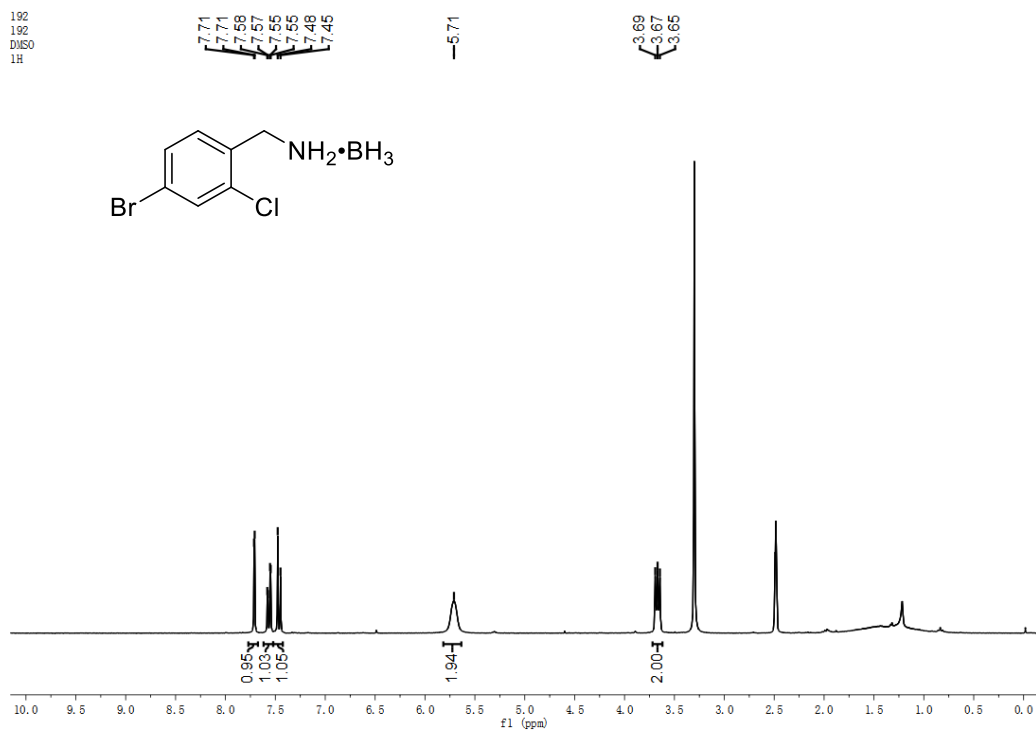

**Figure S74.**  $^1\text{H}$  NMR spectrum of **2n** (400 MHz, DMSO)

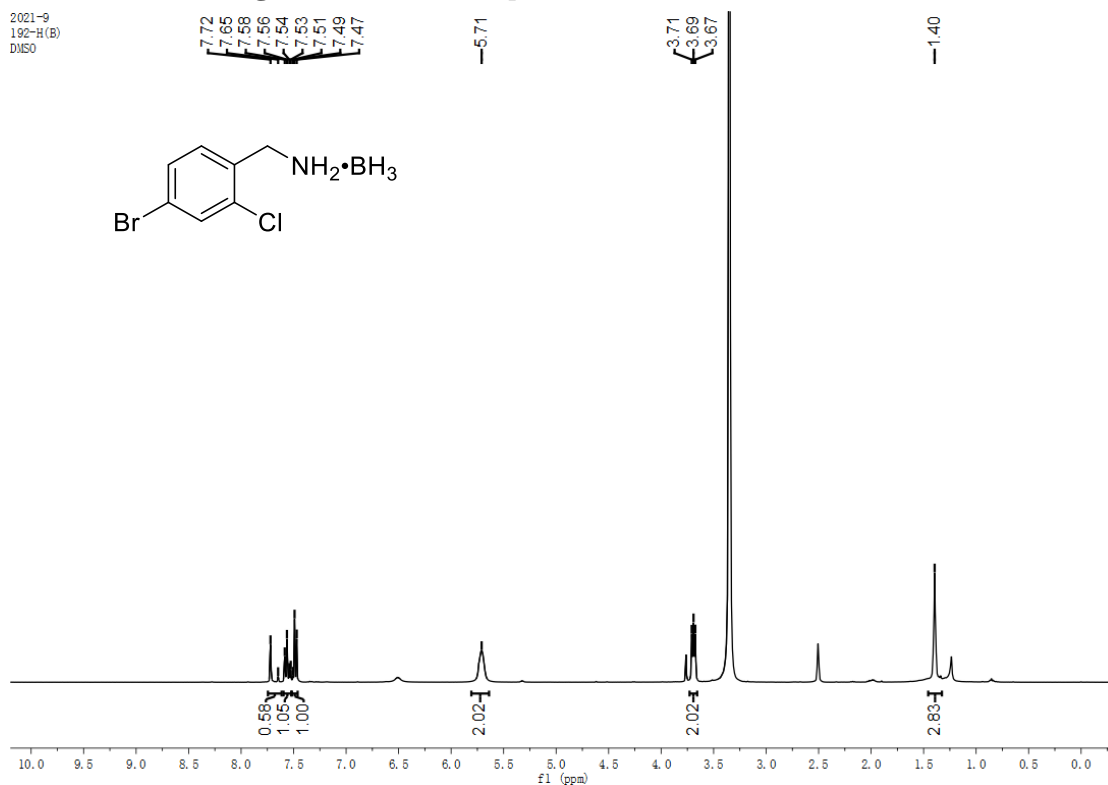

**Figure S75.**  $^1\text{H}\{\text{B}\}$  NMR spectrum of **2n** (400 MHz, DMSO)

2021-9  
192-B  
DMSO

18.71

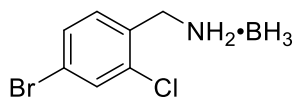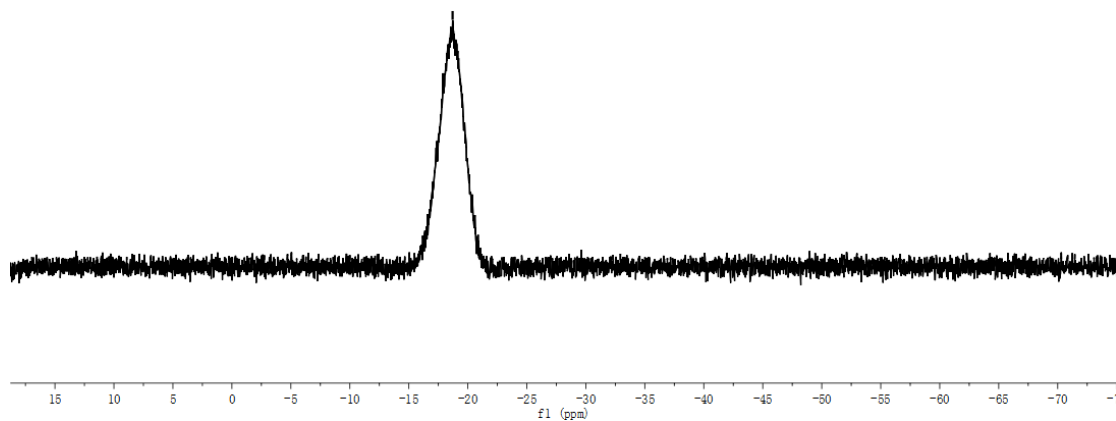

**Figure S76.**  $^{11}\text{B}$  NMR spectrum of **2n** (400 MHz, DMSO)

2021-9  
192-B (H)  
DMSO

18.89

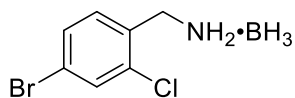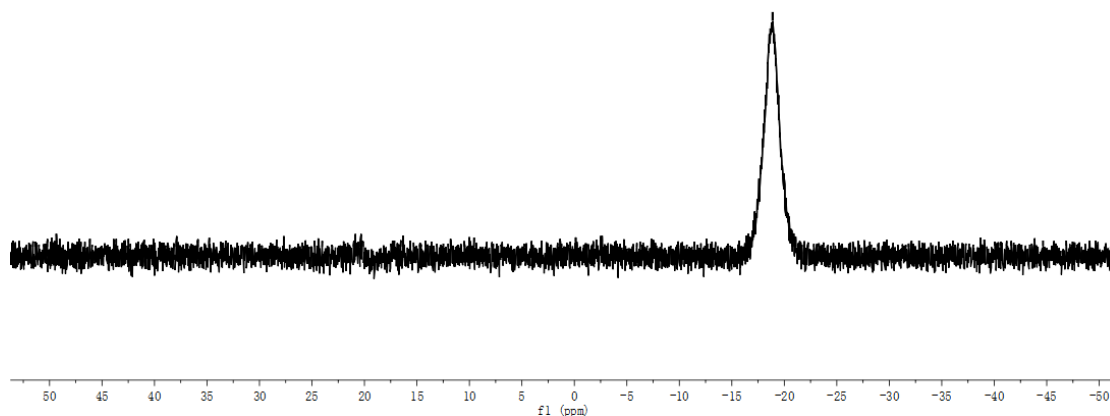

**Figure S77.**  $^{11}\text{B}\{\text{H}\}$  NMR spectrum of **2n** (400 MHz, DMSO)

2021-9  
192-C  
DMSO

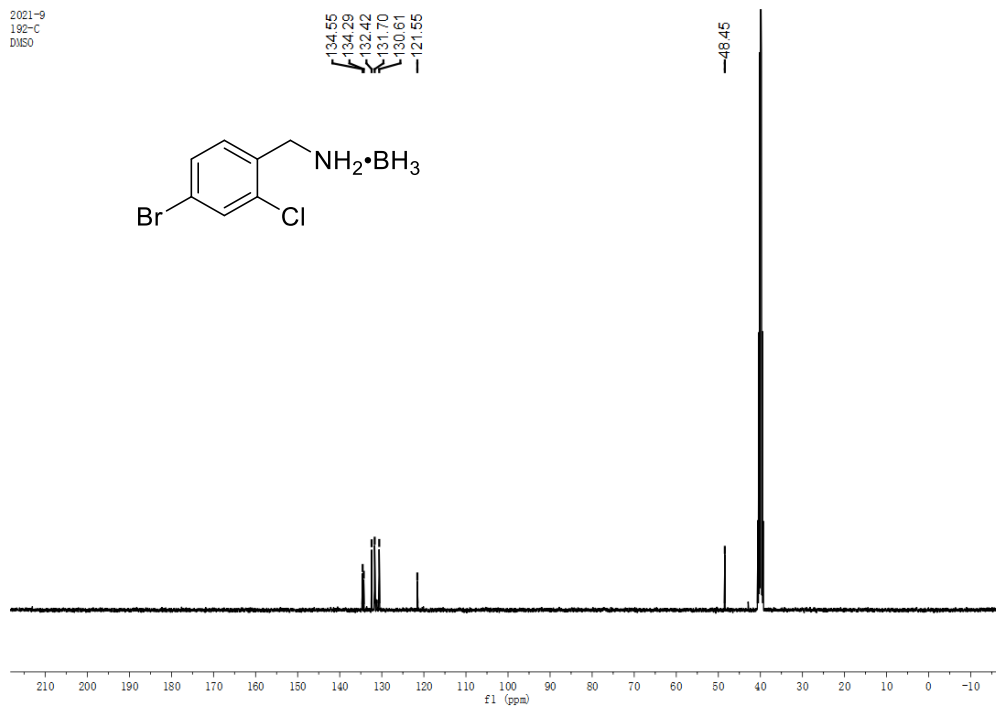

**Figure S78.** <sup>13</sup>C NMR spectrum of **2n** (400 MHz, DMSO)

2021-9  
135-DMS-H

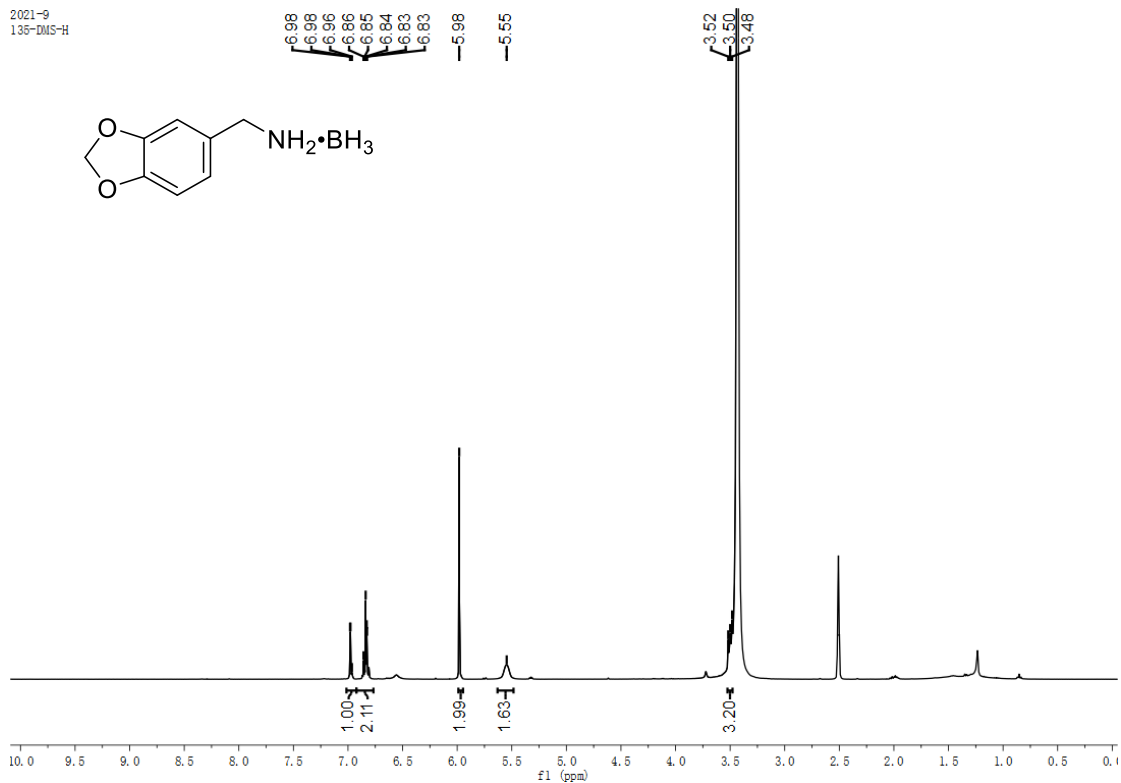

**Figure S79.**  $^1\text{H}$  NMR spectrum of **2o** (400 MHz, DMSO)

2021-9  
135-DMSO-H(B)

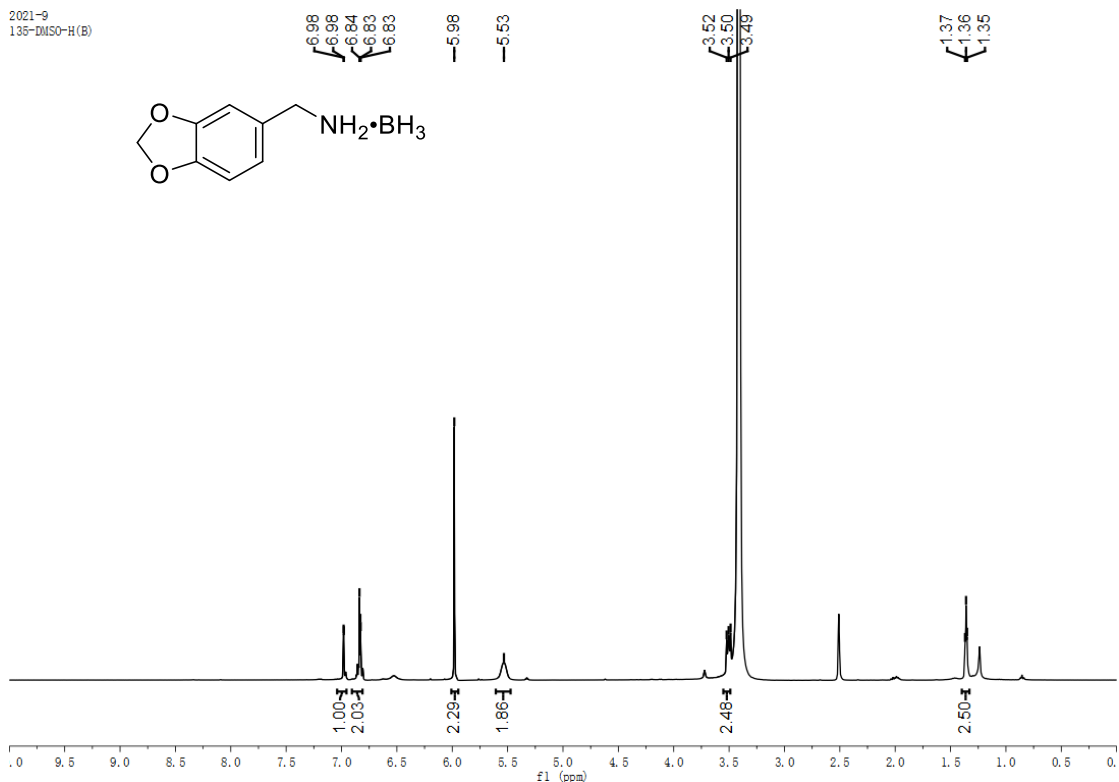

**Figure S80.**  $^1\text{H}\{\text{B}\}$  NMR spectrum of **2o** (400 MHz, DMSO)

2021-9  
135-DMSO-B

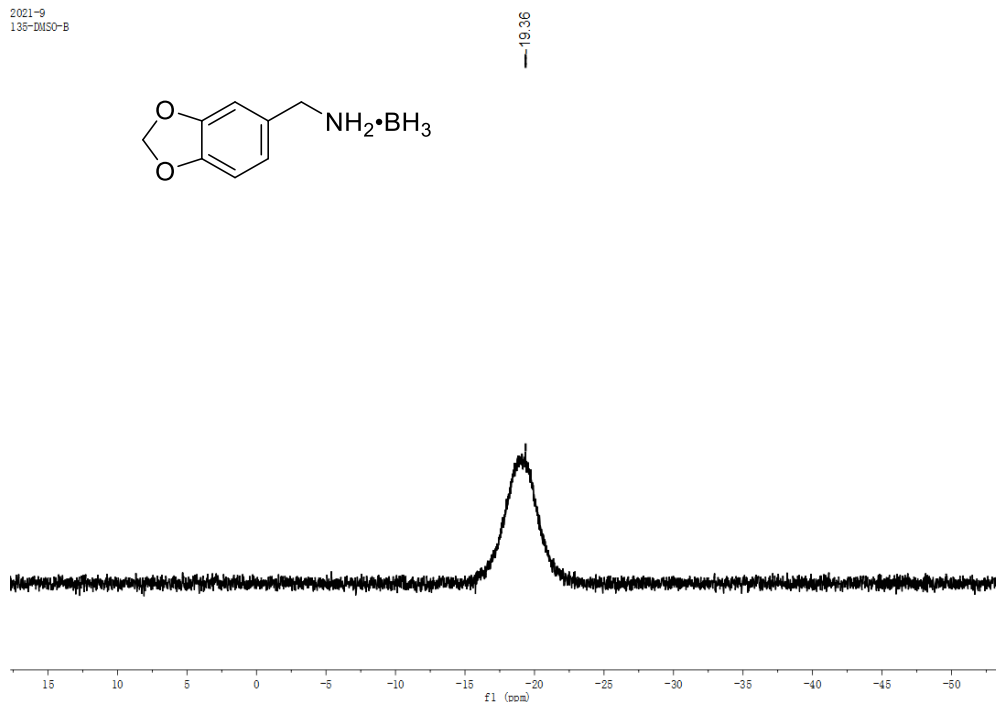

**Figure S81.**  $^{11}\text{B}$ NMR spectrum of **2o** (400 MHz, DMSO)

2021-9  
135-DMSO-B(H)

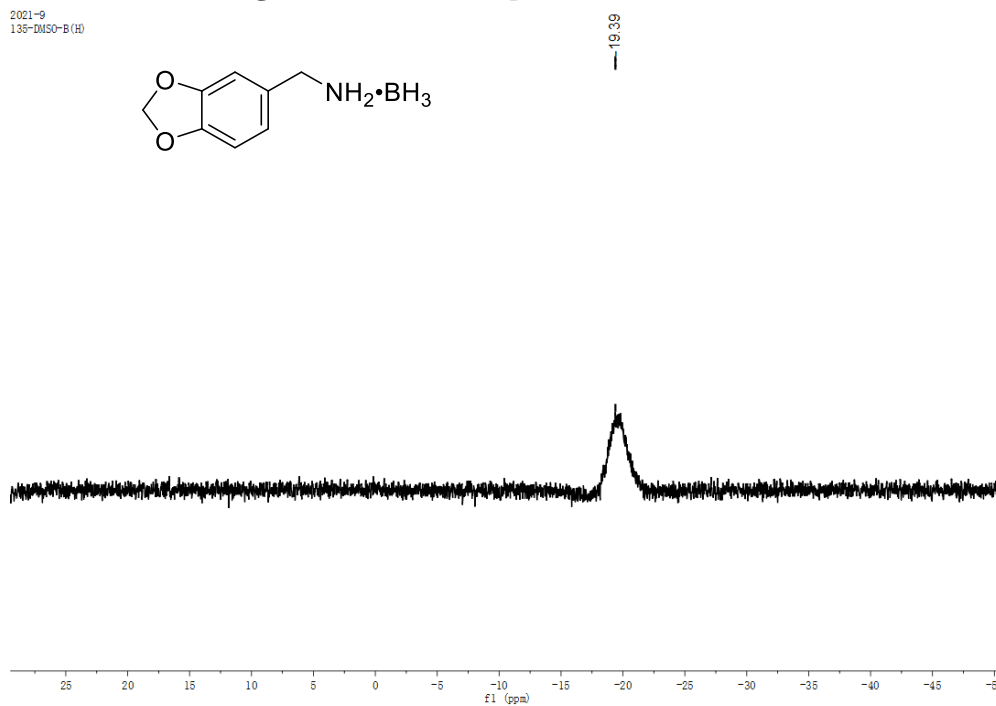

**Figure S82.**  $^{11}\text{B}\{\text{H}\}$  NMR spectrum of **2o** (400 MHz, DMSO)

2021-9  
135-DMSO-C

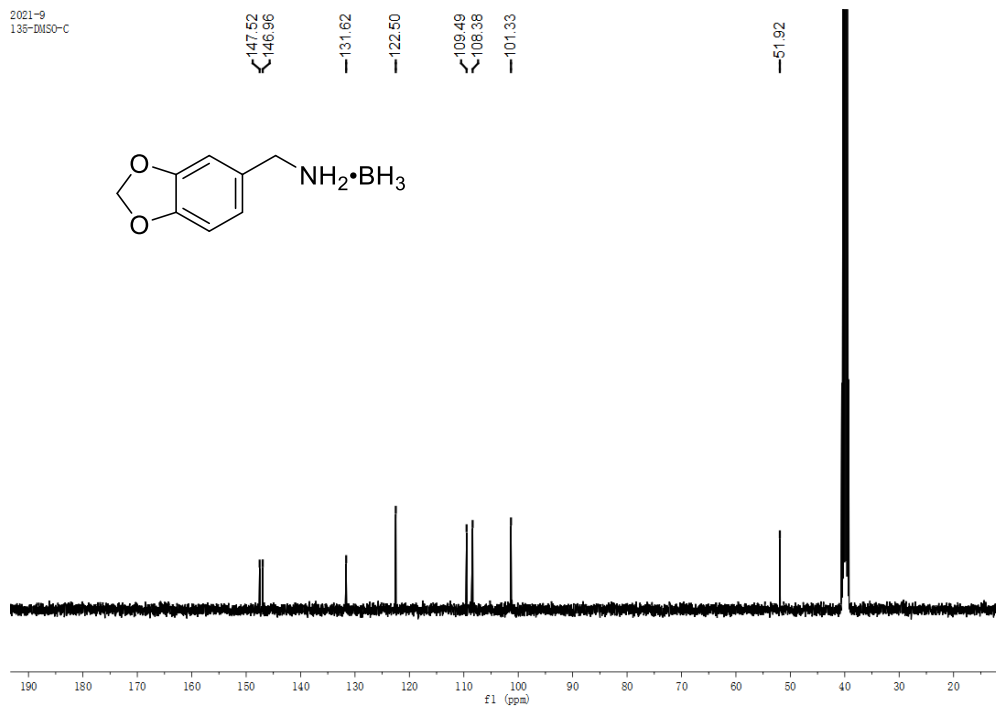

**Figure S83.**  $^{13}\text{C}$  NMR spectrum of **2o** (400 MHz, DMSO)



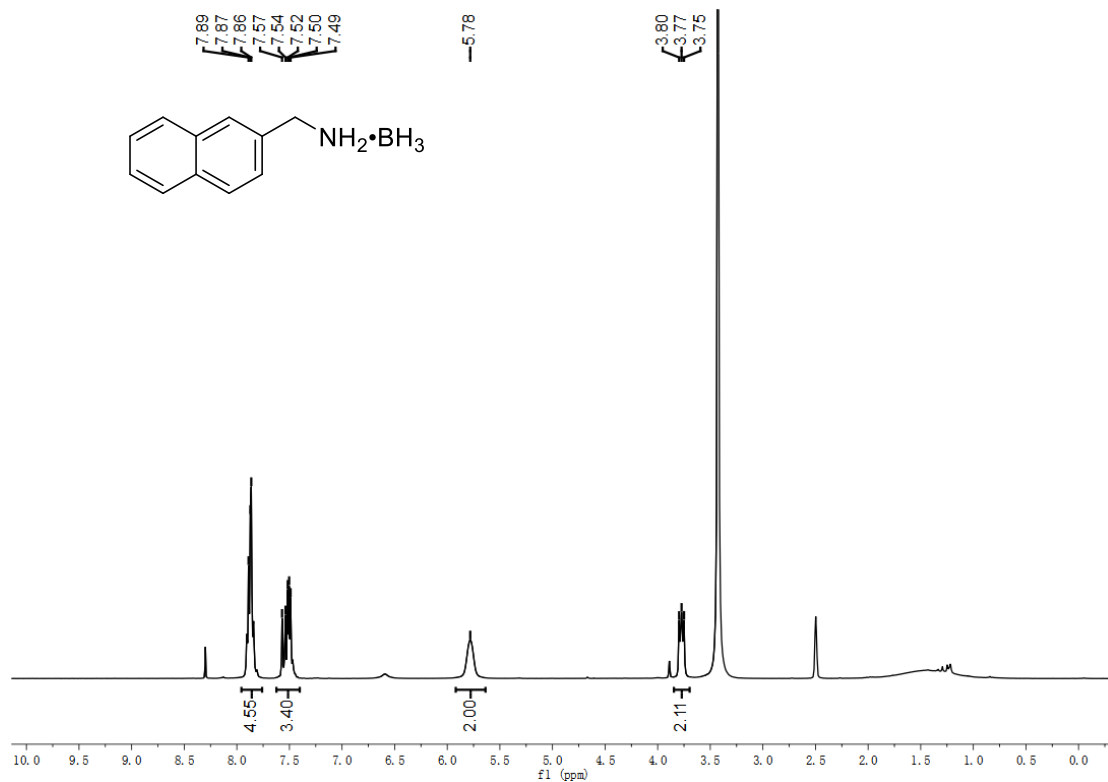

**Figure S84.** <sup>1</sup>H NMR spectrum of **2p** (300 MHz, DMSO)

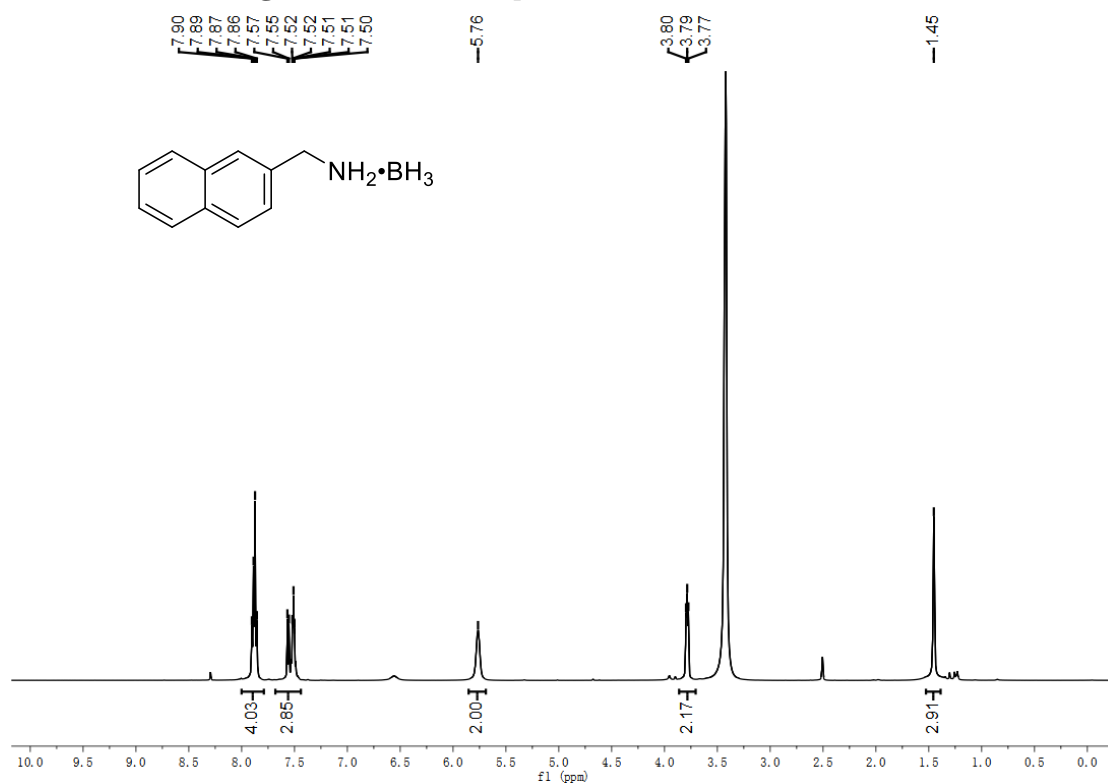

**Figure S85.** <sup>1</sup>H{B} NMR spectrum of **2p** (600 MHz, DMSO)

173/113  
b  
B112G-ZZU DMSO {D:\data} ZXM 7

18.60

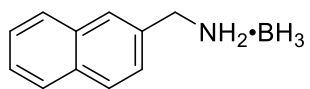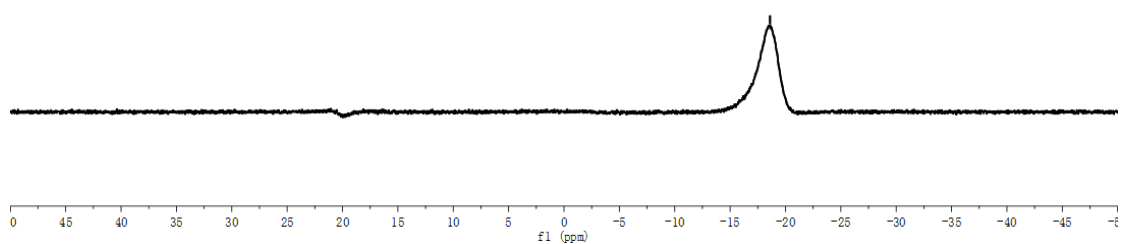

**Figure S86.**  $^{11}\text{B}$  NMR spectrum of **2p** (600 MHz, DMSO)

173/113 NMR (193 MHz, DMSO) 6 -18.92 (s).  
b (h)  
B11CPD-ZZU DMSO {D:\data} ZXM 7

18.92

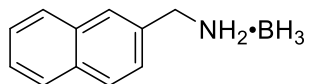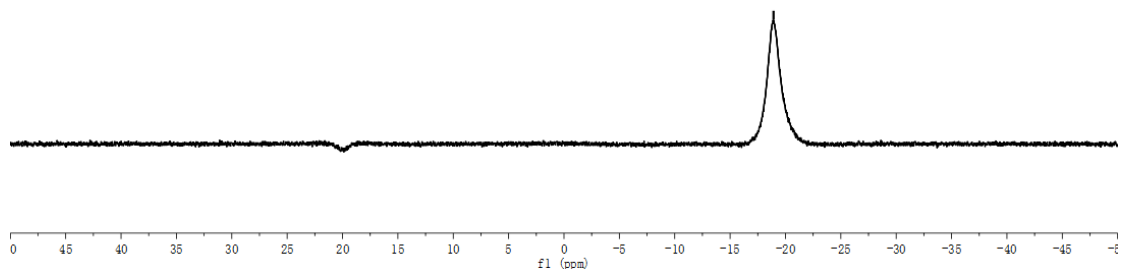

**Figure S87.**  $^{11}\text{B}\{^1\text{H}\}$  NMR spectrum of **2p** (600 MHz, DMSO)

chenxuenian  
73/113  
C  
dms  
C13CPD DMSO (D:\data\ ZXM 11

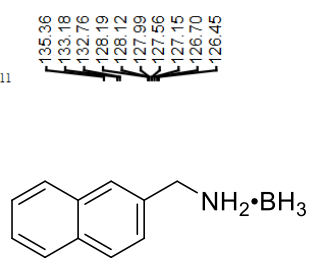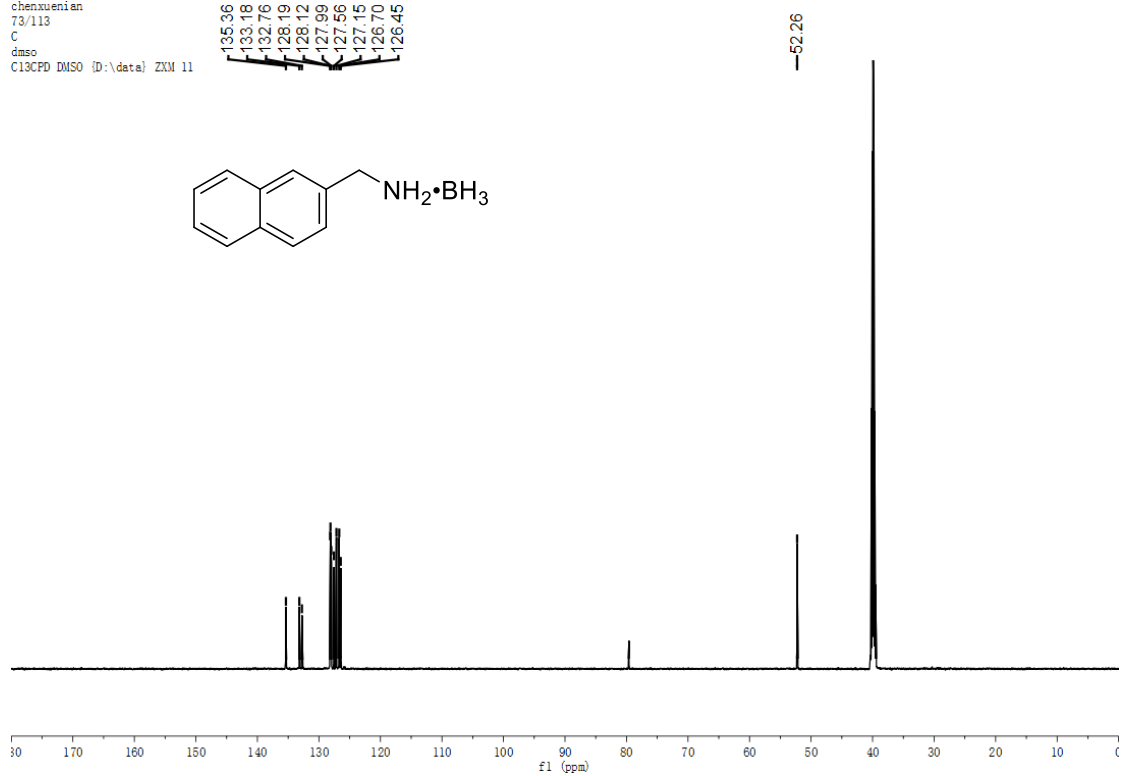

**Figure S88.** <sup>13</sup>C NMR spectrum of **2p** (600 MHz, DMSO)

2021-10  
225-H-DMSO

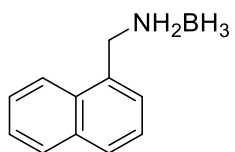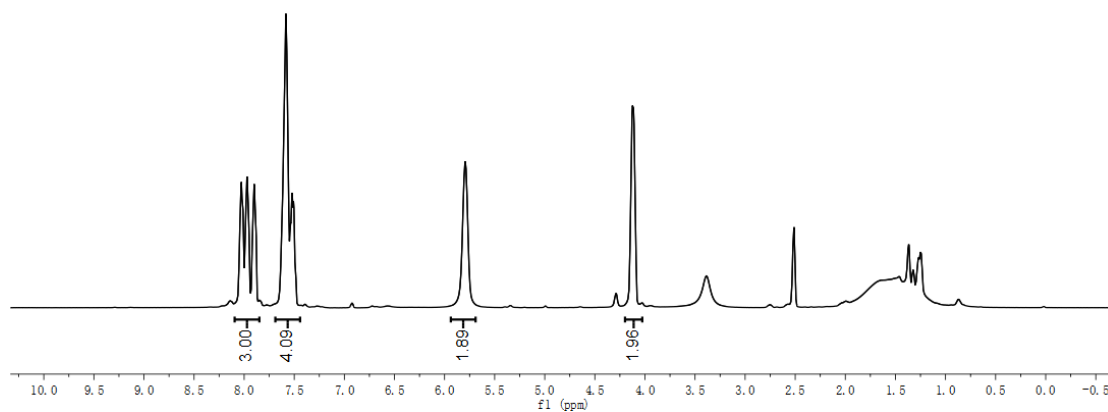

**Figure S89.** <sup>1</sup>H NMR spectrum of **2q** (400 MHz, DMSO)

2021-10  
225-dmsor-h(b)

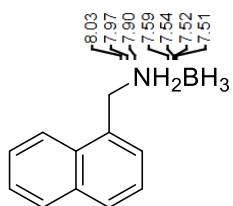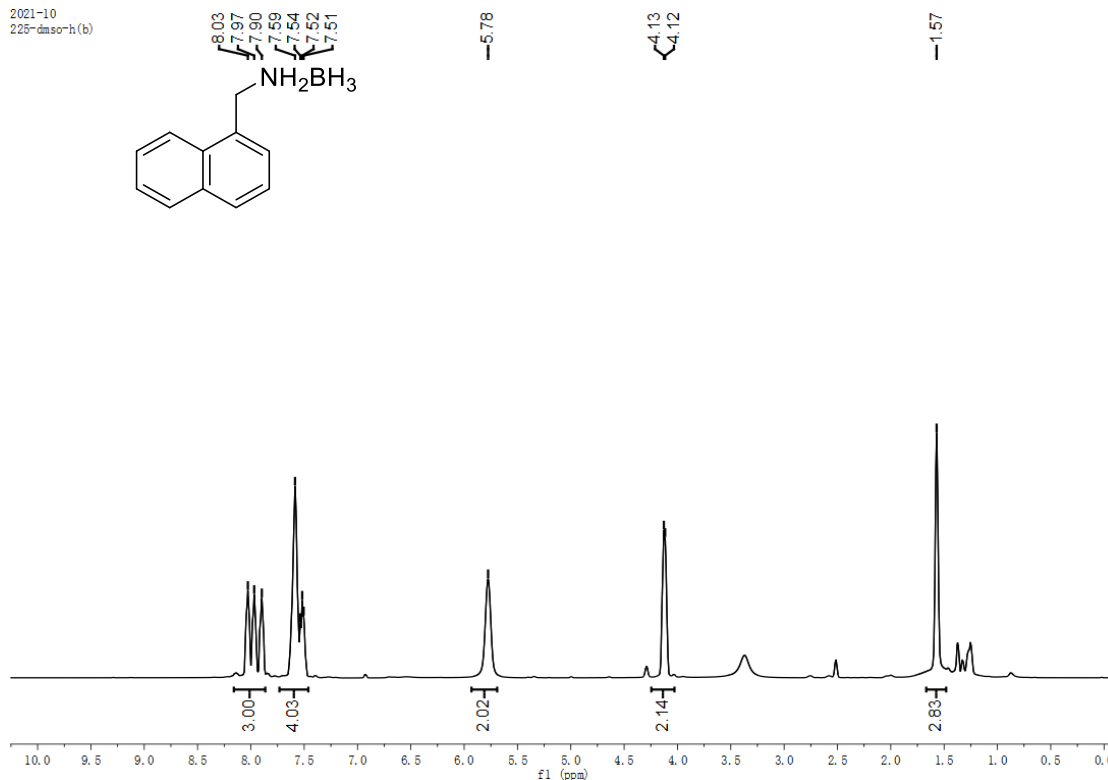

**Figure S90.** <sup>1</sup>H{B} NMR spectrum of **2q** (400 MHz, DMSO)

2021-10  
225-dmsoc

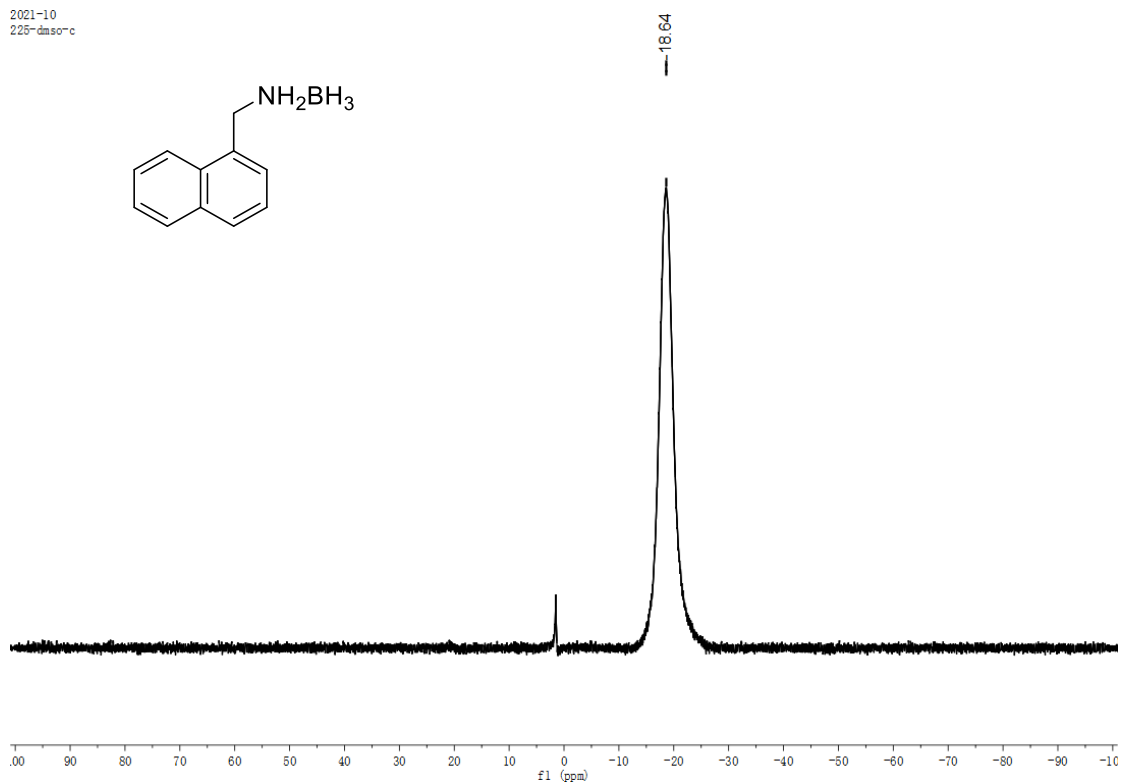

**Figure S91.**  $^{11}\text{B}$  NMR spectrum of **2q** (400 MHz, DMSO)

2021-10  
225-dmsob(h)

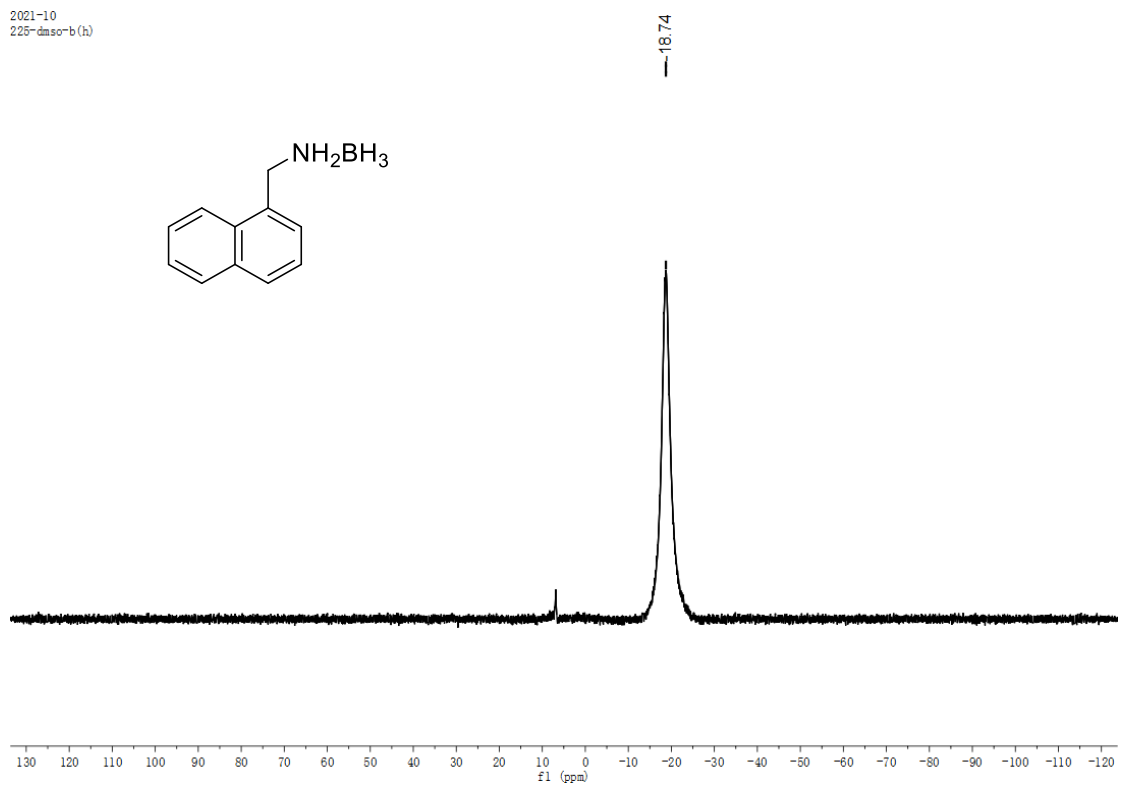

**Figure S92.**  $^{11}\text{B}\{\text{H}\}$  NMR spectrum of **2q** (400 MHz, DMSO)

2021-10  
225-dmsol-c

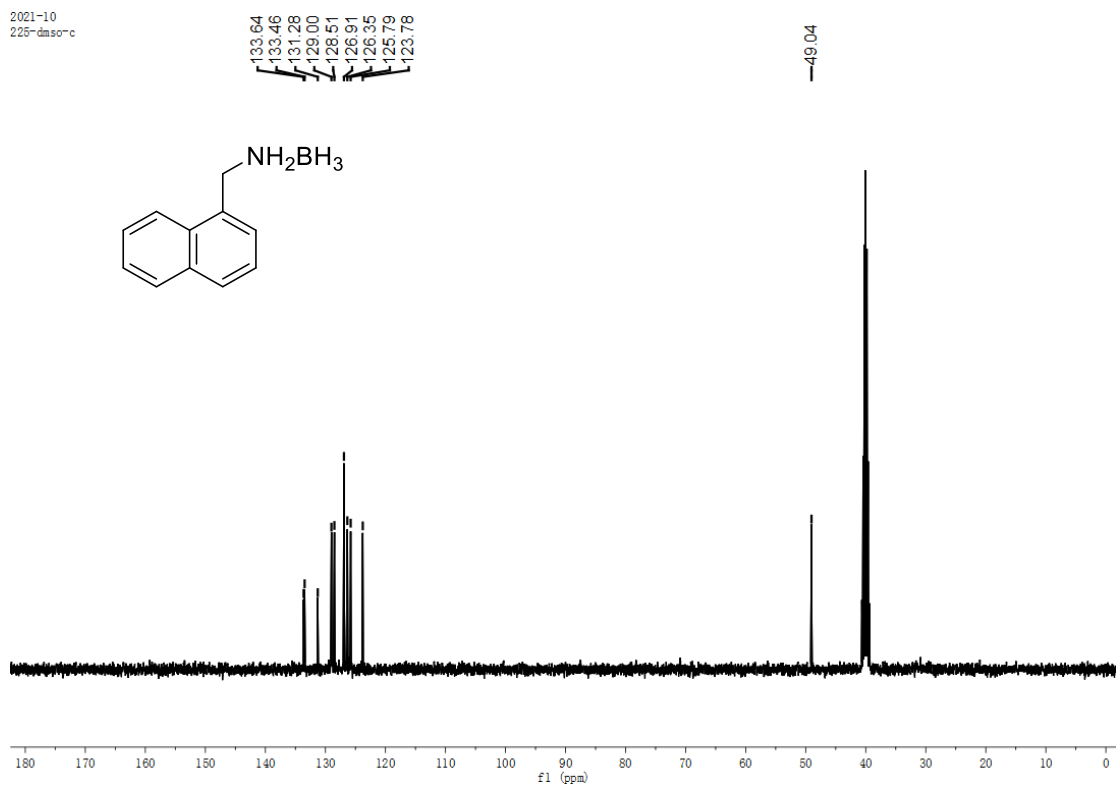

**Figure S93.** <sup>13</sup>C NMR spectrum of **2q** (400 MHz, DMSO)

20211111-pjm  
123-dmsor-h

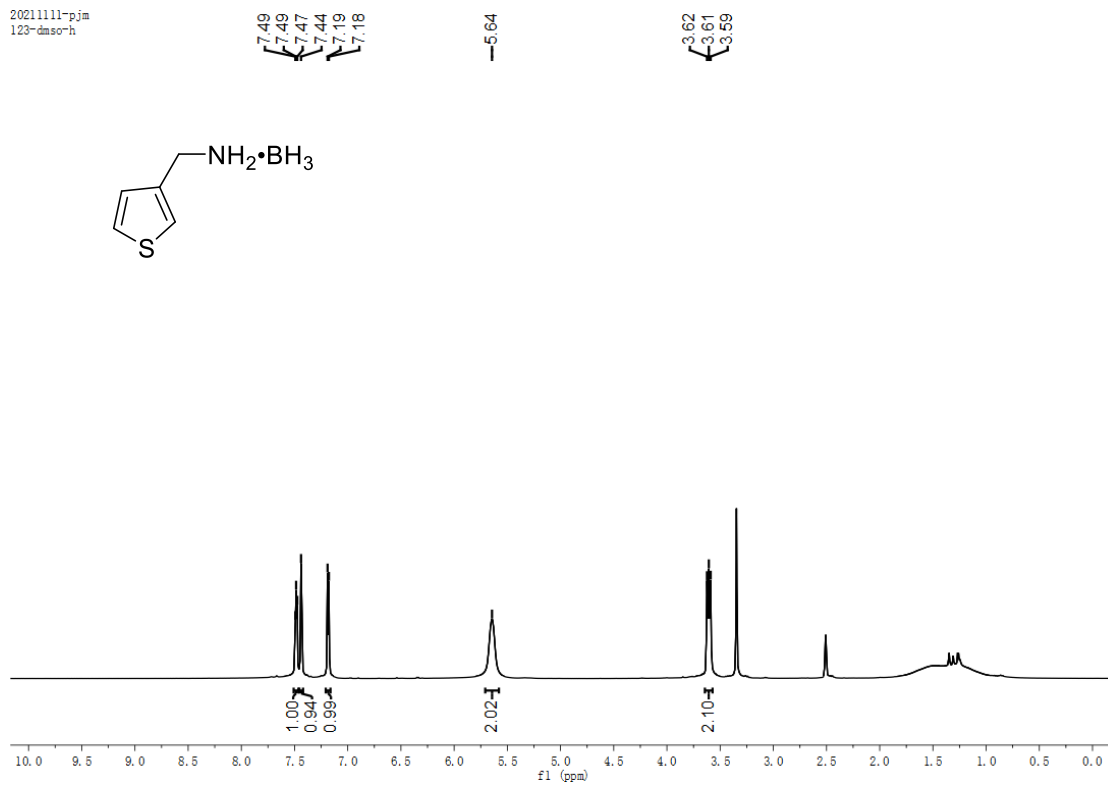

**Figure S94.**  $^1\text{H}$  NMR spectrum of **2r** (400 MHz, DMSO)

20211111-pjm  
123-dmsor-h(b)

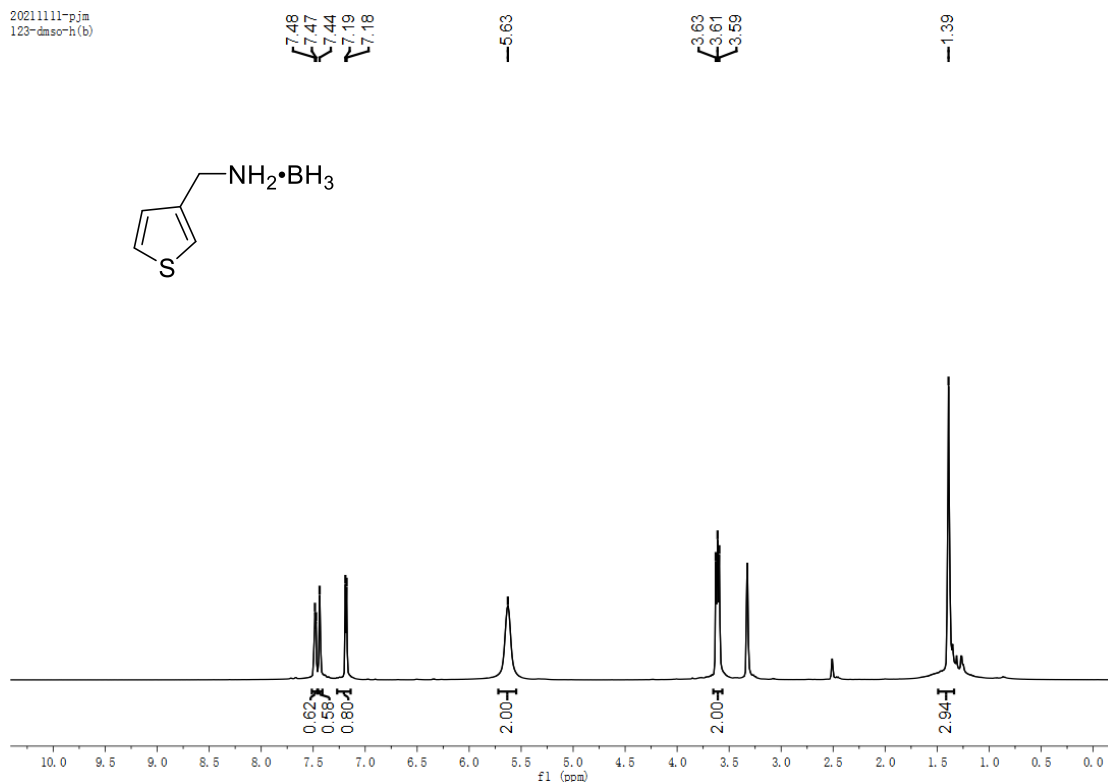

**Figure S95.**  $^1\text{H}\{\text{B}\}$  NMR spectrum of **2r** (400 MHz, DMSO)

20211111-pjm  
123-dmsor-b

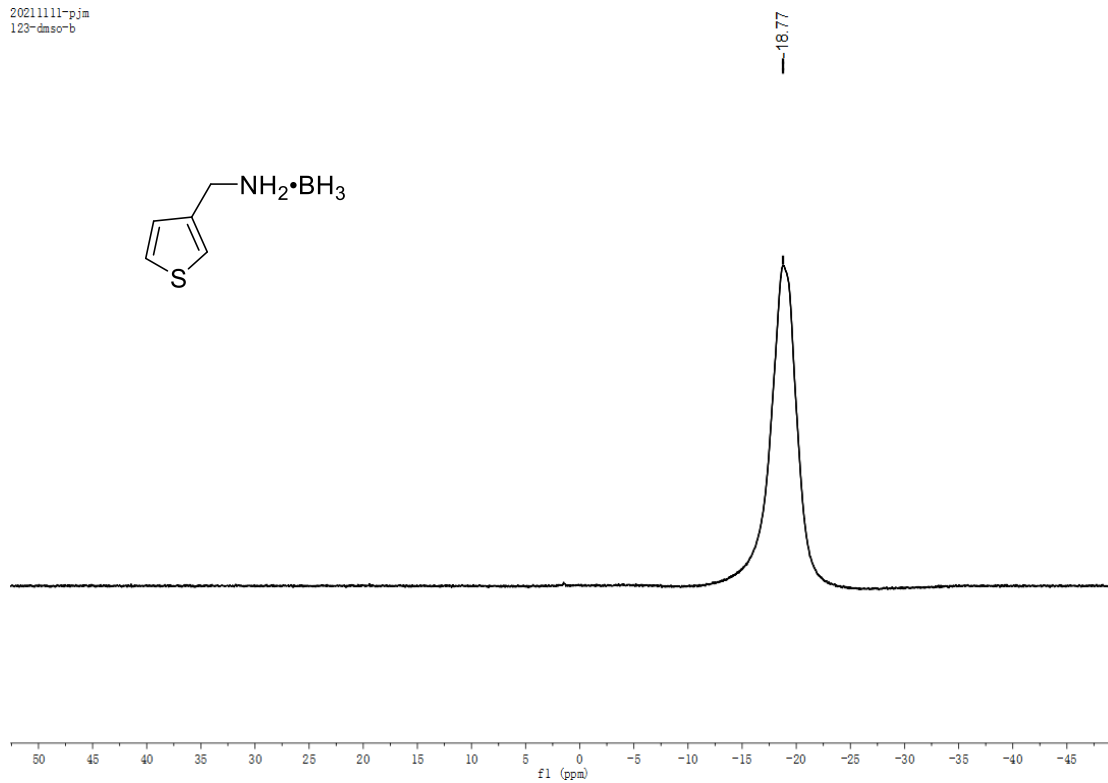

**Figure S96.**  $^{11}\text{B}$  NMR spectrum of **2r** (400 MHz, DMSO)

20211111-pjm  
123-dmsor-b(h)

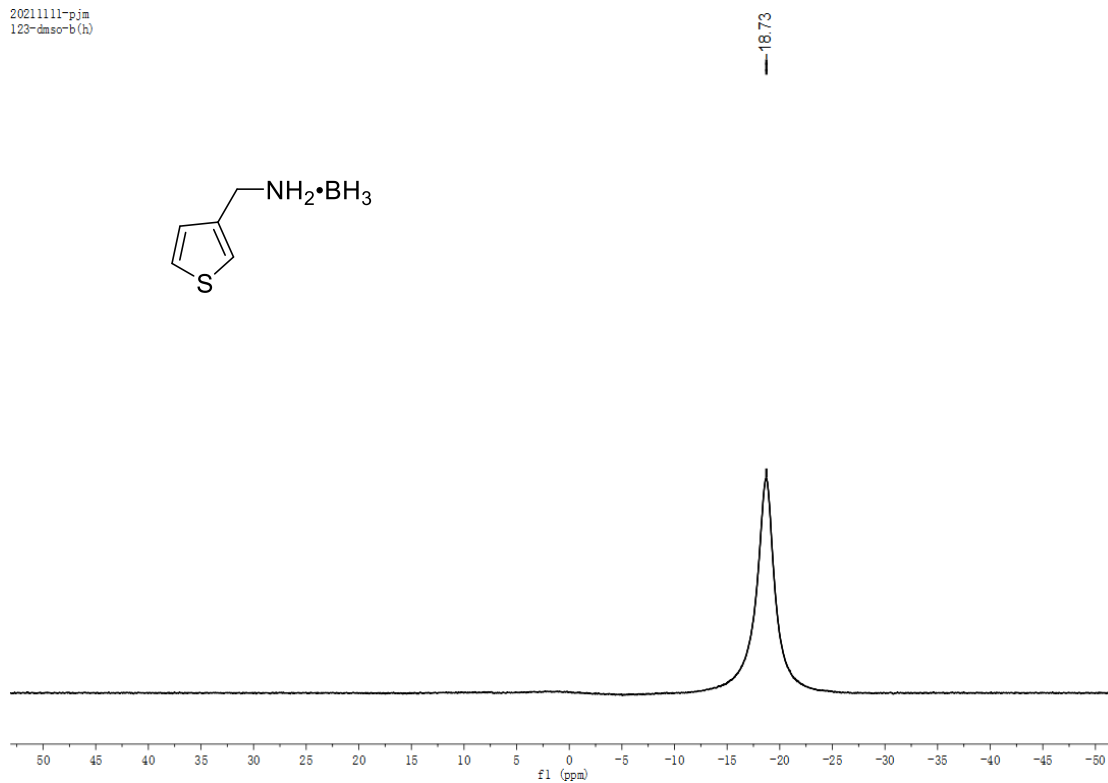

**Figure S97.**  $^{11}\text{B}\{\text{H}\}$  NMR spectrum of **2r** (400 MHz, DMSO)



峰号  
123-dmsol-c

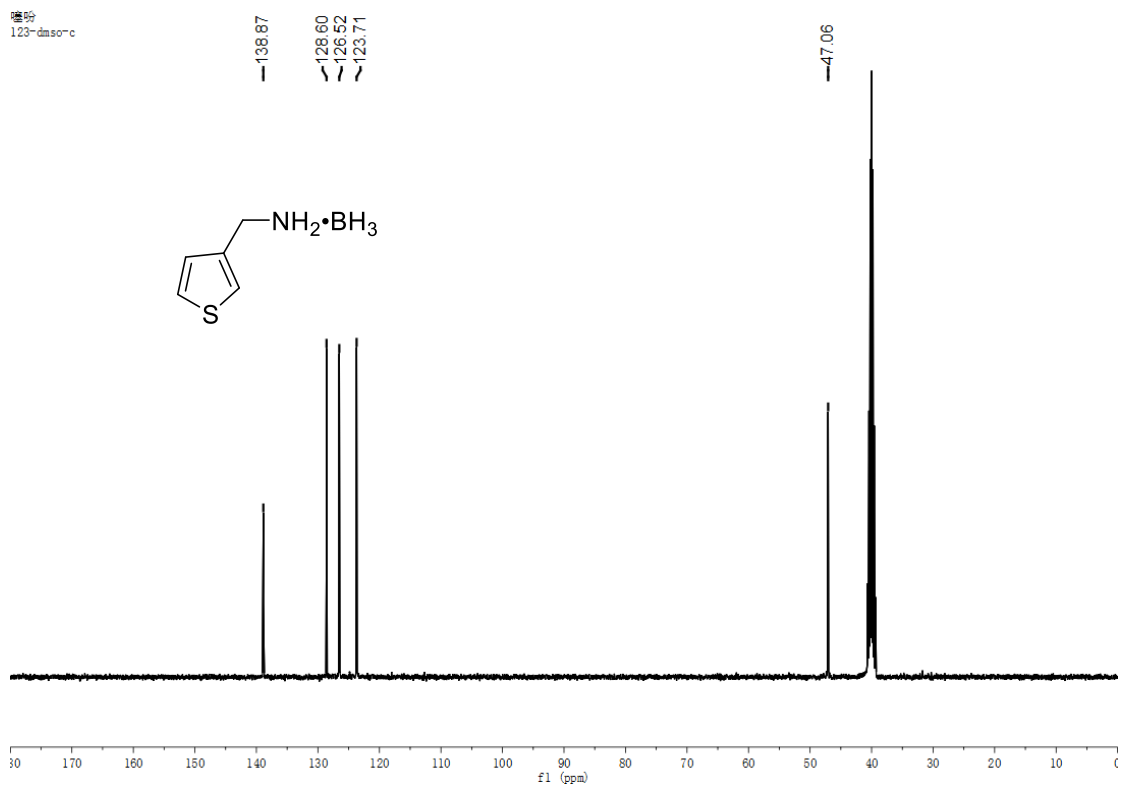

**Figure S98.**  $^{13}\text{C}$  NMR spectrum of **2r** (400 MHz, DMSO)

124  
124-2  
6.11  
H

8.30  
7.68  
7.66  
7.36  
7.28  
7.27  
7.04  
7.02  
6.58

4.07  
4.05  
4.02  
3.85

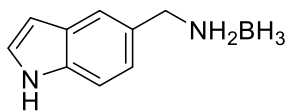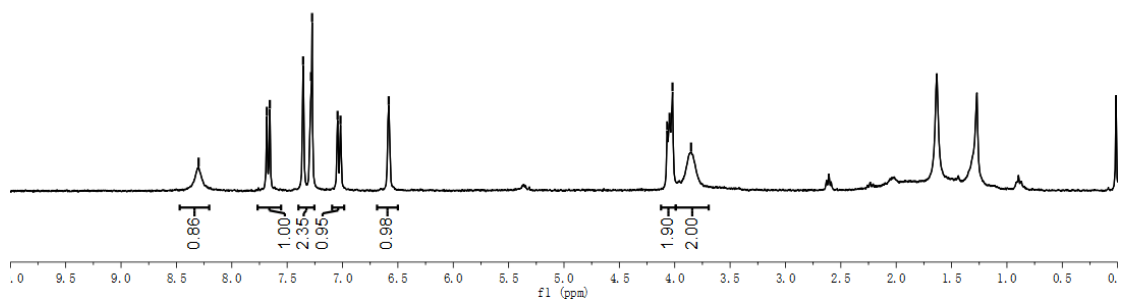

Figure S99  $^1\text{H}$  NMR spectrum of **2s** (300 MHz, DMSO)

2021-11  
124-dmso-h(b)

7.48  
7.46  
7.40  
7.32  
7.02  
7.00

5.76  
5.58

3.69  
3.67  
3.66

1.42

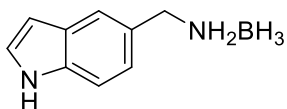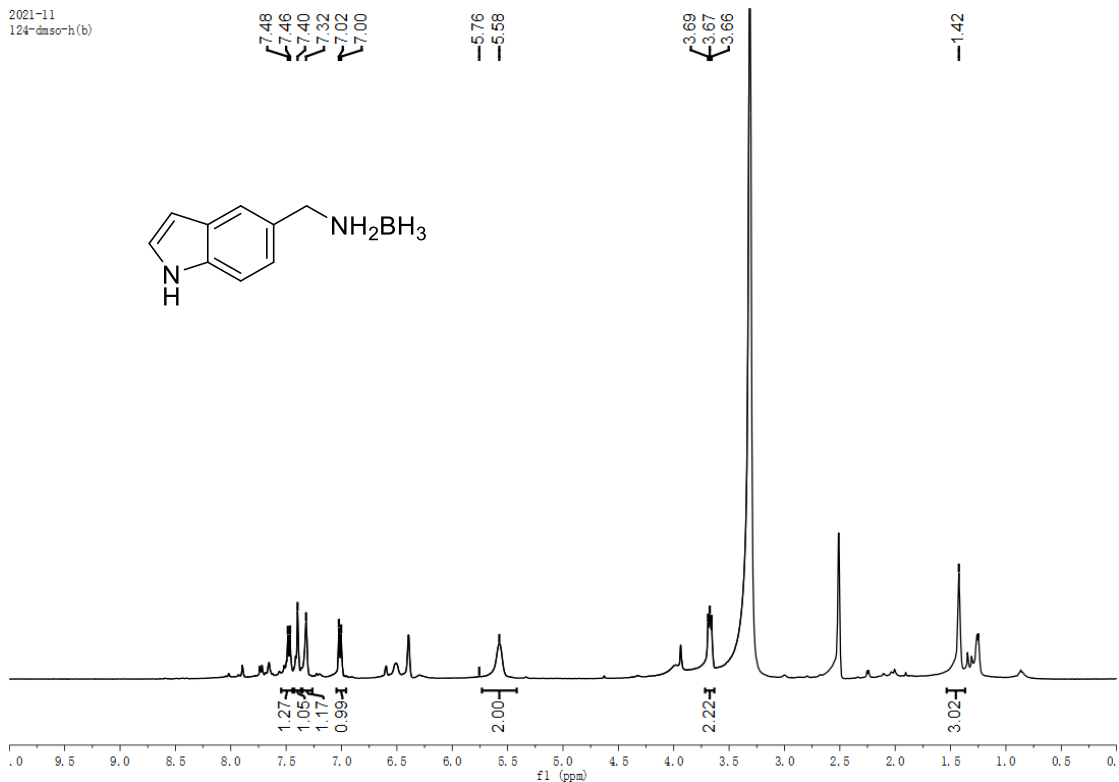

Figure S100.  $^1\text{H}\{\text{B}\}$  NMR spectrum of **2s** (400 MHz, DMSO)

2021-11  
124-dmsor-b

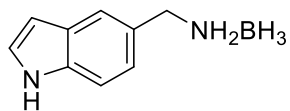

18.49

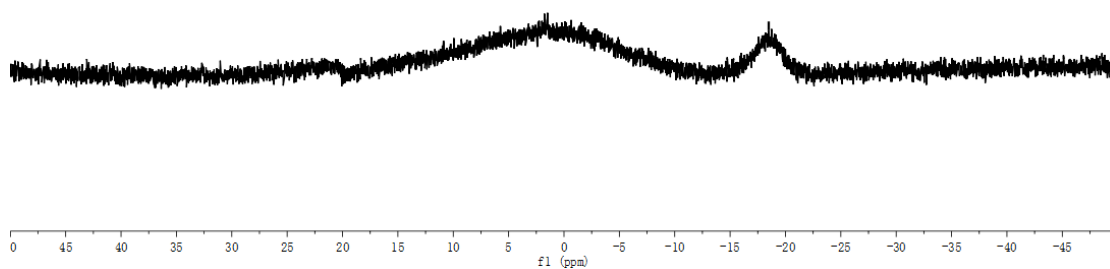

**Figure S101.**  $^{11}\text{B}$  NMR spectrum of **2s** (400 MHz, DMSO)

2021-11  
124-dmsor-h(b)

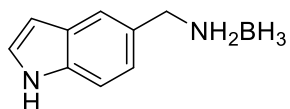

18.55

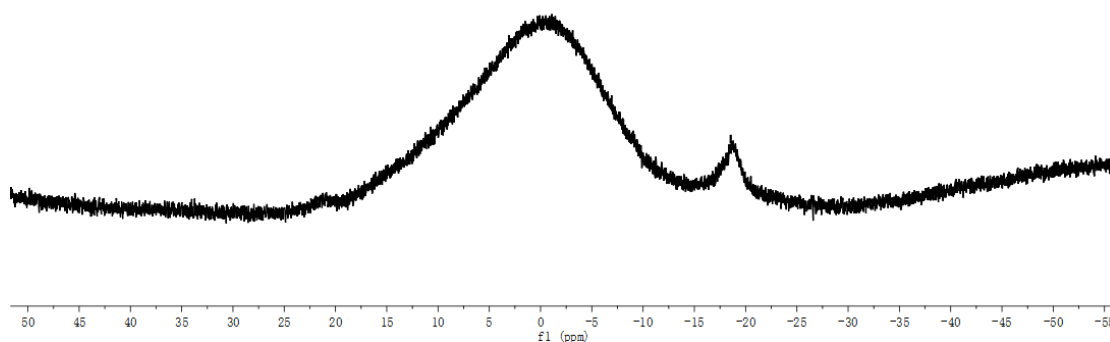

**Figure S102.**  $^{11}\text{B}\{\text{H}\}$  NMR spectrum of **2s** (400 MHz, DMSO)

2021-11  
124-dms-c

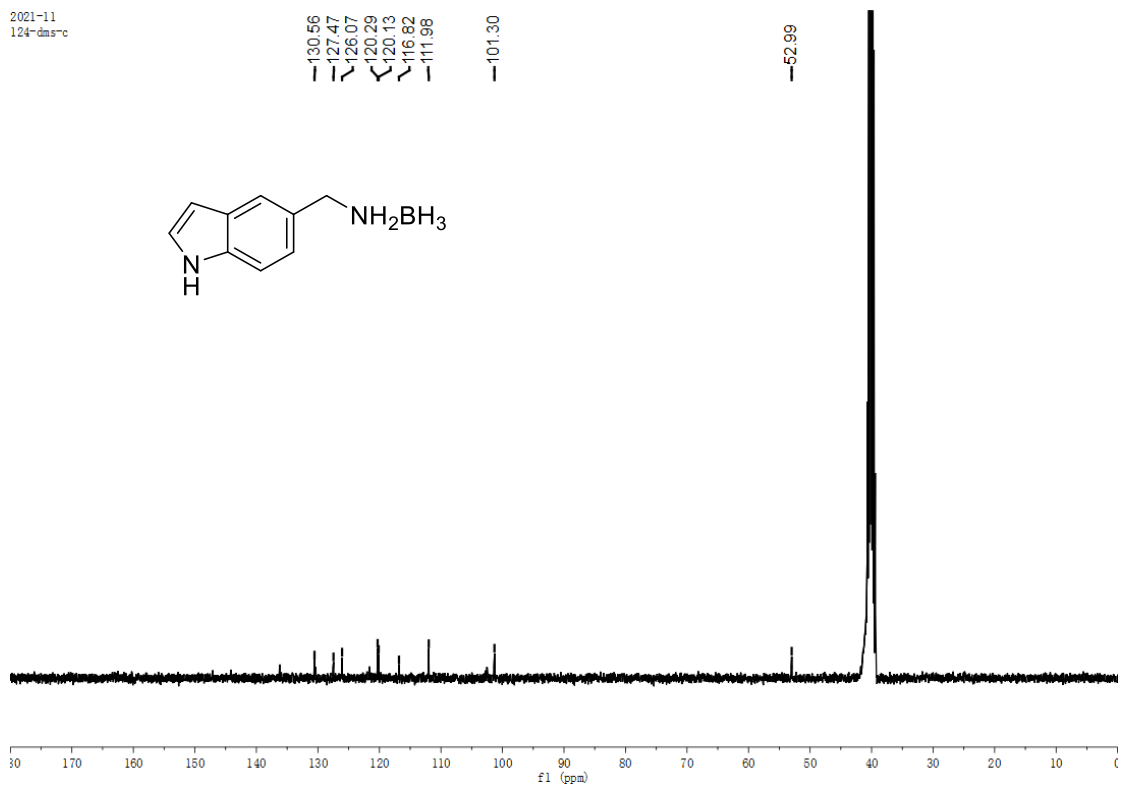

**Figure S103.**  $^{13}\text{C}$  NMR spectrum of **2r** (400 MHz, DMSO)

205-h

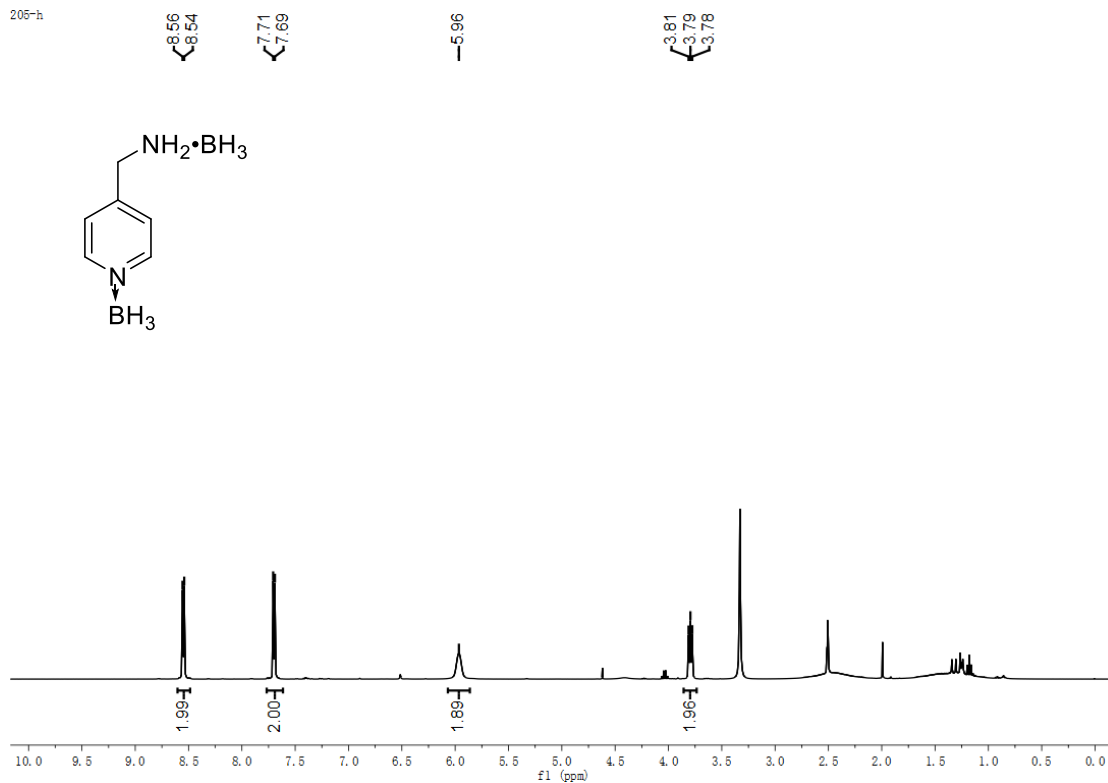

**Figure S104.**  $^1\text{H}$  NMR spectrum of **2t** (400 MHz, DMSO)

205 h(b)

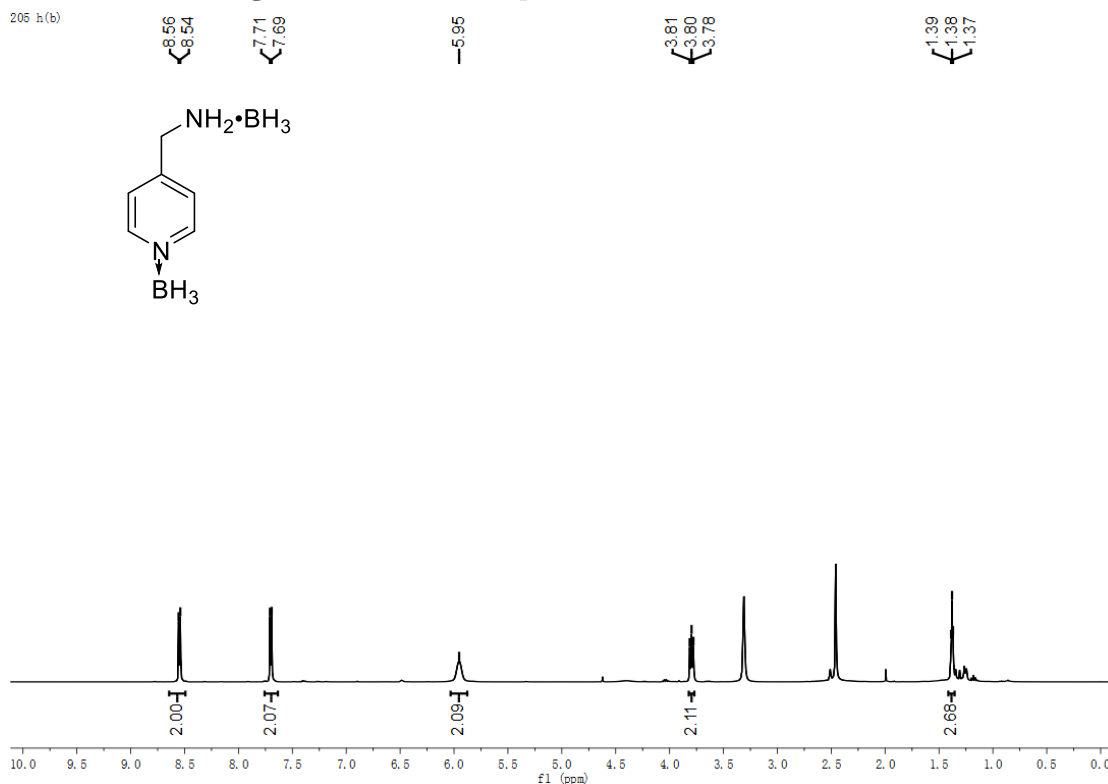

**Figure S105.**  $^1\text{H}\{\text{B}\}$  NMR spectrum of **2t** (400 MHz, DMSO)

205-b

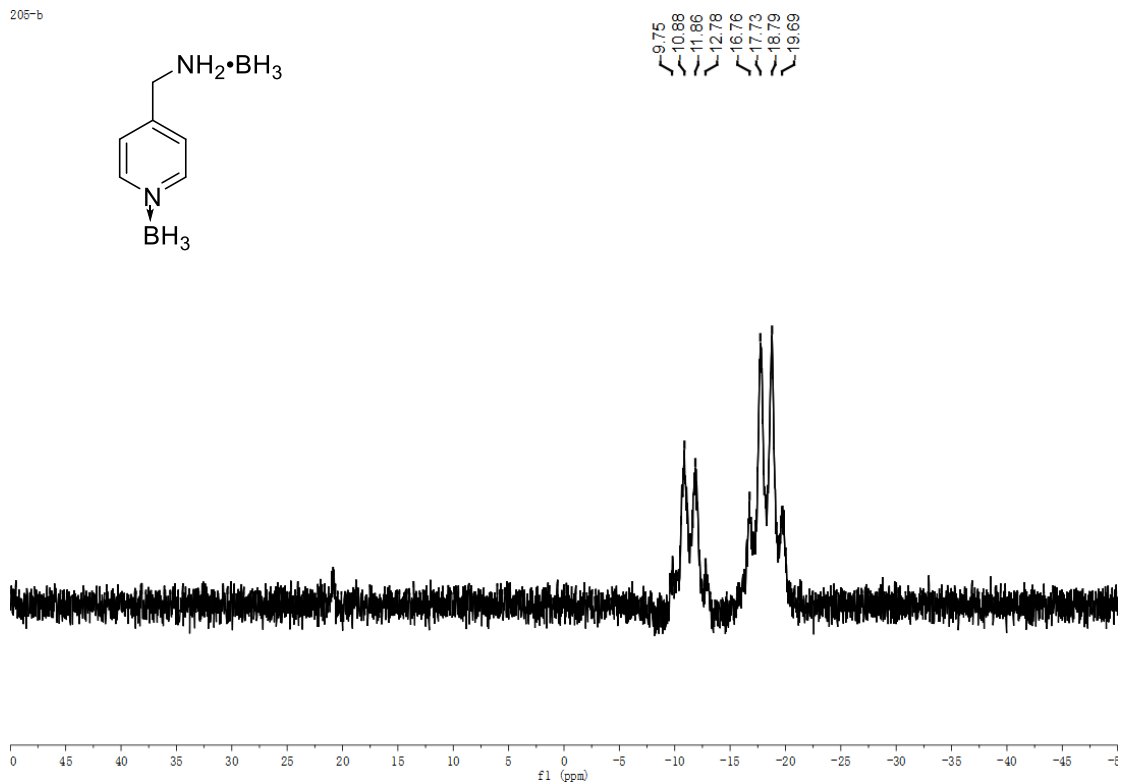

b (h)

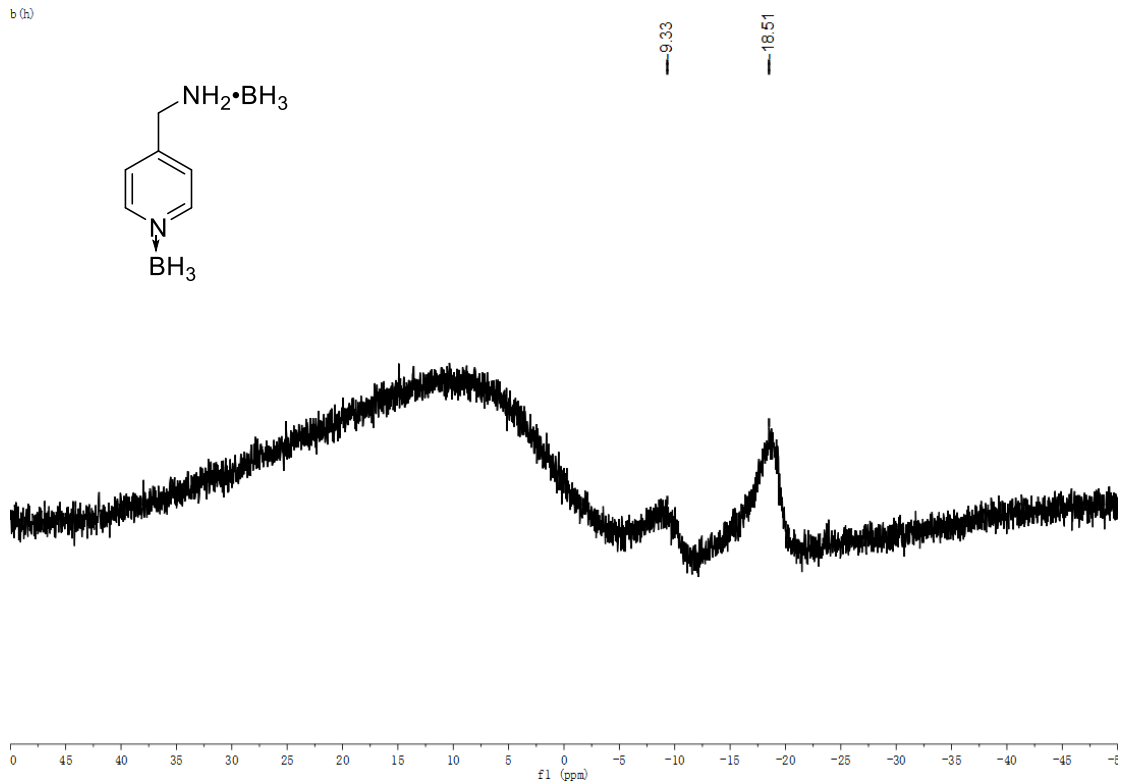

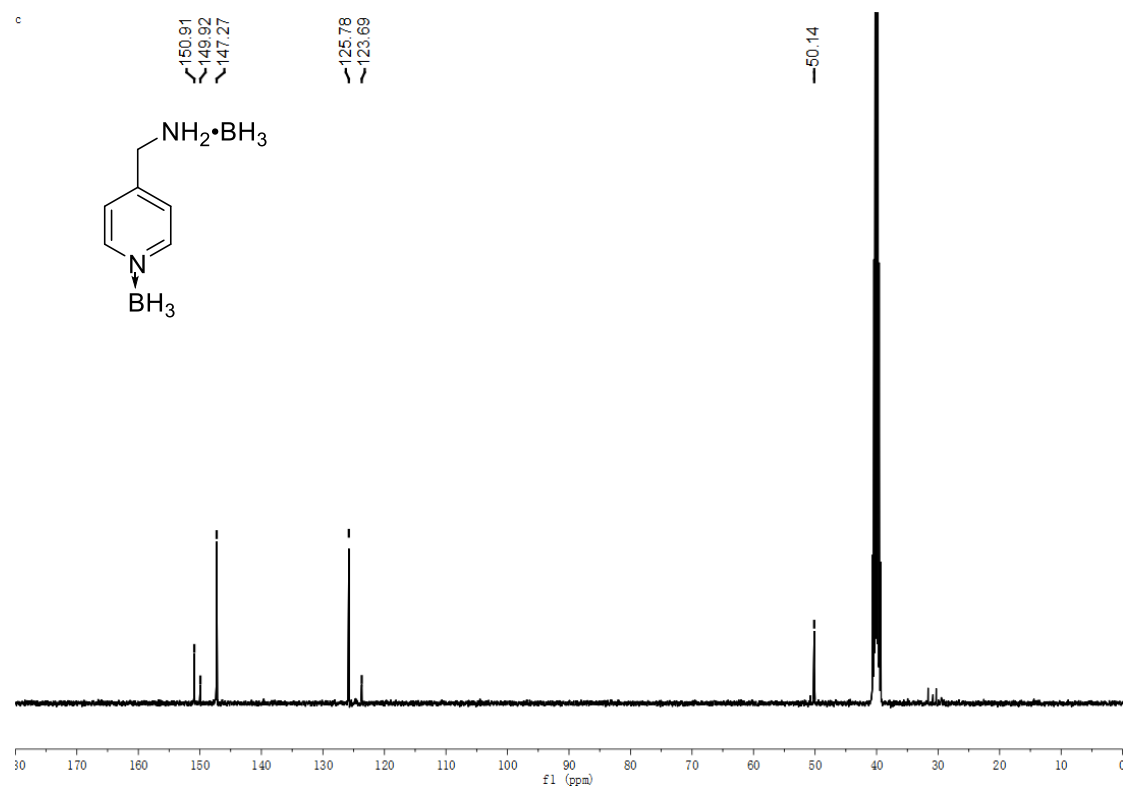

**Figure S108.** <sup>13</sup>C NMR spectrum of **2t** (400 MHz, DMSO)

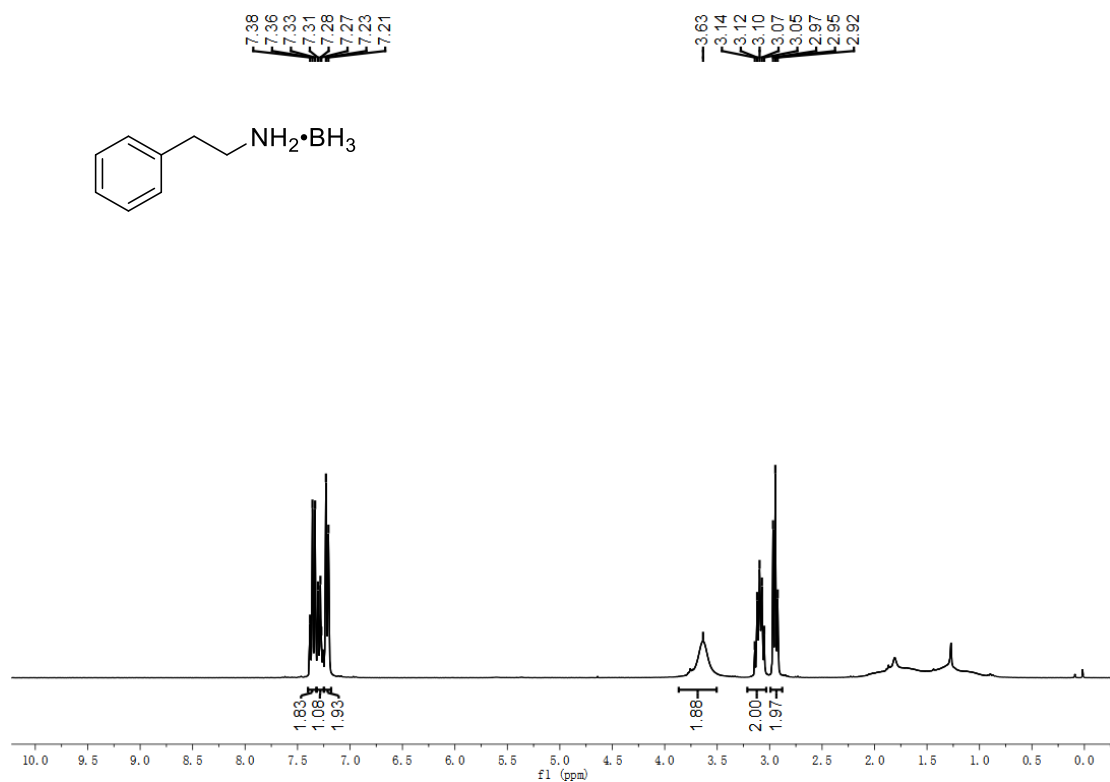

**Figure 109.**  $^1\text{H}$  NMR spectrum of **2u** (300 MHz, DMSO)

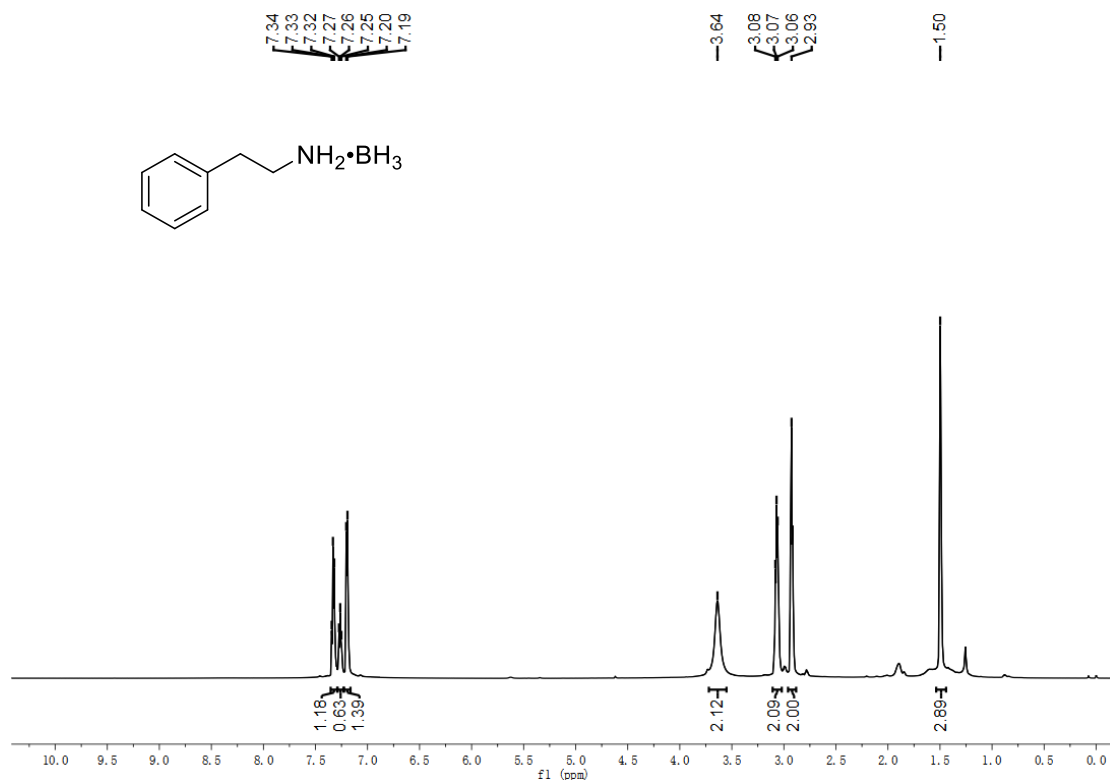

**Figure S110.**  $^1\text{H}\{\text{B}\}$  NMR spectrum of **2u** (600 MHz, DMSO)



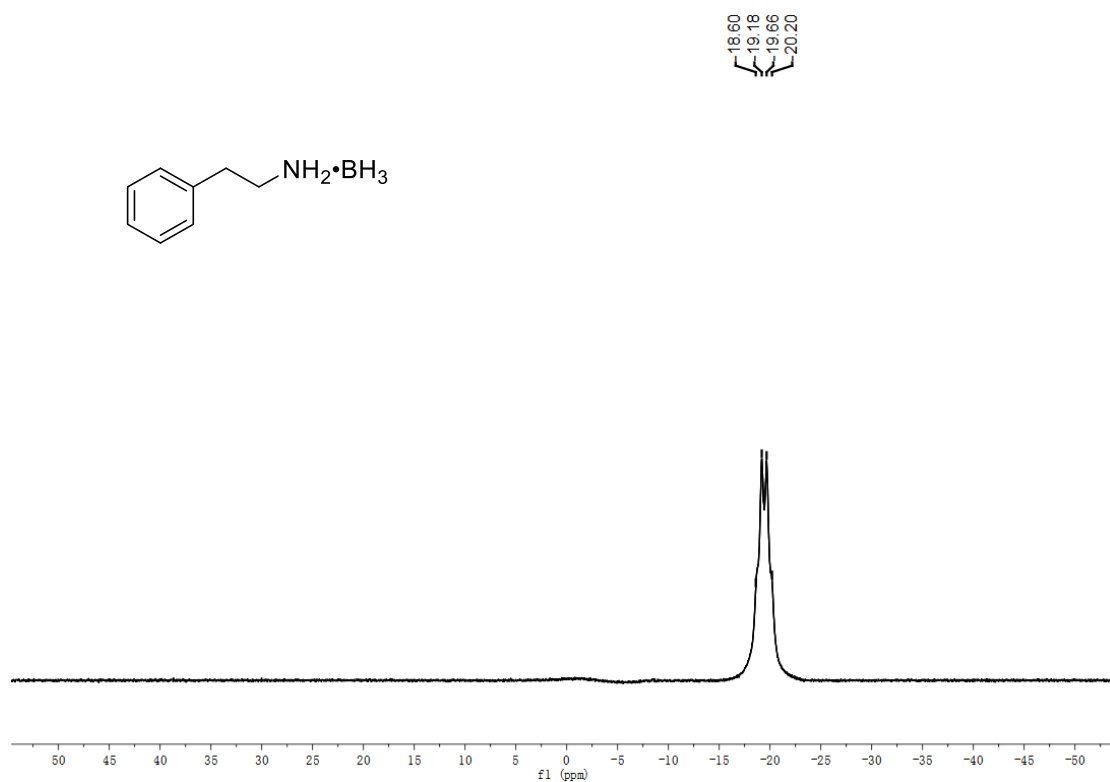

**Figure S111.**  $^{11}\text{B}$  NMR spectrum of **2u** (600 MHz, DMSO)

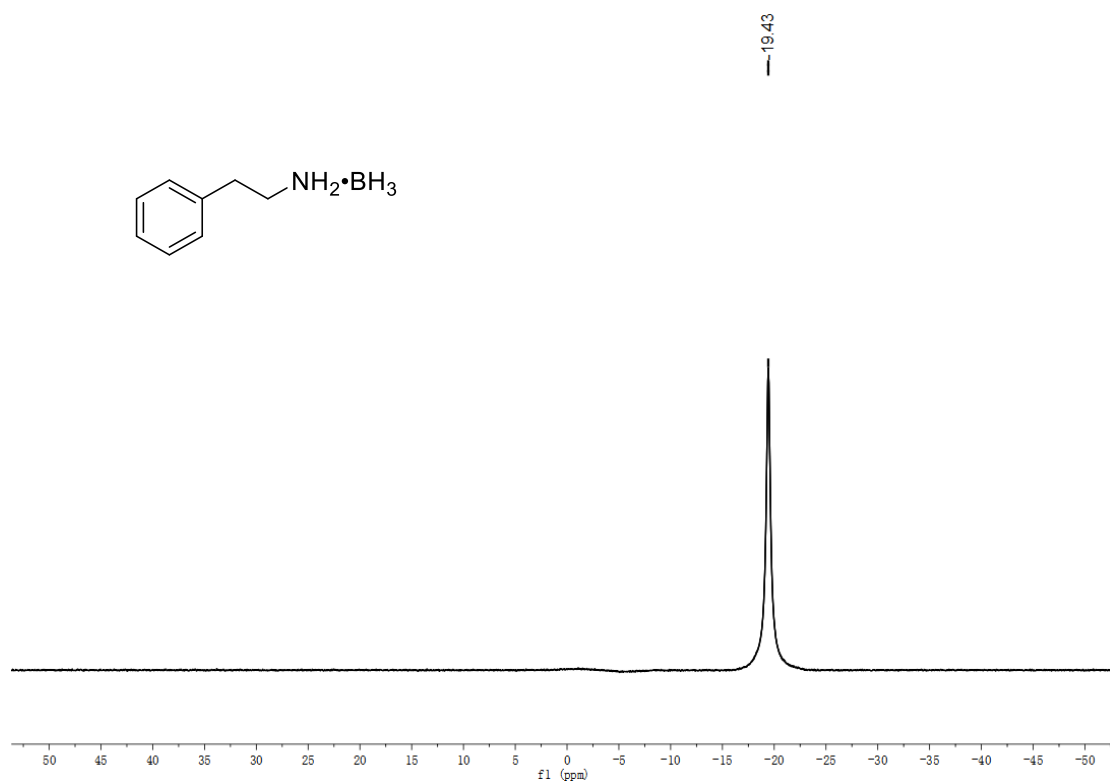

**Figure S112.**  $^{11}\text{B}\{^1\text{H}\}$  NMR spectrum of **2u** (600 MHz, DMSO)

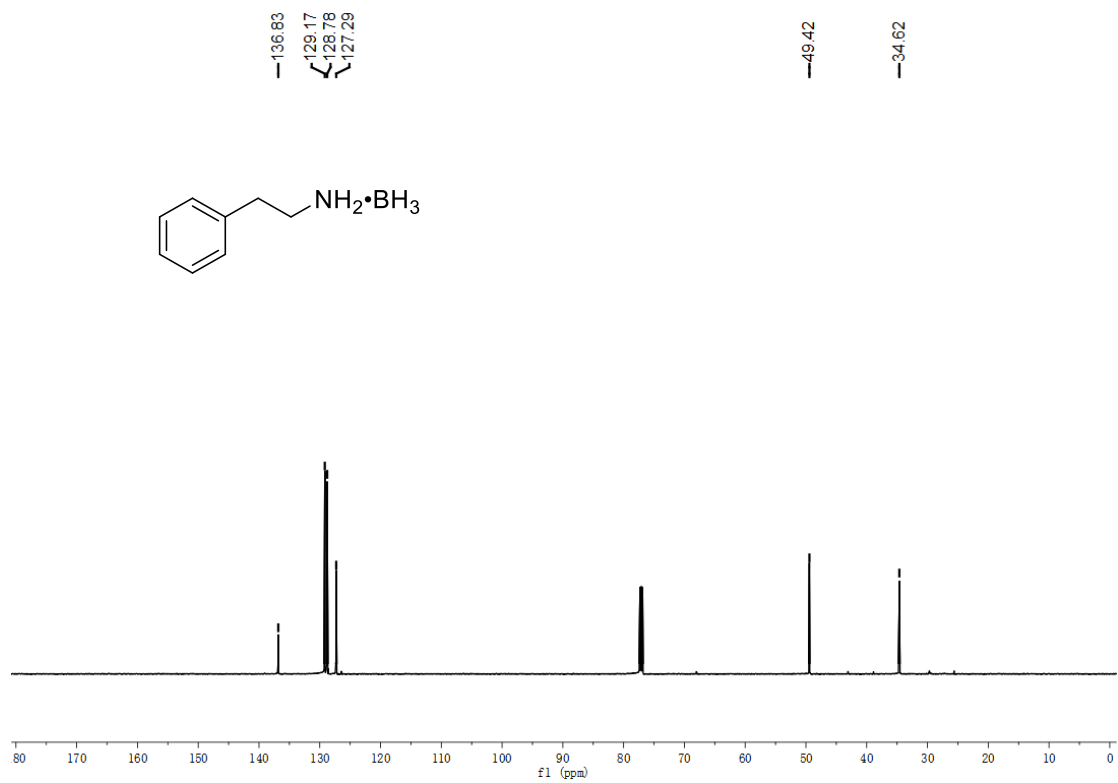

**Figure S113.**  $^{13}\text{C}$  NMR spectrum of **2u** (600 MHz, DMSO)

2021-9  
138-H  
DMSO

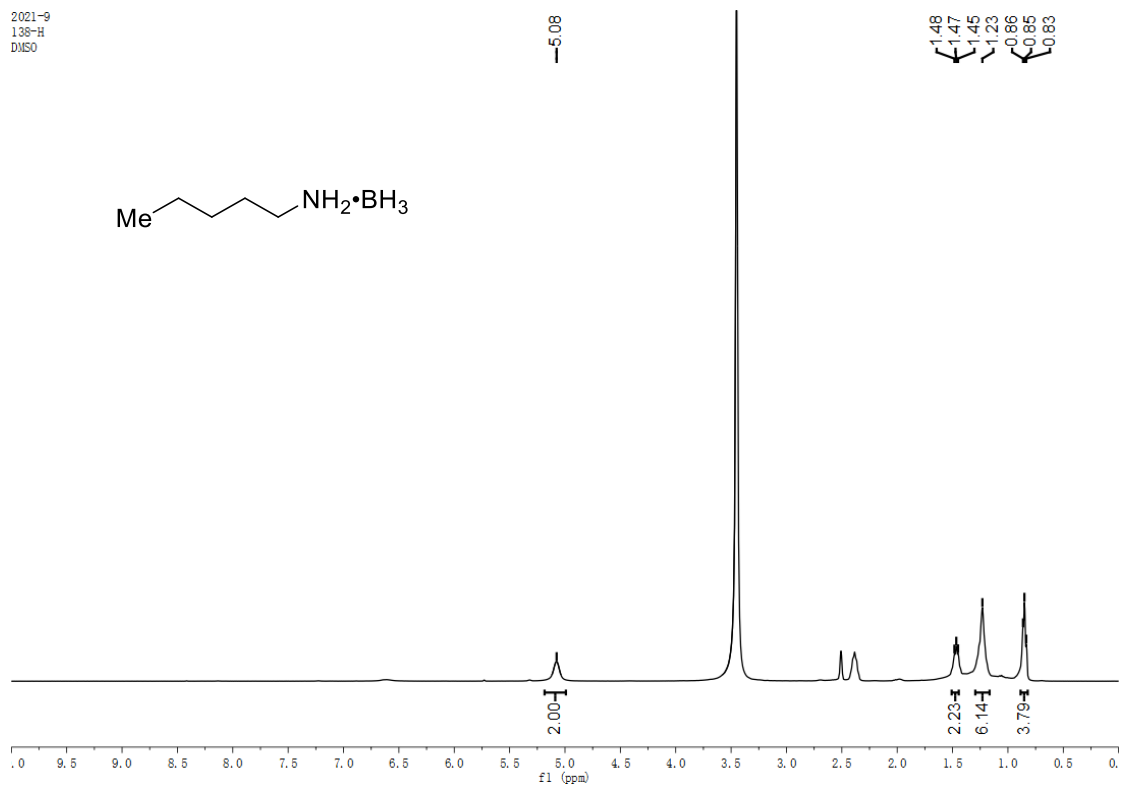

**Figure S114.**  $^1\text{H}$  NMR spectrum of **2v** (400 MHz, DMSO)

2021-9  
138-H(B0)  
DMSO

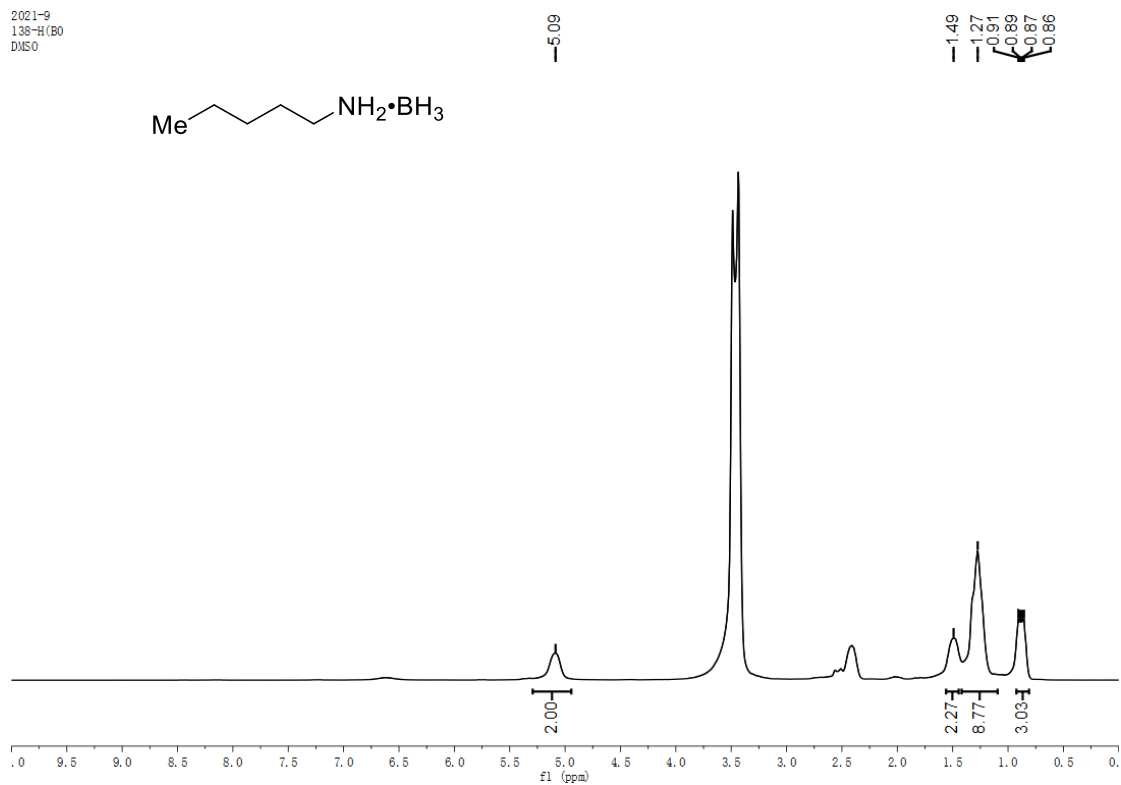

**Figure S115.**  $^1\text{H}\{\text{B}\}$  NMR spectrum of **2v** (400 MHz, DMSO)

2021-9  
138-B  
DMSO

19.21  
19.79

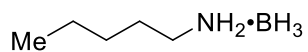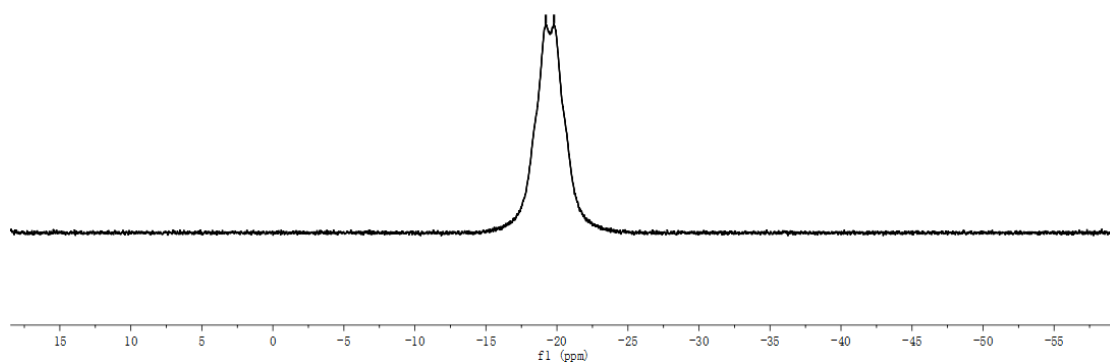

**Figure S116.**  $^{11}\text{B}$  NMR spectrum of **2v** (400 MHz, DMSO)

=

2021-9  
138-B(H)  
DMSO

19.52

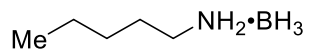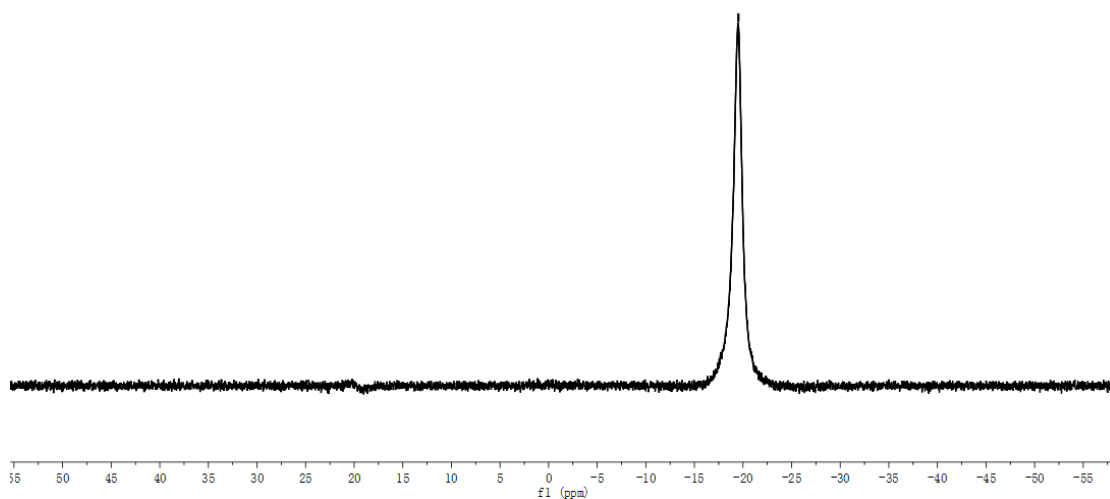

**Figure S117.**  $^{11}\text{B}\{\text{H}\}$  NMR spectrum of **2v** (400 MHz, DMSO)

2021-9  
138-C  
DMSO

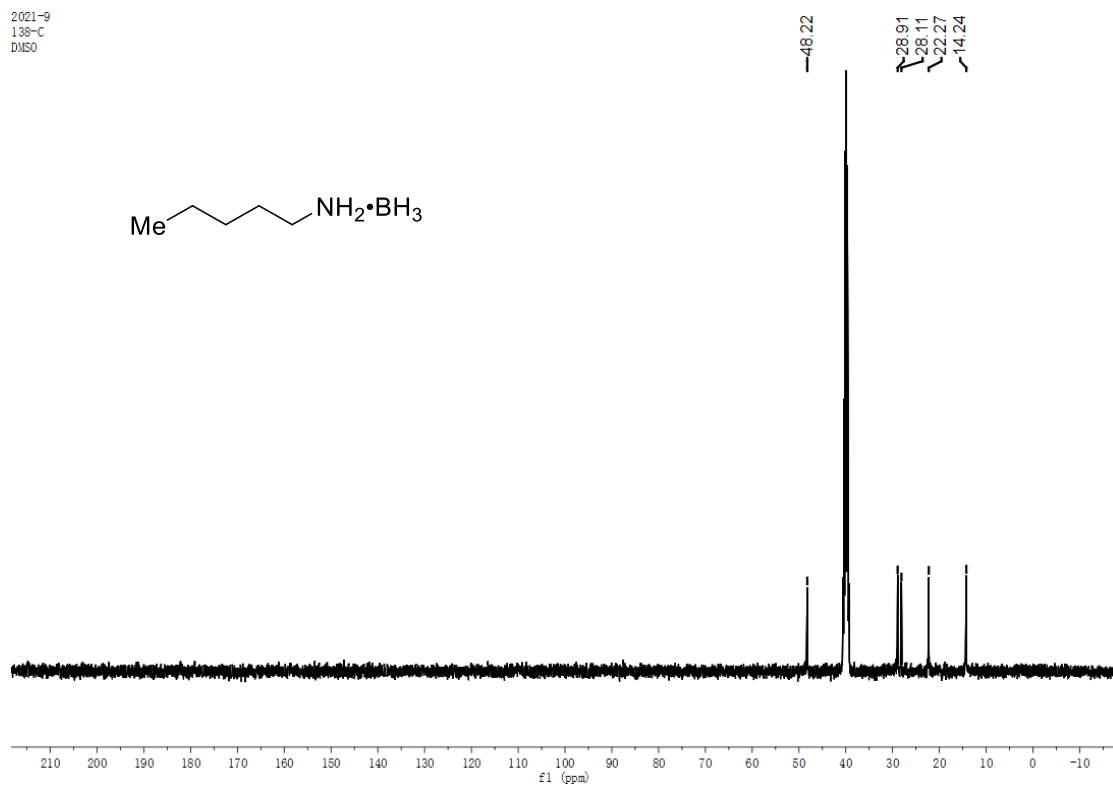

**Figure S118.** <sup>13</sup>C NMR spectrum of 2v (400 MHz, DMSO)

2021-9  
136-H  
DMSO

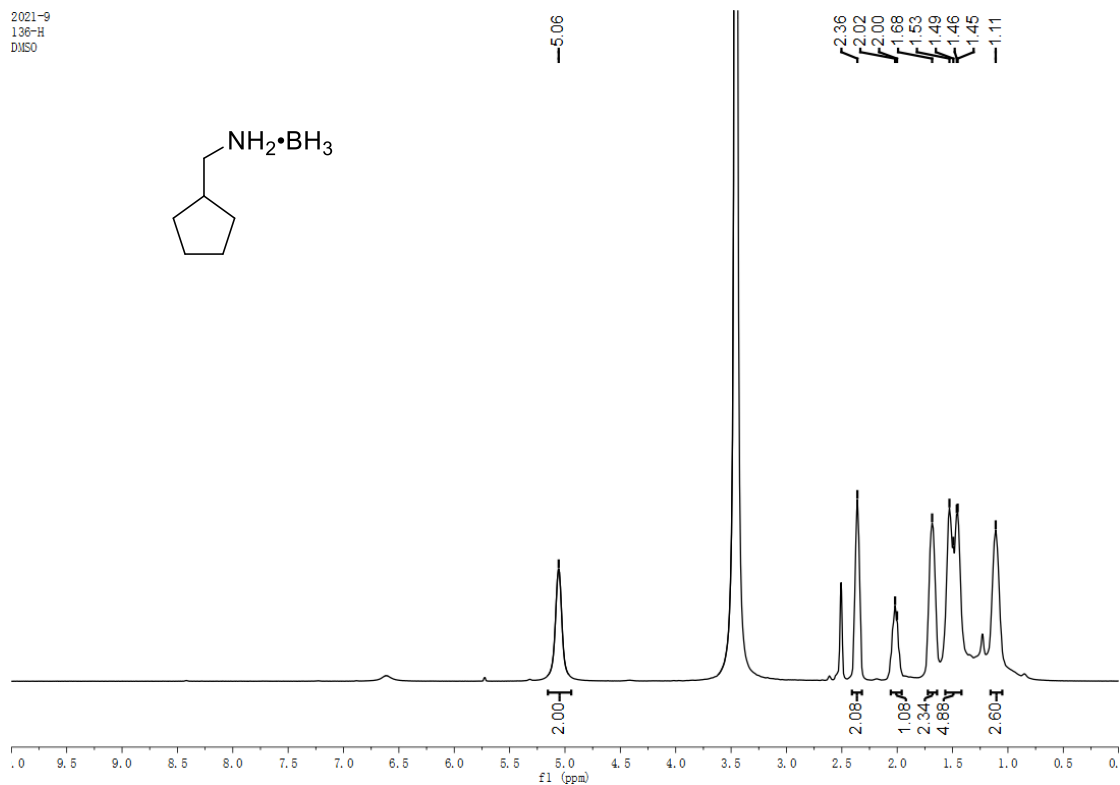

**Figure S119.**  $^1\text{H}$  NMR spectrum of **2w** (400 MHz, DMSO)

2021-9  
136-H(B0  
DMSO

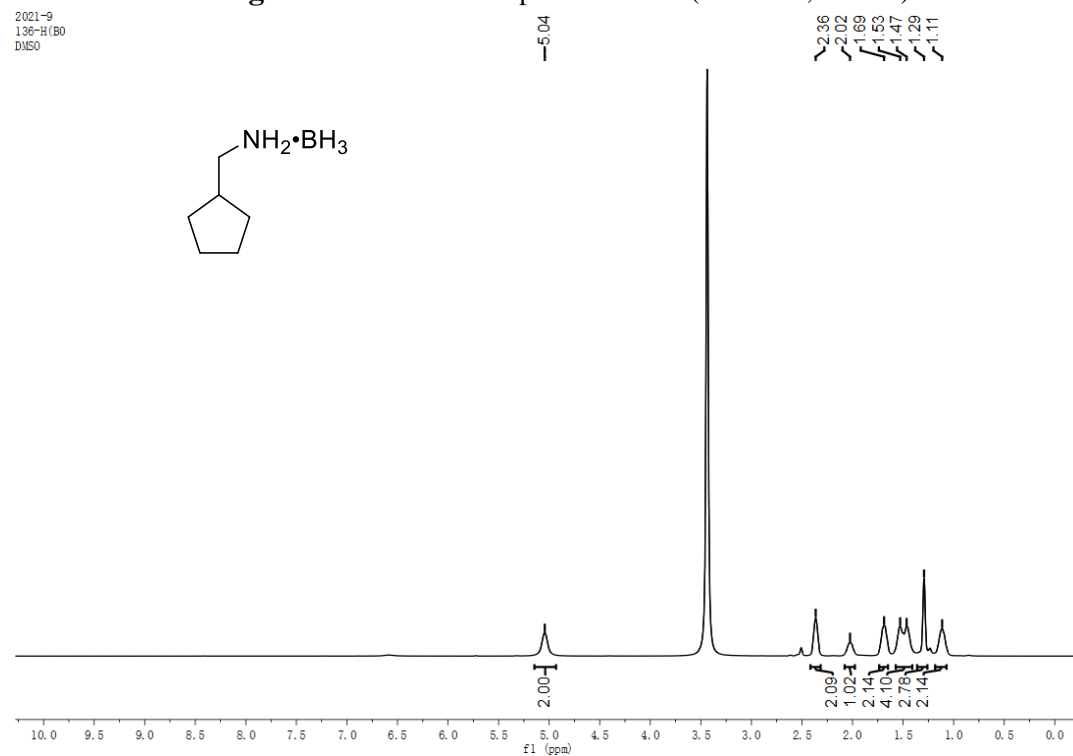

**Figure S120.**  $^1\text{H}\{\text{B}\}$  NMR spectrum of **2w** (400 MHz, DMSO)

2021-9  
136-B  
DMSO

18.93  
19.49

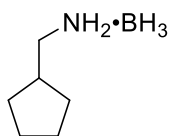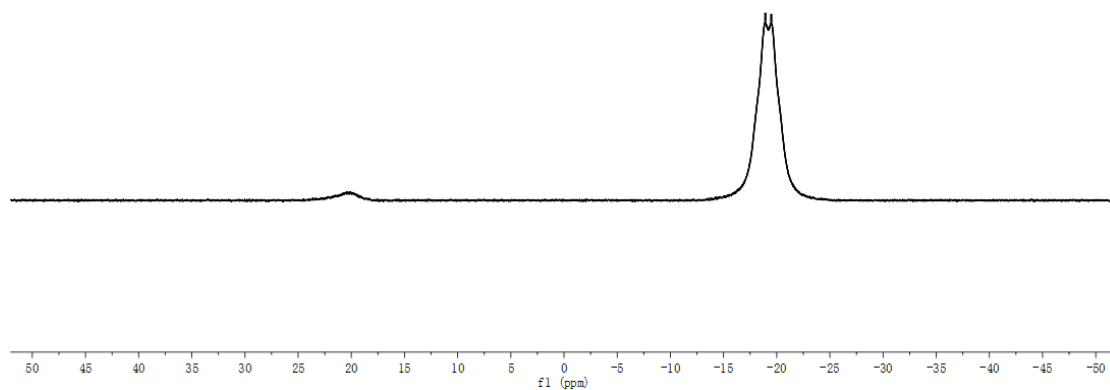

**Figure S121.**  $^{11}\text{B}$  NMR spectrum of **2w** (400 MHz, DMSO)

2021-9  
136-B (H)  
DMSO

19.20

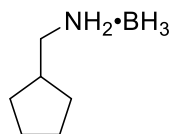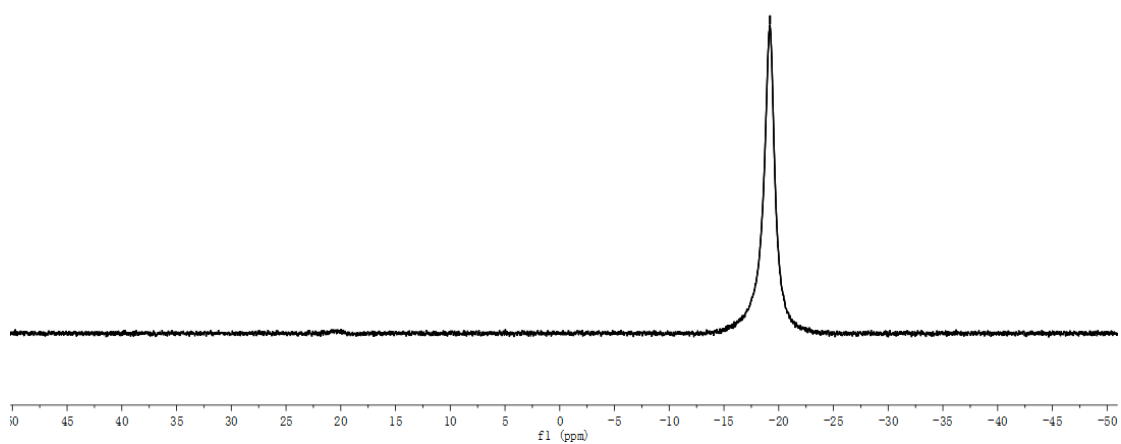

**Figure S122.**  $^{11}\text{B}\{^1\text{H}\}$  NMR spectrum of **2w** (400 MHz, DMSO)

2021-9  
136-C  
DMSO

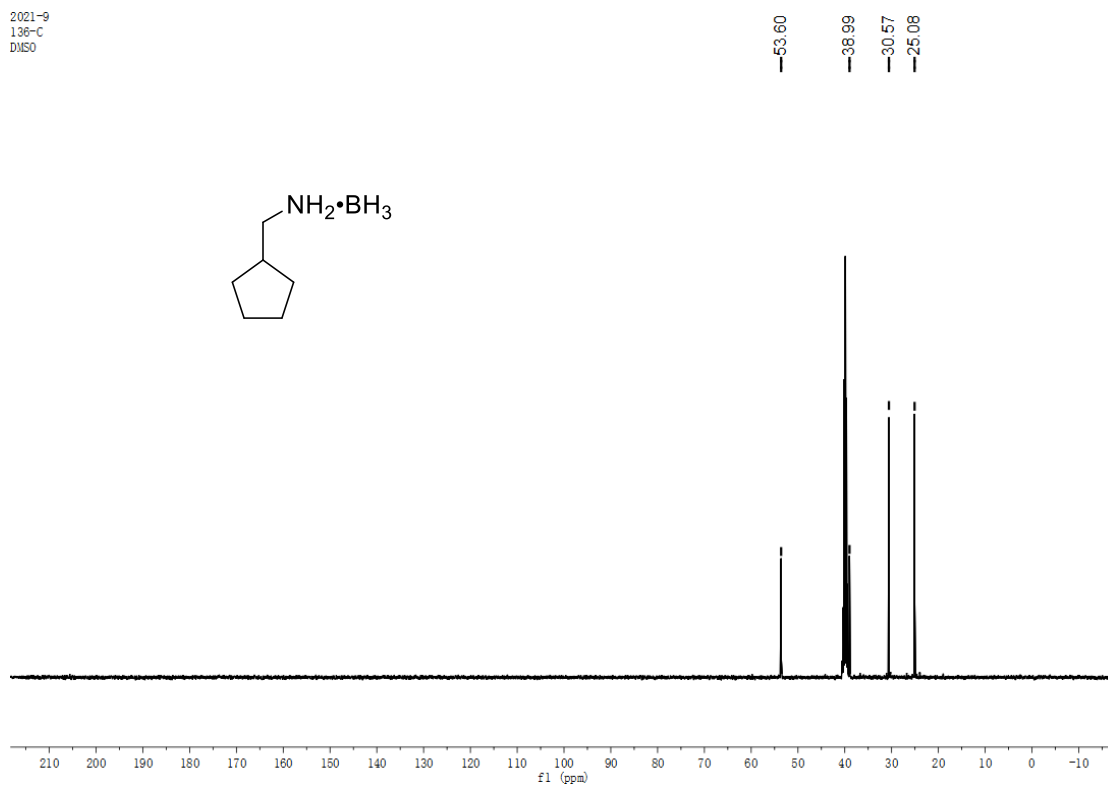

**Figure S123.**  $^{13}\text{C}$  NMR spectrum of **2w** (400 MHz, DMSO)



2021-9  
137-H  
DMSO

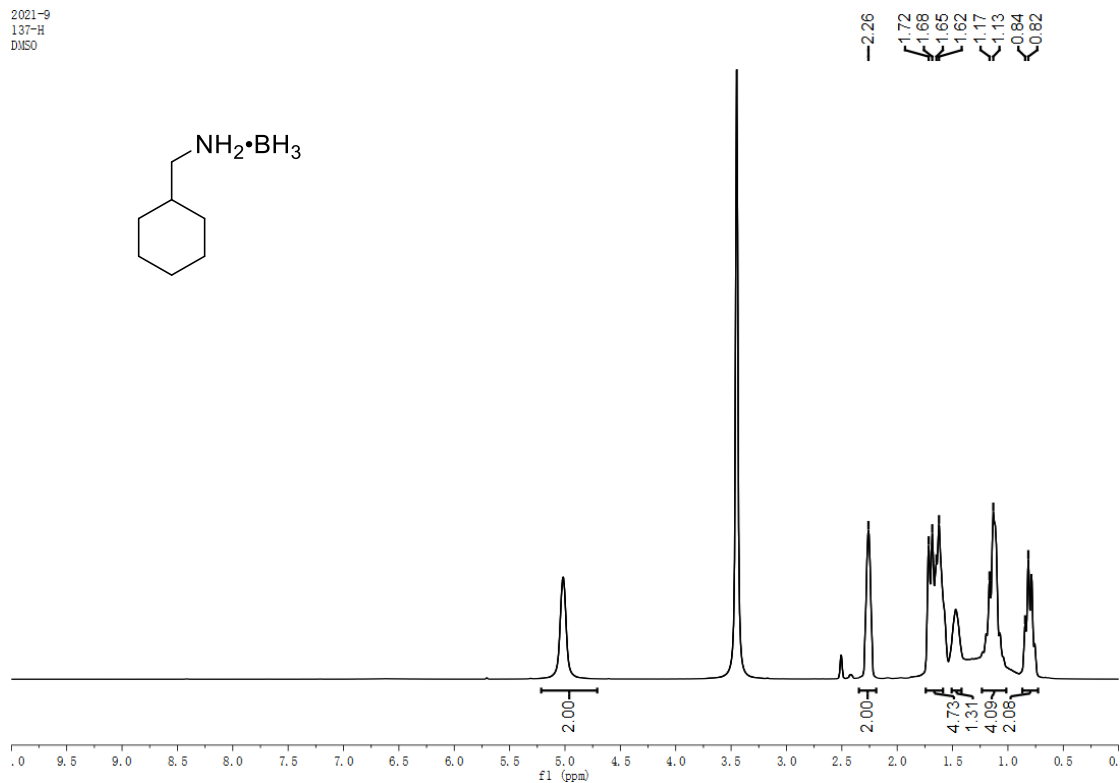

**Figure S124.** <sup>1</sup>H NMR spectrum of **2x** (400 MHz, DMSO)

2021-9  
137-H(B0)  
DMSO

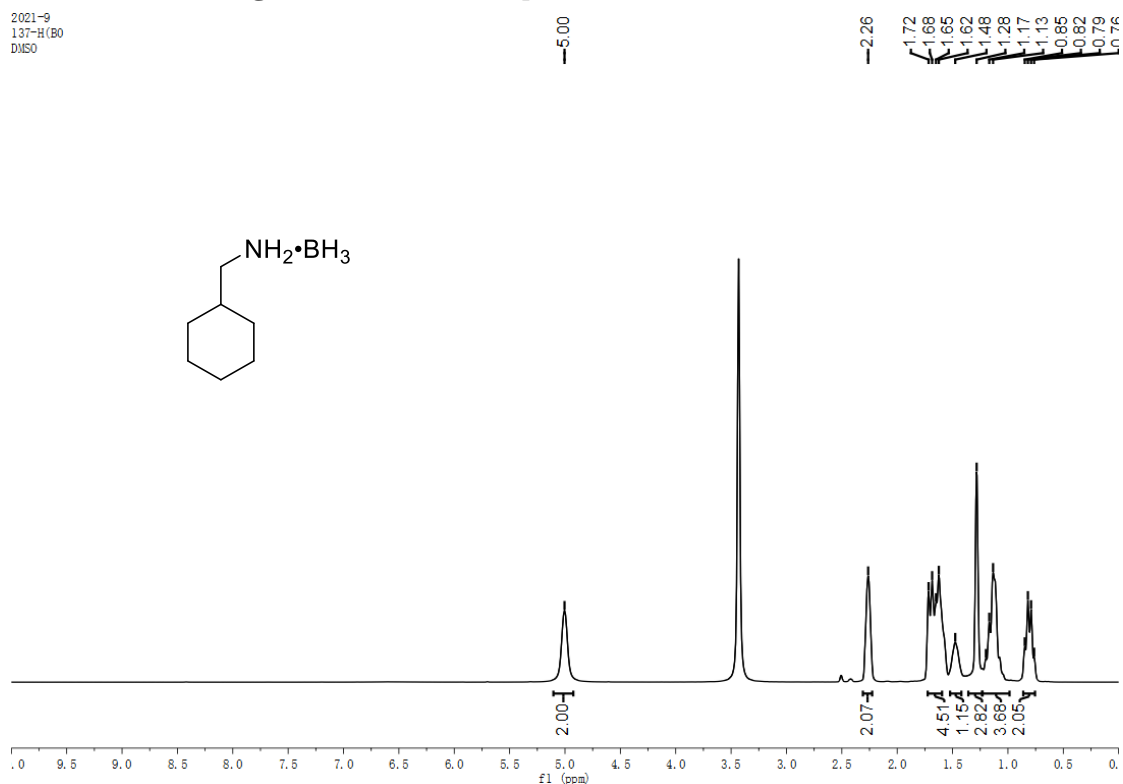

**Figure S125.** <sup>1</sup>H{B} NMR spectrum of **2x** (400 MHz, DMSO)

2021-9  
137-B  
DMSO

19.19

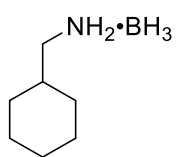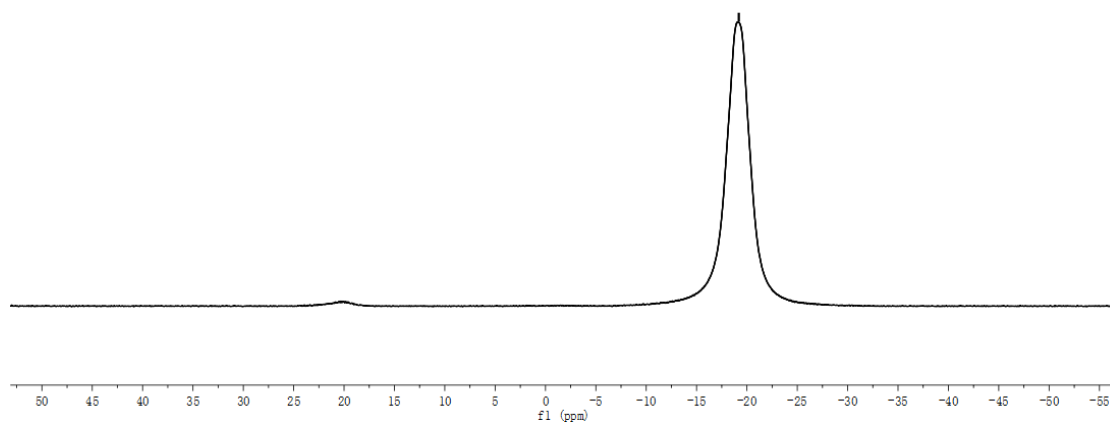

**Figure S126.**  $^{11}\text{B}$  NMR spectrum of **2x** (400 MHz, DMSO)

2021-9  
137-B (H)  
DMSO

19.13

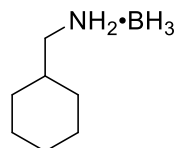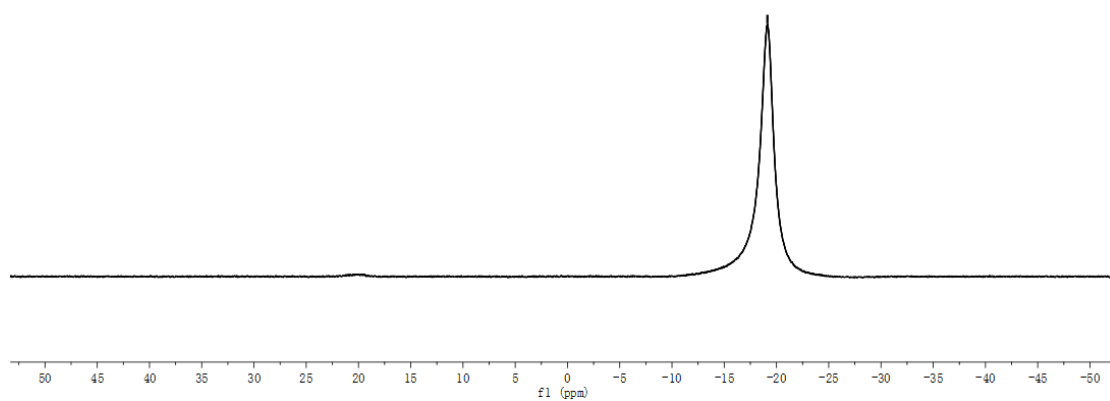

**Figure S127.**  $^{11}\text{B}\{^1\text{H}\}$  NMR spectrum of **2x** (400 MHz, DMSO)

2021-9  
137-C  
DMSO

54.90

36.70  
30.77  
26.35  
25.78

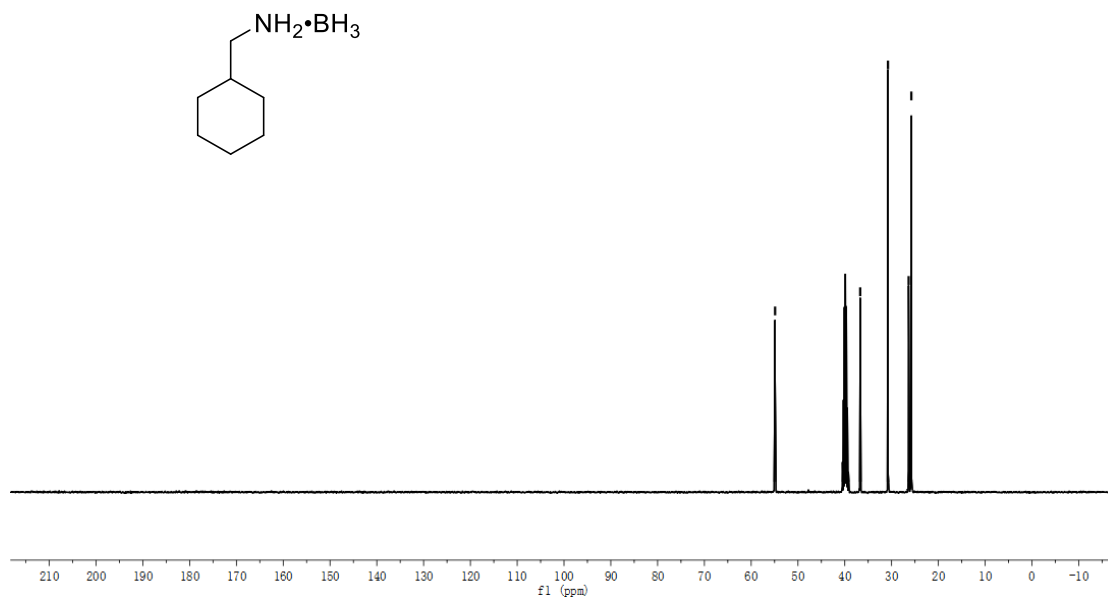

**Figure S128.** <sup>13</sup>C NMR spectrum of **2x** (400 MHz, DMSO)

211  
211-h-dms0

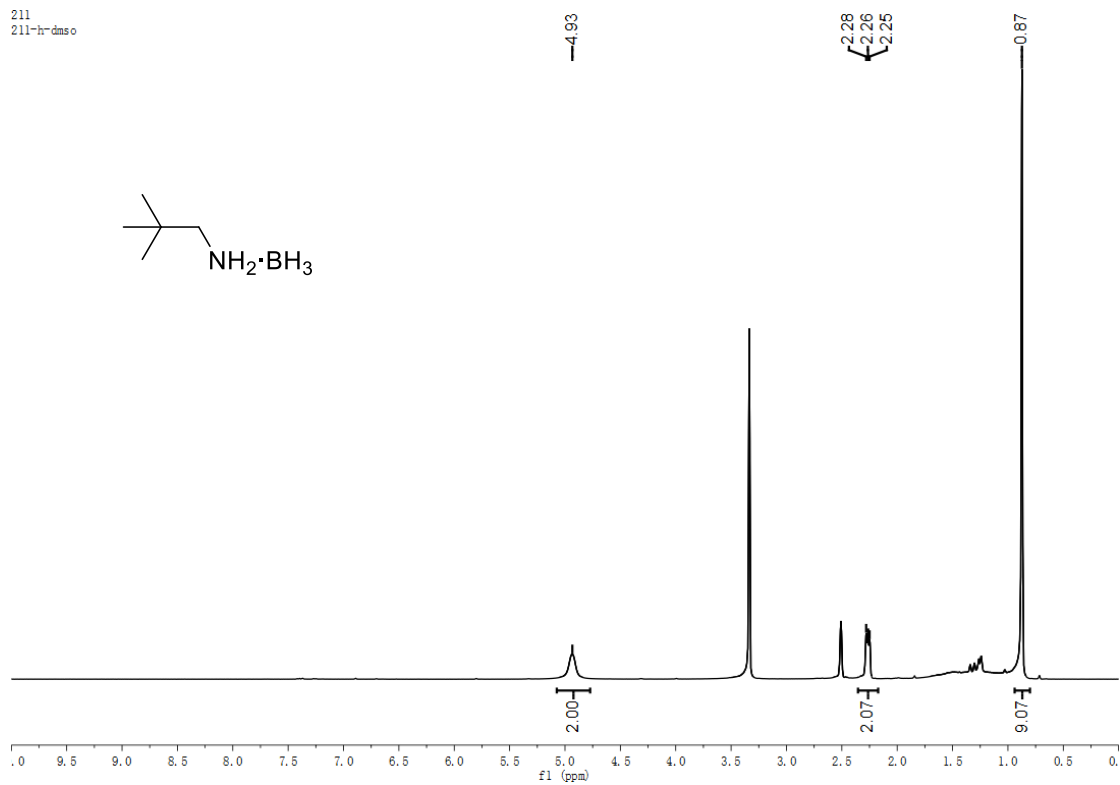

**Figure S129.** <sup>1</sup>H NMR spectrum of **2y** (400 MHz, DMSO)

211  
211-h(b)-dms0

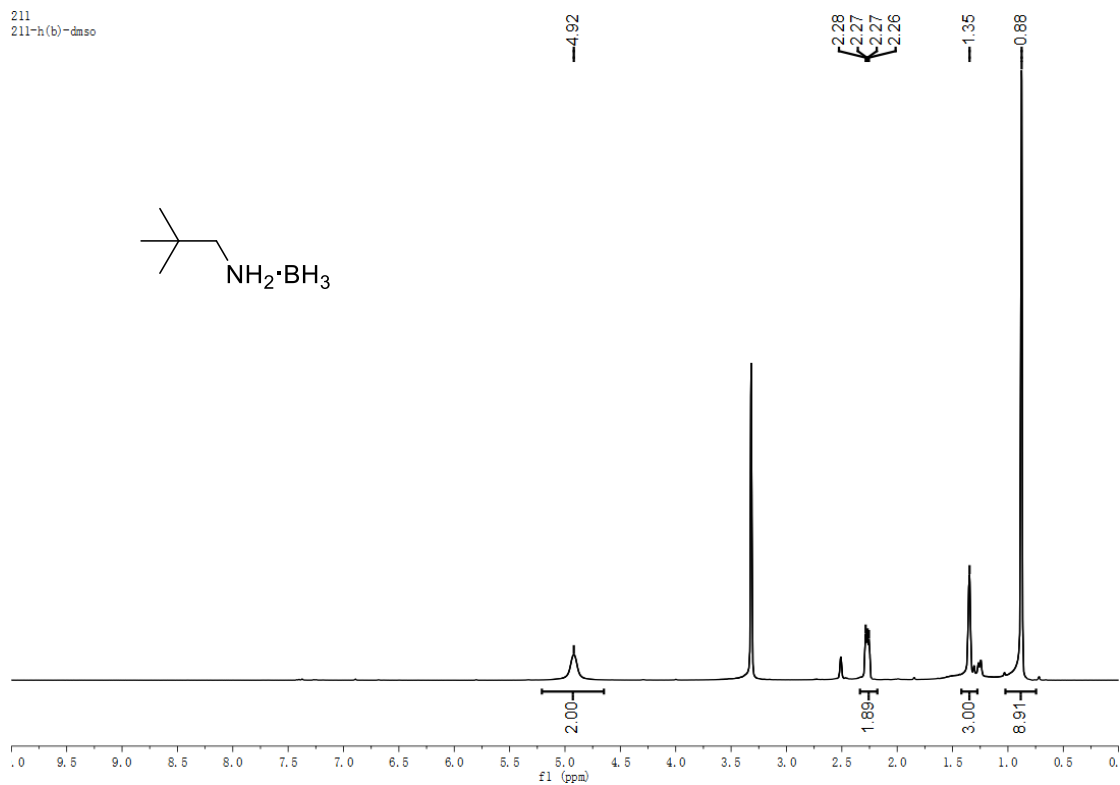

**Figure S130.** <sup>1</sup>H{B} NMR spectrum of **2y** (400 MHz, DMSO)

20211109-剩余图谱  
211-b-dms0

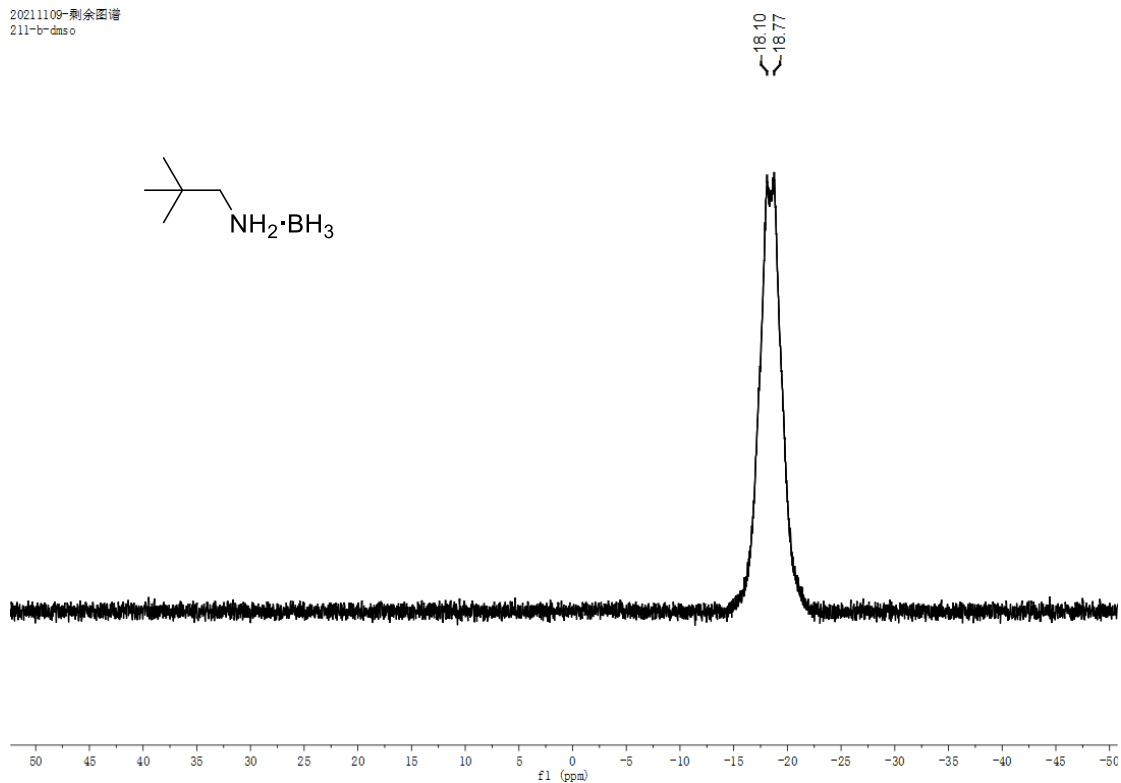

**Figure S131.**  $^{11}\text{B}$  NMR spectrum of 2y (400 MHz, DMSO)

20211109-剩余图谱  
211-b(h)-dms0

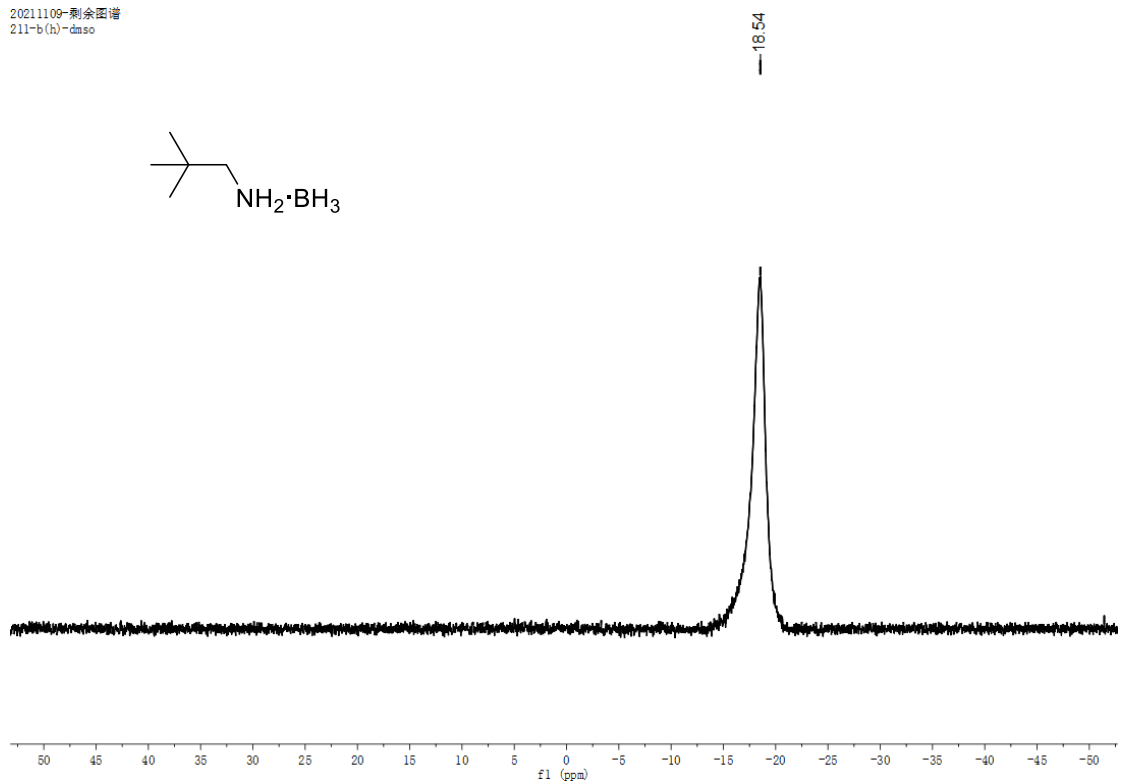

**Figure S132.**  $^{11}\text{B}\{\text{H}\}$  NMR spectrum of 2y (400 MHz, DMSO)

20211109-剩余图谱  
211-c-dms0

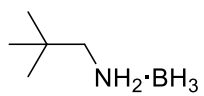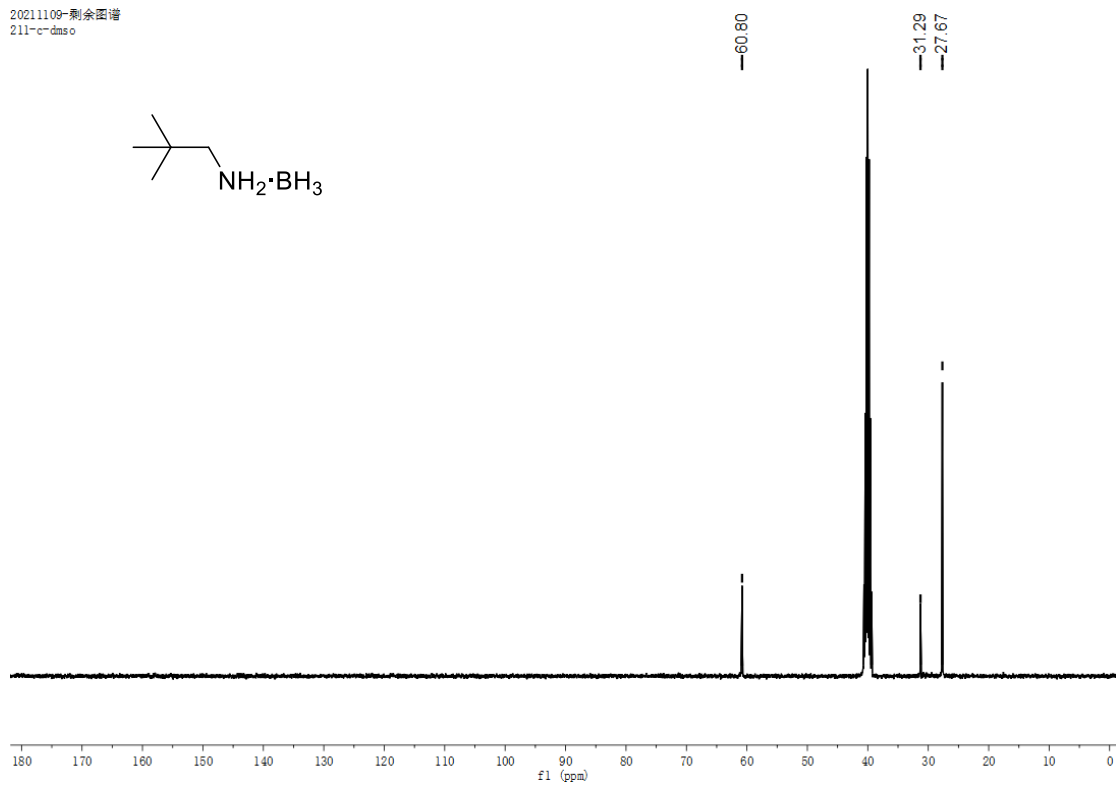

**Figure S133.** <sup>13</sup>C NMR spectrum of 2y (400 MHz, DMSO)

水解  
270-dmso-h-2

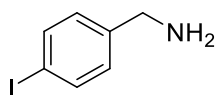

7.65  
7.63  
7.15  
7.13

3.14

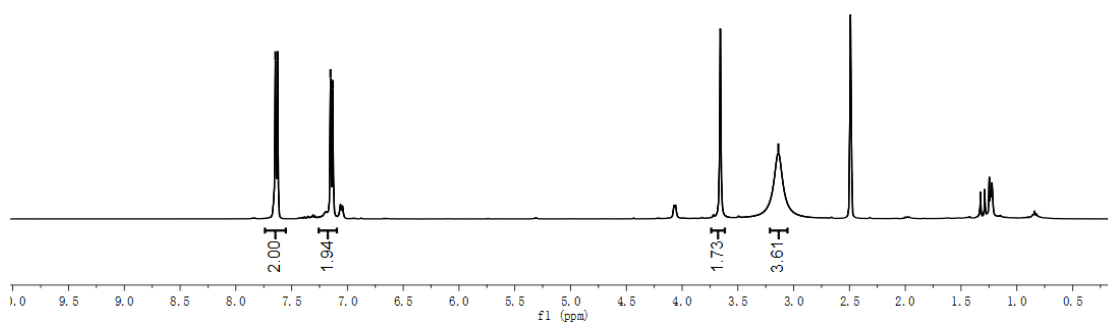

**Figure S134.** <sup>1</sup>H NMR spectrum of **3a** (400 MHz, DMSO)

水解  
270-dmso-c-2

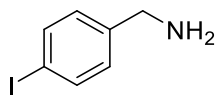

144.26

137.21

130.02

92.16

45.38

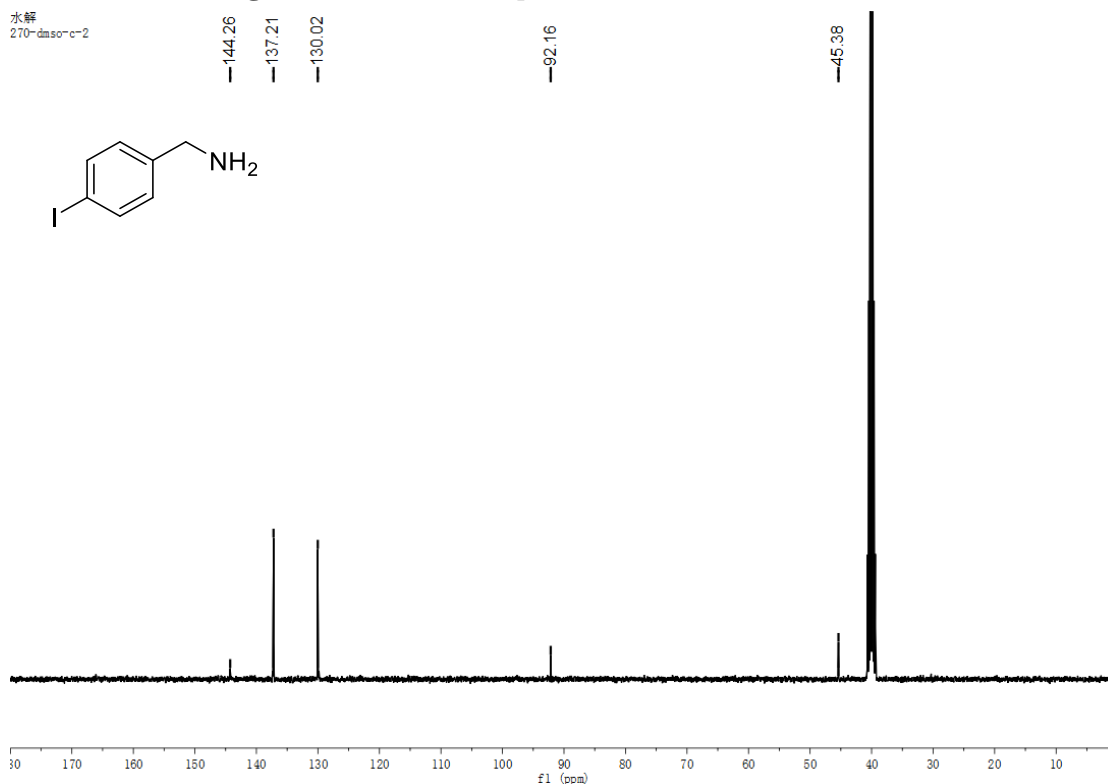

**Figure S135.** <sup>13</sup>C NMR spectrum of **3a** (400 MHz, DMSO)

水解  
271-odcl3-h

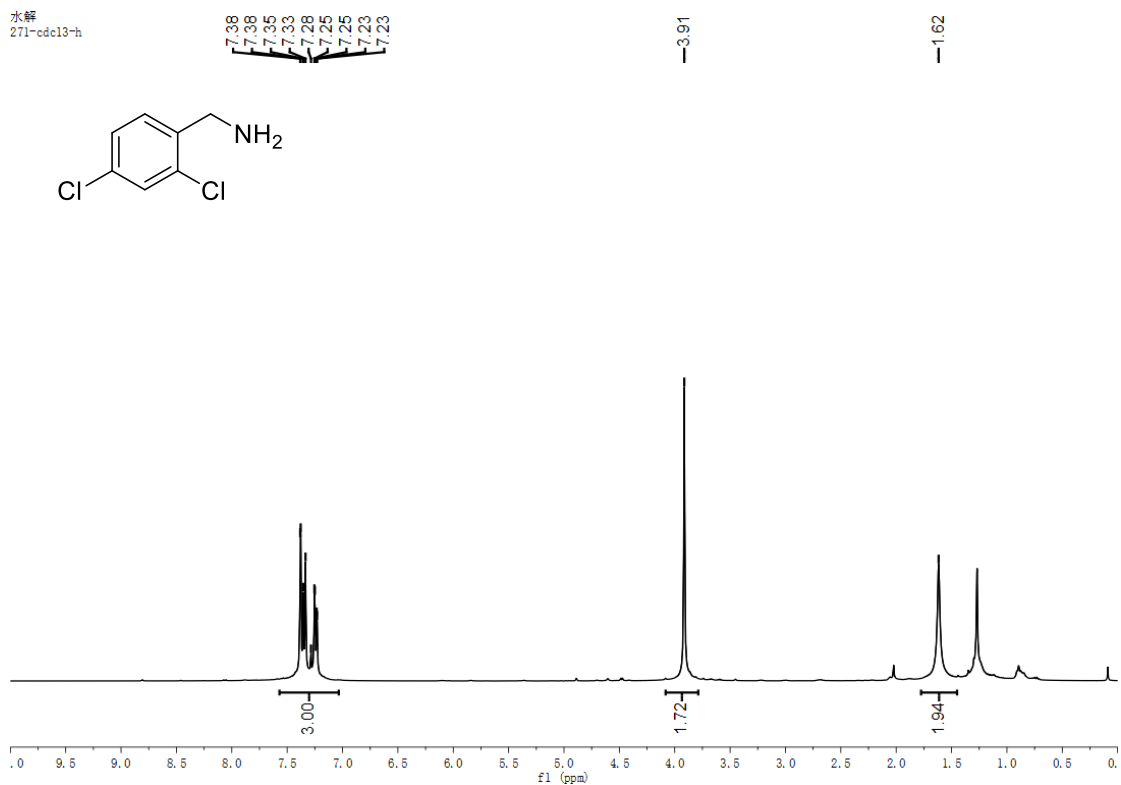

Figure S136. <sup>1</sup>H NMR spectrum of **3b** (400 MHz, CDCl<sub>3</sub>)

水解  
271-odcl3-c

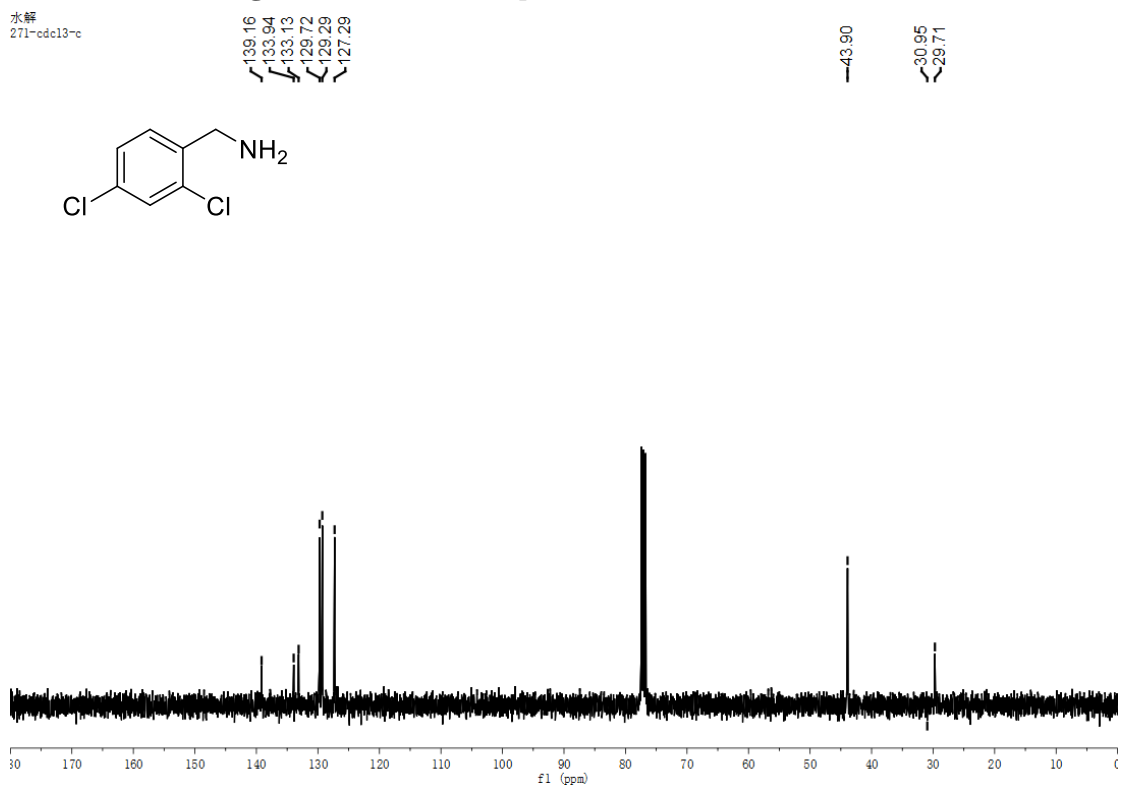

Figure S137. <sup>13</sup>C NMR spectrum of **3b** (400 MHz, CDCl<sub>3</sub>)



2021-11  
172-cdc13-h

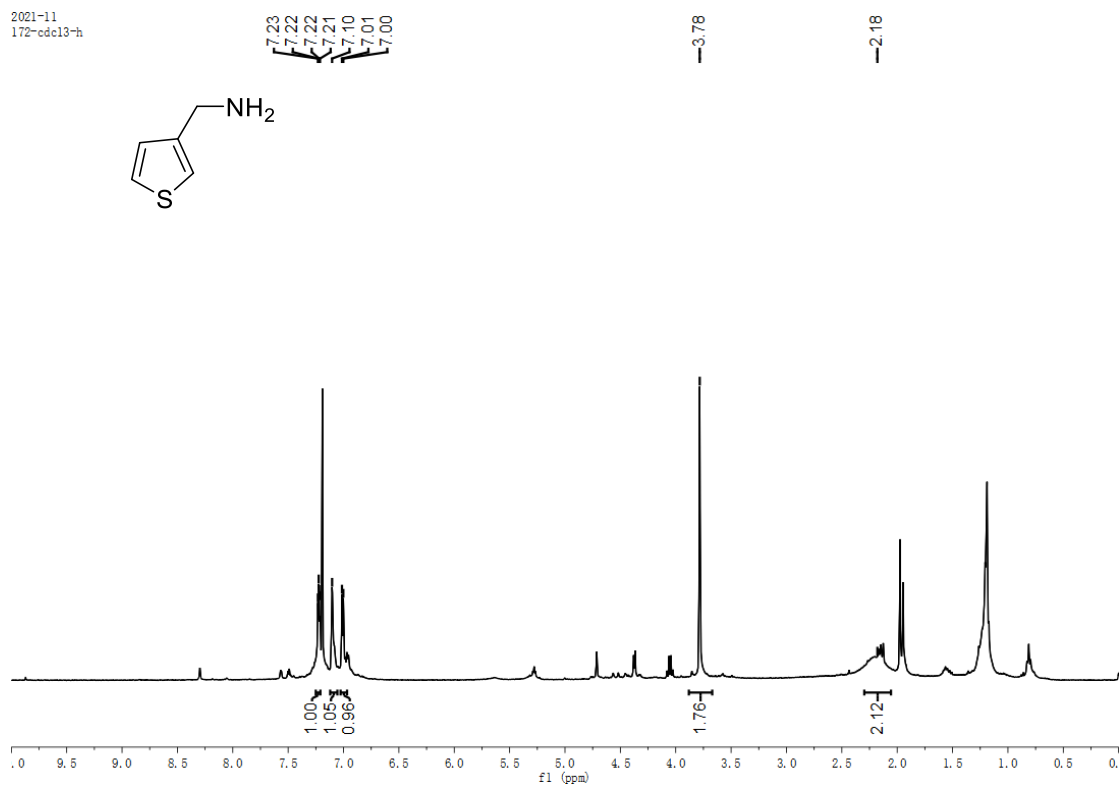

**Figure S138.**  $^1\text{H}$  NMR spectrum of **3c** (400 MHz,  $\text{CDCl}_3$ )

20211116  
172-cdc13-c

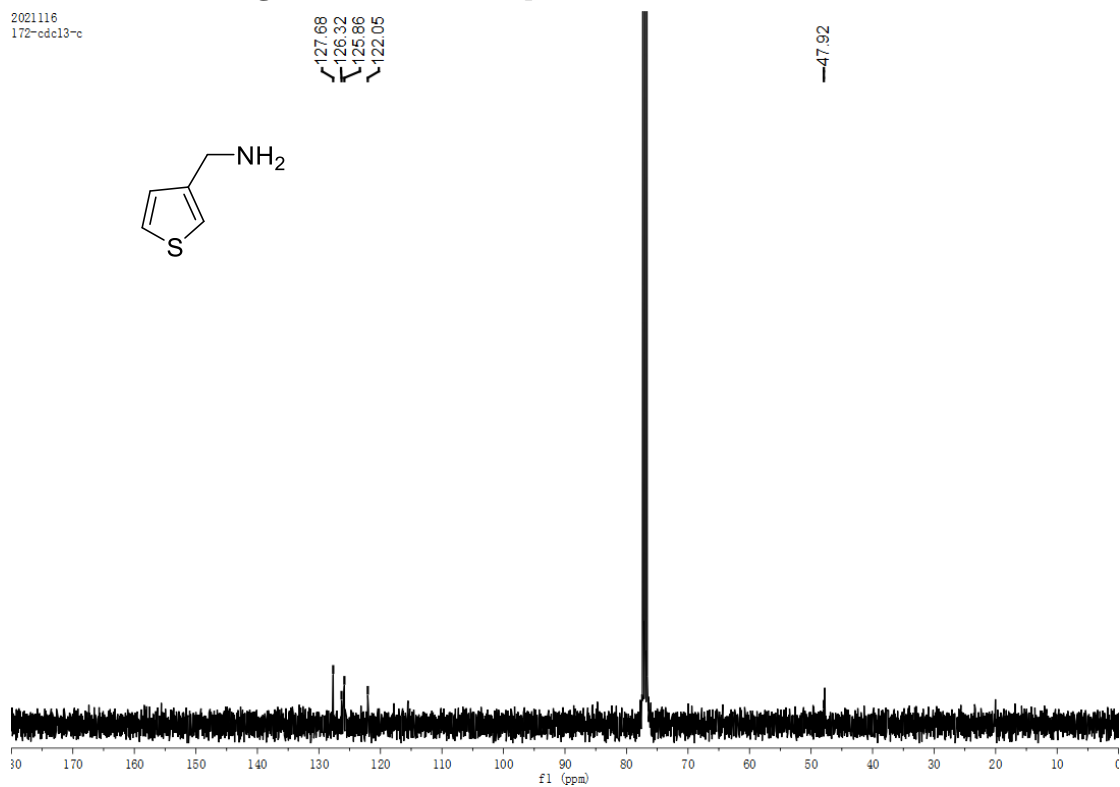

**Figure S139.**  $^{13}\text{C}$  NMR spectrum of **3c** (400 MHz,  $\text{CDCl}_3$ )

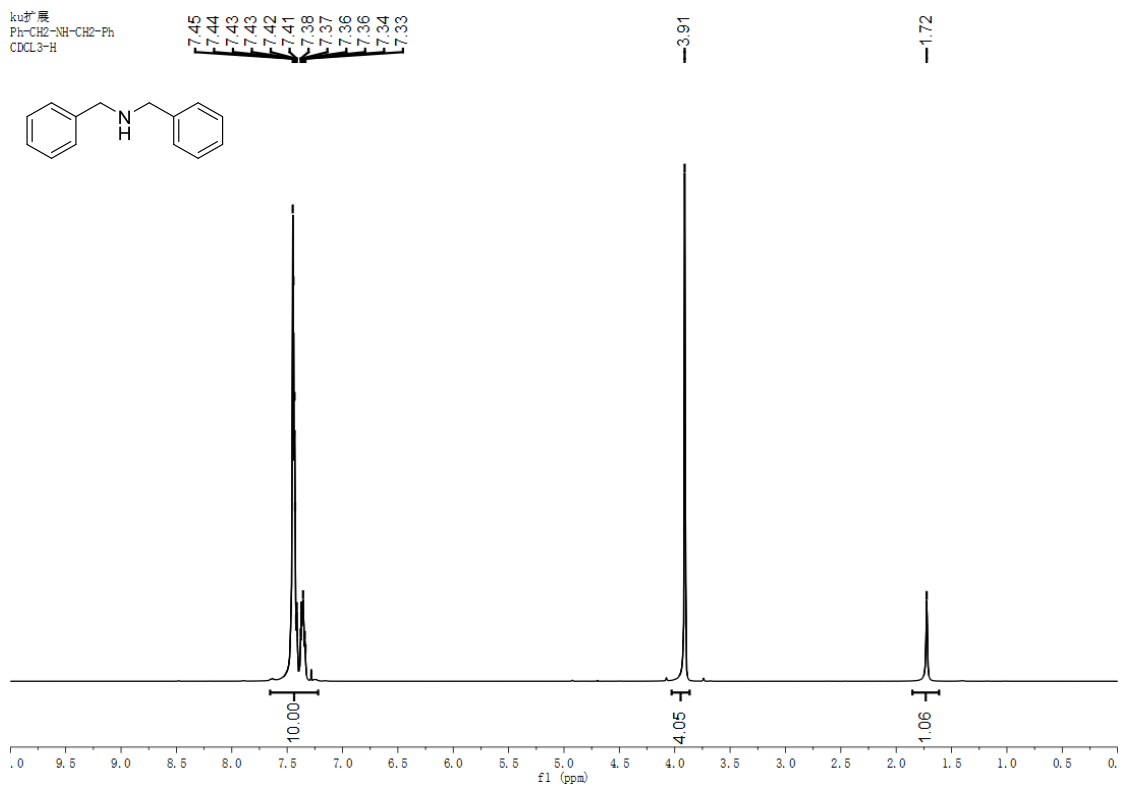

**Figure S140.** <sup>1</sup>H NMR spectrum of **4a** (400 MHz, CDCl<sub>3</sub>)

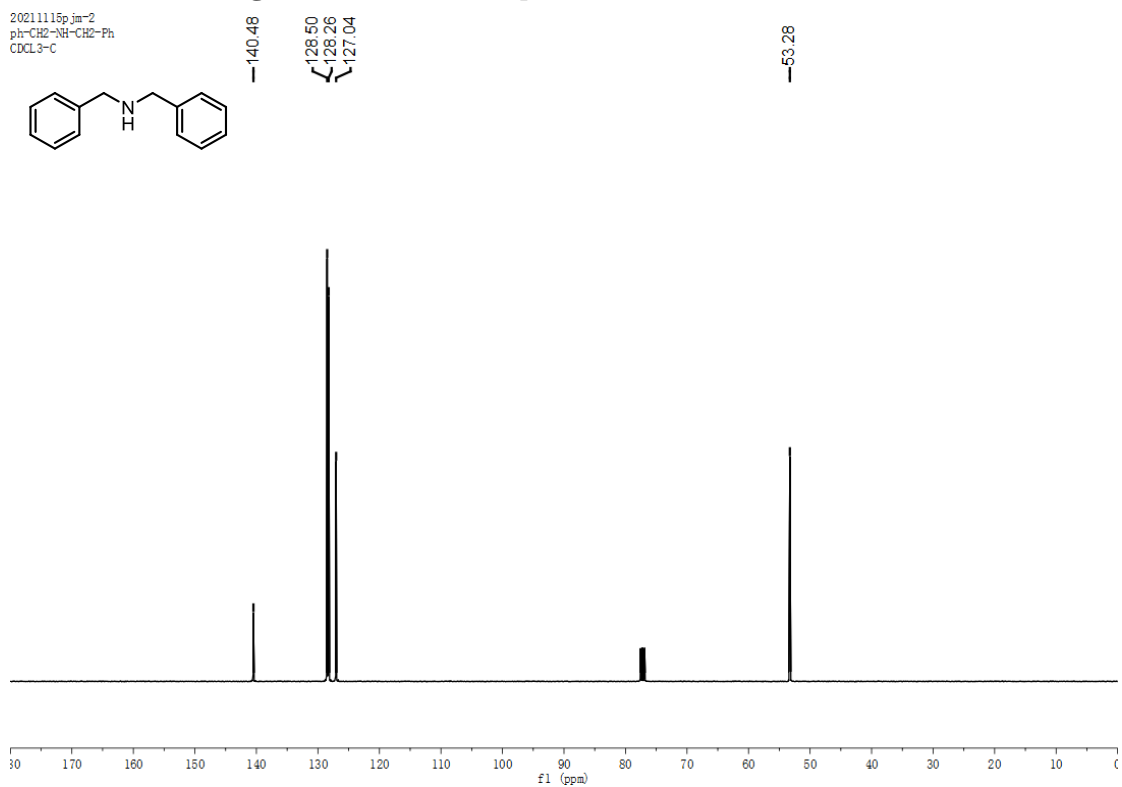

**Figure S141.** <sup>13</sup>C NMR spectrum of **4a** (400 MHz, CDCl<sub>3</sub>)

ku扩展  
273-1-cdc13-h

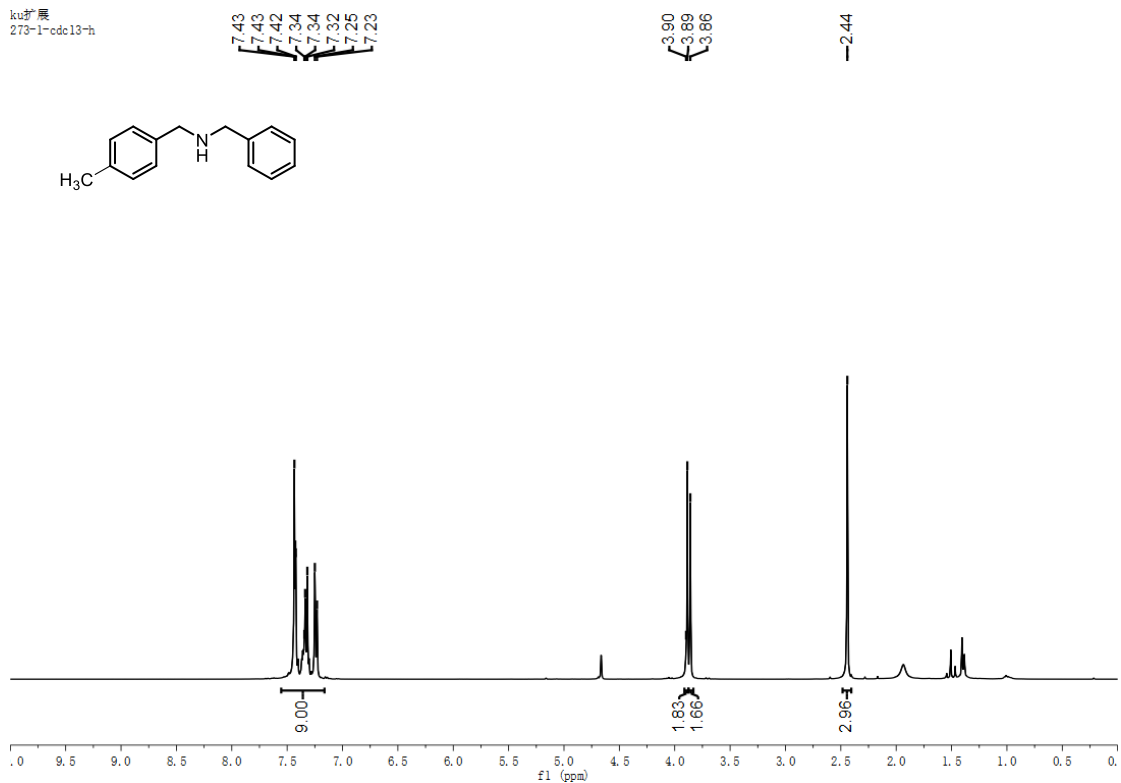

**Figure S142.**  $^1\text{H}$  NMR spectrum of **4b** (400 MHz,  $\text{CDCl}_3$ )

ku扩展  
273-1-cdc13-c

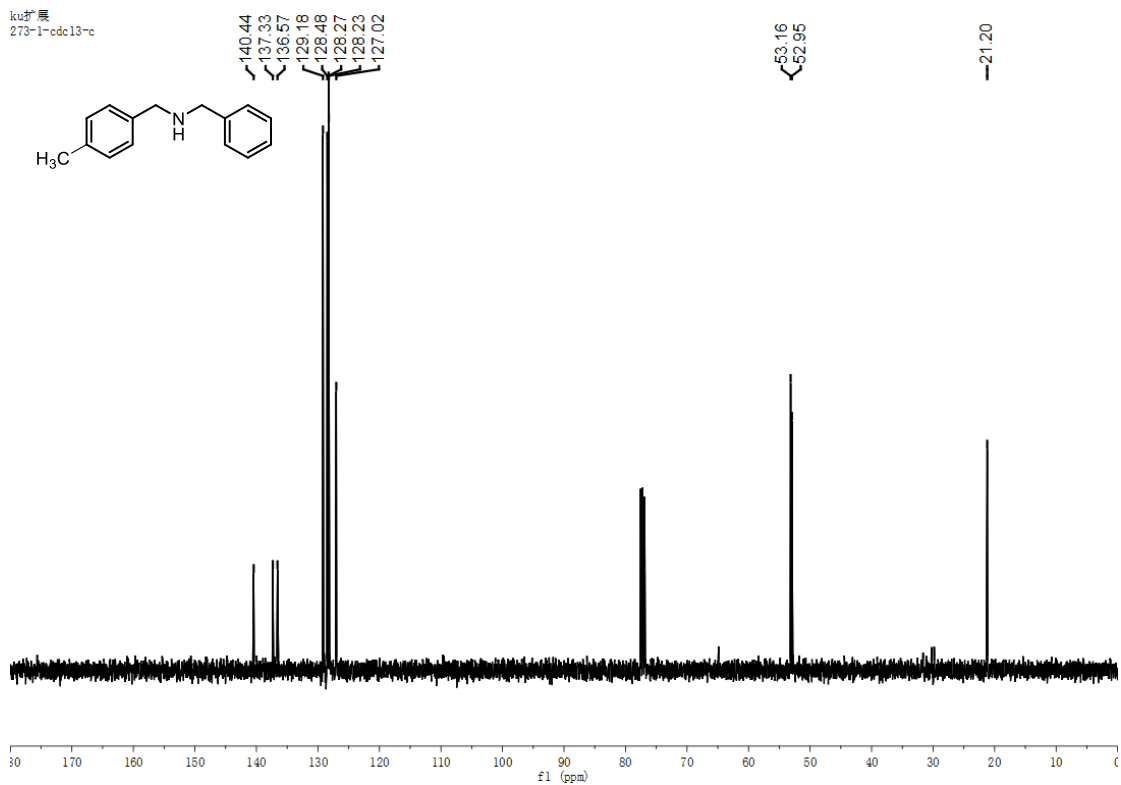

**Figure S143.**  $^{13}\text{C}$  NMR spectrum of **4b** (400 MHz,  $\text{CDCl}_3$ )

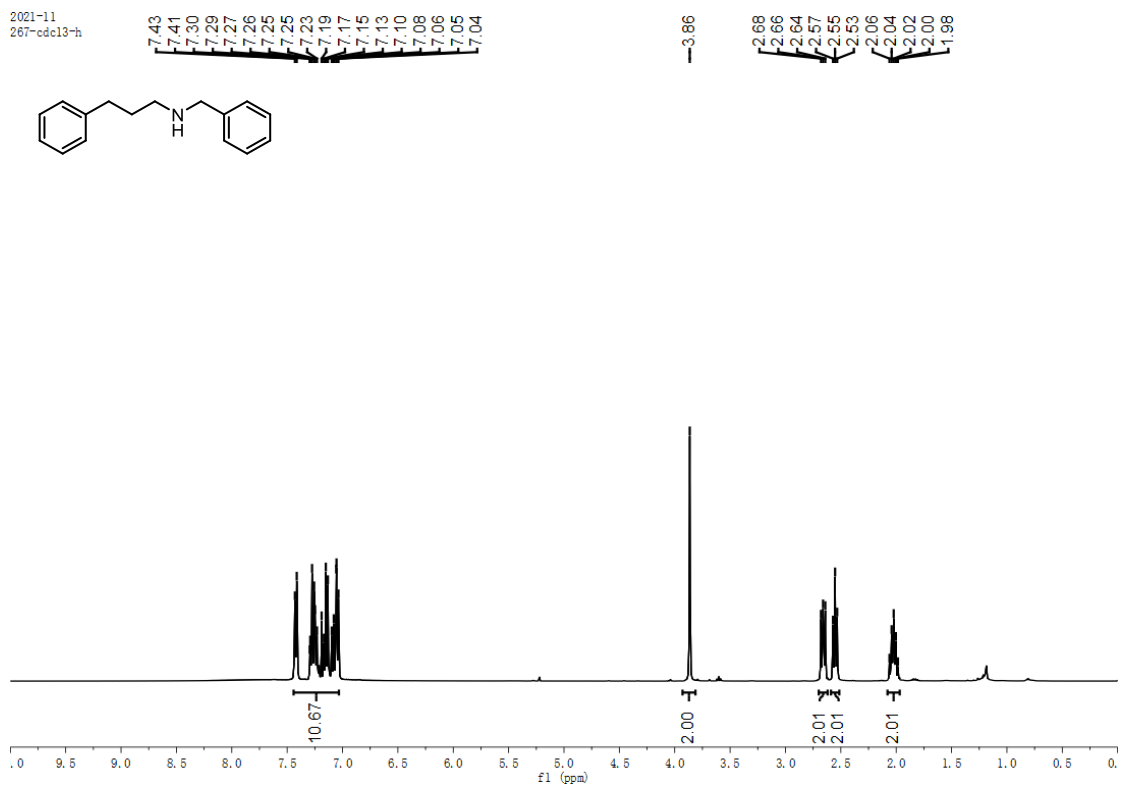

**Figure S144.**  $^1\text{H}$  NMR spectrum of **4c** (400 MHz,  $\text{CDCl}_3$ )

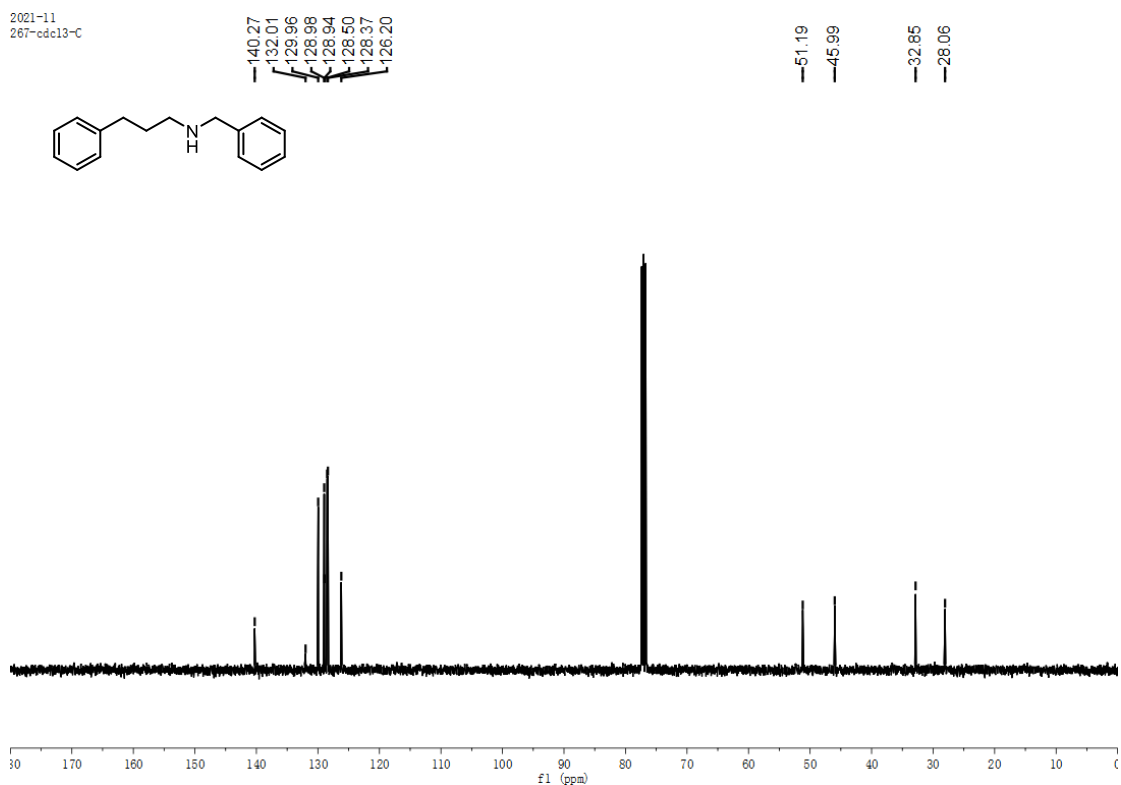

**Figure S145.**  $^{13}\text{C}$  NMR spectrum of **4c** (400 MHz,  $\text{CDCl}_3$ )
